# Supplementary material for: Comparison of high-titer lactic acid fermentation from NaOH- and NH3-H2O2-pretreated corncob by Bacillus coagulans using simultaneous saccharification and fermentation
Source: PubMed Central journal article supplement (PMC5112544; doi:10.1038/srep37245), 2016-11-17
Supplement: srep37245-s1.pdf [file srep37245-s1.pdf]

**Comparison of high-titer lactic acid fermentation from NaOH- and  
NH<sub>3</sub>-H<sub>2</sub>O<sub>2</sub>-pretreated corncob by *Bacillus coagulans* using simultaneous  
saccharification and fermentation**

Zhenting Zhang<sup>a</sup>, Yuejiao Xie<sup>a</sup>, Xiaolan He<sup>a</sup>, Xinli Li<sup>a</sup>, Jinlong Hu<sup>a</sup>, Zhiyong Ruan<sup>b</sup>,  
Shumiao Zhao<sup>a, c</sup>, Nan Peng<sup>a, c, d\*</sup>, Yunxiang Liang<sup>a, c\*</sup>

<sup>a</sup>State Key Laboratory of Agricultural Microbiology, College of Life Science and  
Technology, Huazhong Agricultural University, Wuhan, 430070, Hubei, P.R. China

<sup>b</sup>Key Laboratory of Microbial Resources (Ministry of Agriculture, China), Institute of  
Agricultural Resources and Regional Planning, CAAS, Beijing, 100081, China

<sup>c</sup>Hubei Collaborative Innovation Center for Industrial Fermentation, Wuhan, 430068,  
P. R. China

<sup>d</sup>Key Laboratory of Development and Application of Rural Renewable Energy  
(Ministry of Agriculture), Biomass Energy Technology Research Centre, Biogas  
Institute of Ministry of Agriculture, Chengdu, 610041, Sichuan, P. R. China

\*To whom correspondence should be addressed.

Tel: +86 27 8728 1267; Fax: +86 27 8728 0670; Email: [nanp@mail.hzau.edu.cn](mailto:nanp@mail.hzau.edu.cn) or  
[fa-lyx@163.com](mailto:fa-lyx@163.com)

Figure S1

A: The curves of fermentation on 8% (w/w) NaOH pretreated and washed corncob at pH6.0 adjusted by automatic feeding of NaOH solution

0 h

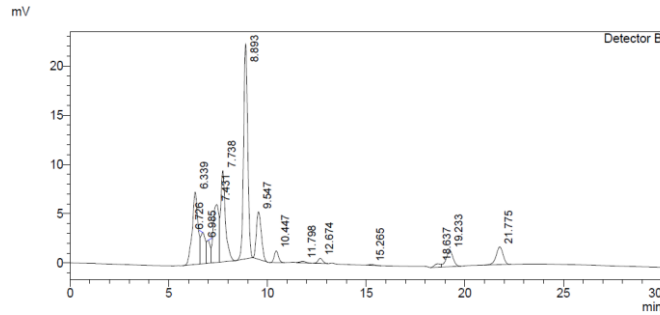

| Peak# | Ret. Time | Area    | Height | Conc.  |
|-------|-----------|---------|--------|--------|
| 1     | 6.339     | 150039  | 7347   | 14.623 |
| 2     | 6.726     | 51667   | 3169   | 5.035  |
| 3     | 6.985     | 28872   | 2325   | 2.814  |
| 4     | 7.431     | 119083  | 5862   | 11.606 |
| 5     | 7.738     | 154500  | 9248   | 15.057 |
| 6     | 8.893     | 318255  | 21772  | 31.016 |
| 7     | 9.547     | 82450   | 4810   | 8.035  |
| 8     | 10.447    | 17569   | 1186   | 1.712  |
| 9     | 11.798    | 3247    | 149    | 0.316  |
| 10    | 12.674    | 8556    | 521    | 0.834  |
| 11    | 15.265    | 1477    | 85     | 0.144  |
| 12    | 18.637    | 7651    | 353    | 0.746  |
| 13    | 19.233    | 39291   | 1637   | 3.829  |
| 14    | 21.775    | 43425   | 1791   | 4.232  |
| Total |           | 1026082 | 60254  |        |

mV

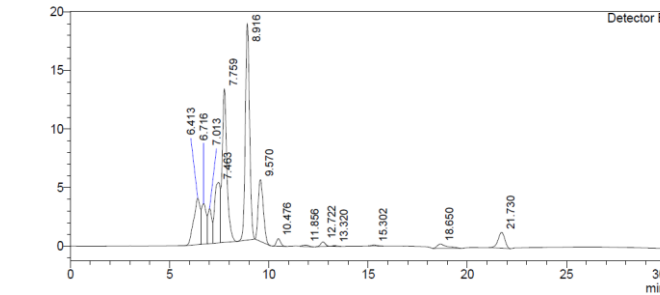

| Peak# | Ret. Time | Area   | Height | Conc.  |
|-------|-----------|--------|--------|--------|
| 1     | 6.413     | 89325  | 3950   | 9.468  |
| 2     | 6.716     | 58096  | 3462   | 6.158  |
| 3     | 7.013     | 41758  | 2985   | 4.426  |
| 4     | 7.463     | 101078 | 5167   | 10.714 |
| 5     | 7.759     | 216929 | 13080  | 22.994 |
| 6     | 8.916     | 277531 | 18447  | 29.418 |
| 7     | 9.570     | 92364  | 5263   | 9.790  |
| 8     | 10.476    | 9673   | 646    | 1.025  |
| 9     | 11.856    | 2985   | 144    | 0.316  |
| 10    | 12.722    | 6560   | 393    | 0.695  |
| 11    | 13.320    | 1049   | 70     | 0.111  |
| 12    | 15.302    | 1884   | 100    | 0.200  |
| 13    | 18.650    | 12865  | 360    | 1.364  |
| 14    | 21.730    | 31317  | 1358   | 3.320  |
| Total |           | 943413 | 55424  |        |

12 h

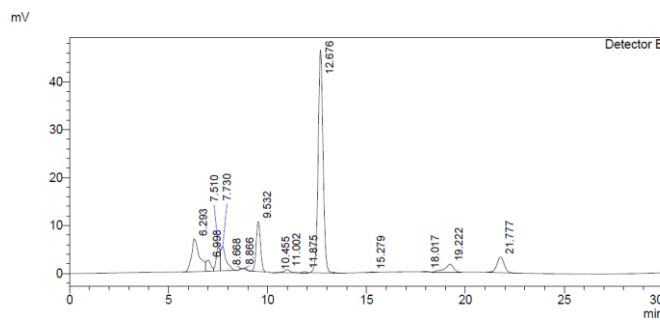

| Peak# | Ret. Time | Area    | Height | Conc.  |
|-------|-----------|---------|--------|--------|
| 1     | 6.293     | 189410  | 6871   | 12.516 |
| 2     | 6.998     | 39508   | 2345   | 2.611  |
| 3     | 7.510     | 66688   | 4960   | 4.407  |
| 4     | 7.730     | 94252   | 5111   | 6.228  |
| 5     | 8.668     | 1437    | 157    | 0.095  |
| 6     | 8.866     | 3283    | 311    | 0.217  |
| 7     | 9.532     | 155290  | 10405  | 10.261 |
| 8     | 10.455    | 604     | 54     | 0.040  |
| 9     | 11.002    | 13141   | 676    | 0.868  |
| 10    | 11.875    | 3432    | 263    | 0.227  |
| 11    | 12.676    | 808264  | 46469  | 53.409 |
| 12    | 15.279    | 1736    | 101    | 0.115  |
| 13    | 18.017    | 1728    | 103    | 0.114  |
| 14    | 19.222    | 51984   | 1681   | 3.435  |
| 15    | 21.777    | 82578   | 3267   | 5.457  |
| Total |           | 1513336 | 82774  |        |

mV

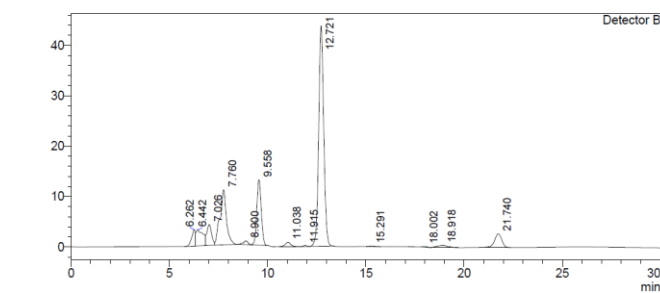

| Peak# | Ret. Time | Area    | Height | Conc.  |
|-------|-----------|---------|--------|--------|
| 1     | 6.262     | 43483   | 3274   | 2.819  |
| 2     | 6.442     | 76296   | 3188   | 4.947  |
| 3     | 7.026     | 71329   | 4148   | 4.625  |
| 4     | 7.760     | 248920  | 10921  | 16.139 |
| 5     | 8.900     | 11982   | 746    | 0.777  |
| 6     | 9.558     | 199992  | 12972  | 12.966 |
| 7     | 11.038    | 18102   | 895    | 1.174  |
| 8     | 11.915    | 2681    | 200    | 0.174  |
| 9     | 12.721    | 781574  | 43706  | 50.673 |
| 10    | 15.291    | 2217    | 122    | 0.144  |
| 11    | 18.002    | 1436    | 90     | 0.093  |
| 12    | 18.918    | 17398   | 438    | 1.128  |
| 13    | 21.740    | 66967   | 2710   | 4.342  |
| Total |           | 1542377 | 83411  |        |

18 h

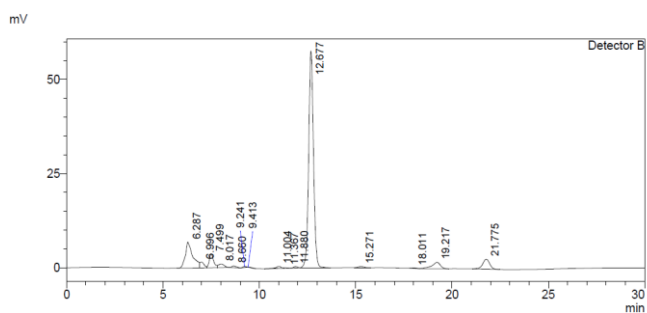

| Detector B |           |         |        |        |
|------------|-----------|---------|--------|--------|
| Peak#      | Ret. Time | Area    | Height | Conc.  |
| 1          | 6.287     | 184506  | 6872   | 12.780 |
| 2          | 6.996     | 22275   | 1521   | 1.543  |
| 3          | 7.499     | 57461   | 3683   | 3.980  |
| 4          | 8.017     | 20738   | 952    | 1.436  |
| 5          | 8.660     | 7765    | 505    | 0.538  |
| 6          | 9.241     | 3381    | 278    | 0.234  |
| 7          | 9.413     | 1028    | 16     | 0.071  |
| 8          | 11.004    | 10908   | 567    | 0.756  |
| 9          | 11.367    | 1719    | 116    | 0.119  |
| 10         | 11.880    | 4871    | 366    | 0.337  |
| 11         | 12.677    | 1001843 | 57512  | 69.395 |
| 12         | 15.271    | 5516    | 292    | 0.382  |
| 13         | 18.011    | 1746    | 110    | 0.121  |
| 14         | 19.217    | 53661   | 1719   | 3.717  |
| 15         | 21.775    | 66258   | 2650   | 4.590  |
| Total      |           | 1443677 | 77158  |        |

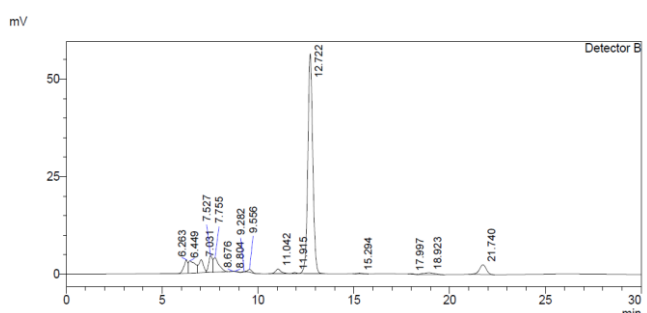

| Detector B |           |         |        |        |
|------------|-----------|---------|--------|--------|
| Peak#      | Ret. Time | Area    | Height | Conc.  |
| 1          | 6.263     | 46801   | 3456   | 3.230  |
| 2          | 6.449     | 76627   | 3165   | 5.289  |
| 3          | 7.031     | 56427   | 3296   | 3.895  |
| 4          | 7.527     | 58073   | 4245   | 4.008  |
| 5          | 7.755     | 73737   | 3707   | 5.089  |
| 6          | 8.676     | 899     | 99     | 0.062  |
| 7          | 8.804     | 965     | 31     | 0.067  |
| 8          | 9.282     | 1546    | 141    | 0.107  |
| 9          | 9.556     | 10322   | 735    | 0.712  |
| 10         | 11.042    | 25831   | 1226   | 1.783  |
| 11         | 11.915    | 3536    | 266    | 0.244  |
| 12         | 12.722    | 1009592 | 56312  | 69.680 |
| 13         | 15.294    | 3957    | 210    | 0.273  |
| 14         | 17.997    | 1266    | 80     | 0.087  |
| 15         | 18.923    | 18058   | 468    | 1.246  |
| 16         | 21.740    | 61253   | 2486   | 4.228  |
| Total      |           | 1448891 | 79923  |        |

24 h

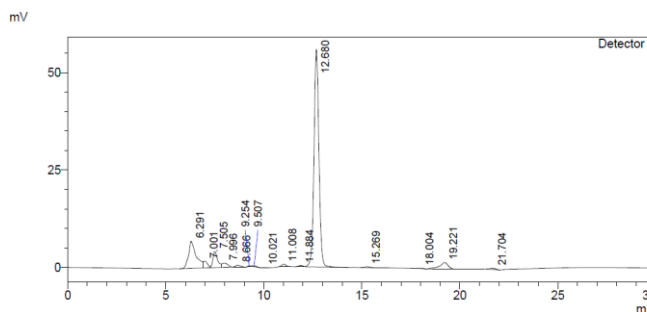

| Detector B |           |         |        |        |
|------------|-----------|---------|--------|--------|
| Peak#      | Ret. Time | Area    | Height | Conc.  |
| 1          | 6.291     | 189098  | 6998   | 13.735 |
| 2          | 7.001     | 25464   | 1721   | 1.849  |
| 3          | 7.505     | 69050   | 4149   | 5.015  |
| 4          | 7.996     | 21210   | 1070   | 1.541  |
| 5          | 8.666     | 7724    | 489    | 0.561  |
| 6          | 9.254     | 1494    | 143    | 0.108  |
| 7          | 9.507     | 3082    | 216    | 0.224  |
| 8          | 10.021    | 358     | 35     | 0.026  |
| 9          | 11.008    | 9037    | 636    | 0.656  |
| 10         | 11.884    | 5935    | 390    | 0.431  |
| 11         | 12.680    | 980688  | 55873  | 71.229 |
| 12         | 15.269    | 4073    | 225    | 0.296  |
| 13         | 18.004    | 1867    | 110    | 0.136  |
| 14         | 19.221    | 51662   | 1666   | 3.752  |
| 15         | 21.704    | 6060    | 296    | 0.440  |
| Total      |           | 1376803 | 74017  |        |

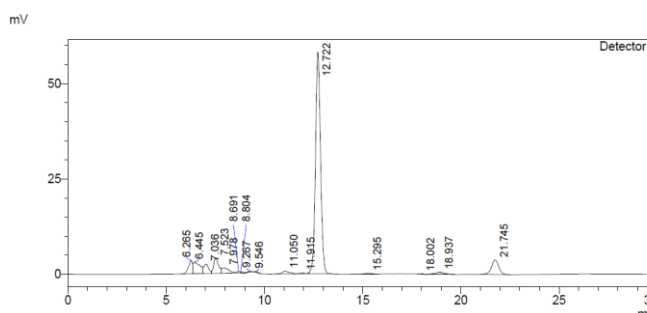

| Detector B |           |         |        |        |
|------------|-----------|---------|--------|--------|
| Peak#      | Ret. Time | Area    | Height | Conc.  |
| 1          | 6.265     | 49043   | 3536   | 3.340  |
| 2          | 6.445     | 74649   | 3054   | 5.084  |
| 3          | 7.036     | 41129   | 2471   | 2.801  |
| 4          | 7.523     | 68562   | 3964   | 4.670  |
| 5          | 7.978     | 33202   | 1377   | 2.261  |
| 6          | 8.691     | 4586    | 332    | 0.312  |
| 7          | 8.804     | 2376    | 262    | 0.162  |
| 8          | 9.267     | 3773    | 333    | 0.257  |
| 9          | 9.546     | 2869    | 214    | 0.195  |
| 10         | 11.050    | 19263   | 805    | 1.312  |
| 11         | 11.915    | 3609    | 273    | 0.246  |
| 12         | 12.722    | 1042036 | 58144  | 70.973 |
| 13         | 15.295    | 4716    | 250    | 0.321  |
| 14         | 18.002    | 1464    | 89     | 0.100  |
| 15         | 18.937    | 20729   | 584    | 1.412  |
| 16         | 21.745    | 96209   | 3788   | 6.553  |
| Total      |           | 1468214 | 79478  |        |

36 h

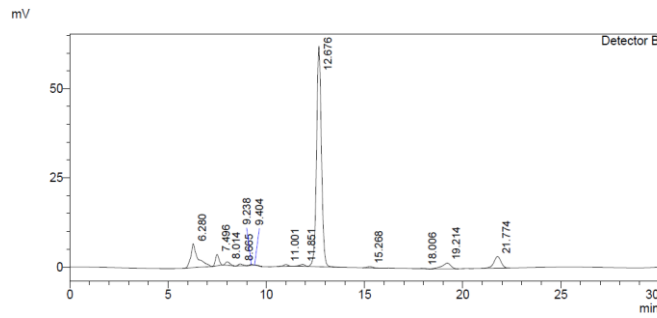

| Peak# | Ret. Time | Area    | Height | Conc.  |
|-------|-----------|---------|--------|--------|
| 1     | 6.280     | 168165  | 6684   | 11.427 |
| 2     | 7.496     | 40937   | 3150   | 2.782  |
| 3     | 8.014     | 15895   | 1004   | 1.080  |
| 4     | 8.665     | 8621    | 535    | 0.586  |
| 5     | 9.238     | 3697    | 315    | 0.251  |
| 6     | 9.404     | 1658    | 37     | 0.113  |
| 7     | 11.001    | 8600    | 512    | 0.584  |
| 8     | 11.851    | 9170    | 512    | 0.623  |
| 9     | 12.676    | 1074099 | 61687  | 72.984 |
| 10    | 15.268    | 6415    | 347    | 0.436  |
| 11    | 18.006    | 1615    | 99     | 0.110  |
| 12    | 19.214    | 51693   | 1631   | 3.512  |
| 13    | 21.774    | 81124   | 3223   | 5.512  |
| Total |           | 1471687 | 79737  |        |

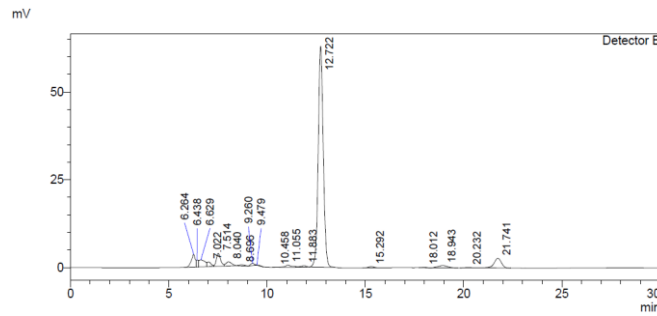

| Peak# | Ret. Time | Area    | Height | Conc.  |
|-------|-----------|---------|--------|--------|
| 1     | 6.264     | 50926   | 3639   | 3.458  |
| 2     | 6.438     | 15334   | 1970   | 1.041  |
| 3     | 6.629     | 40688   | 1971   | 2.763  |
| 4     | 7.022     | 18939   | 1339   | 1.286  |
| 5     | 7.514     | 55131   | 3675   | 3.744  |
| 6     | 8.040     | 24068   | 1196   | 1.634  |
| 7     | 8.696     | 5355    | 301    | 0.364  |
| 8     | 9.260     | 8275    | 628    | 0.562  |
| 9     | 9.479     | 1613    | 37     | 0.110  |
| 10    | 10.458    | 351     | 27     | 0.024  |
| 11    | 11.055    | 15132   | 623    | 1.028  |
| 12    | 11.883    | 8046    | 434    | 0.546  |
| 13    | 12.722    | 1127446 | 62920  | 76.564 |
| 14    | 15.292    | 5873    | 310    | 0.399  |
| 15    | 18.012    | 1961    | 115    | 0.133  |
| 16    | 18.943    | 23712   | 715    | 1.610  |
| 17    | 20.232    | 1810    | 73     | 0.123  |
| 18    | 21.741    | 67902   | 2727   | 4.611  |
| Total |           | 1472561 | 82701  |        |

42 h

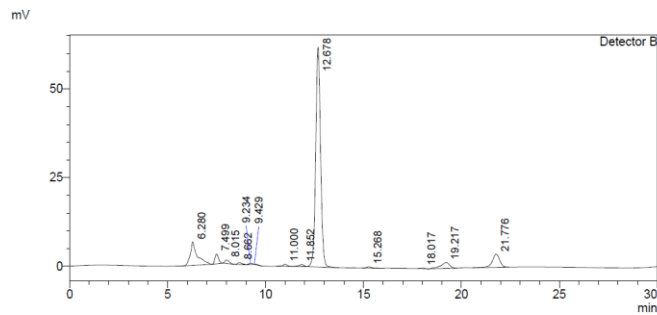

| Peak# | Ret. Time | Area    | Height | Conc.  |
|-------|-----------|---------|--------|--------|
| 1     | 6.280     | 166044  | 6621   | 11.172 |
| 2     | 7.499     | 35691   | 2740   | 2.401  |
| 3     | 8.015     | 15771   | 1009   | 1.061  |
| 4     | 8.662     | 8084    | 536    | 0.544  |
| 5     | 9.234     | 4259    | 341    | 0.287  |
| 6     | 9.429     | 1741    | 72     | 0.117  |
| 7     | 11.000    | 8818    | 525    | 0.593  |
| 8     | 11.852    | 9495    | 524    | 0.639  |
| 9     | 12.676    | 1080678 | 61961  | 72.709 |
| 10    | 15.268    | 6941    | 373    | 0.467  |
| 11    | 18.017    | 1676    | 102    | 0.113  |
| 12    | 19.217    | 53160   | 1684   | 3.577  |
| 13    | 21.776    | 93954   | 3653   | 6.321  |
| Total |           | 1486312 | 80141  |        |

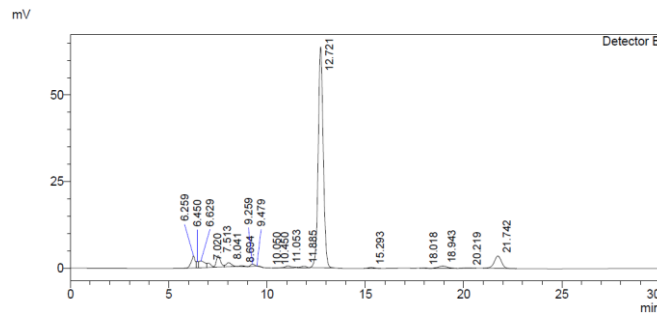

| Peak# | Ret. Time | Area    | Height | Conc.  |
|-------|-----------|---------|--------|--------|
| 1     | 6.259     | 47383   | 3455   | 3.171  |
| 2     | 6.450     | 13311   | 1809   | 0.891  |
| 3     | 6.629     | 40897   | 1921   | 2.737  |
| 4     | 7.022     | 17305   | 1230   | 1.158  |
| 5     | 7.513     | 49670   | 3325   | 3.324  |
| 6     | 8.041     | 23103   | 1184   | 1.546  |
| 7     | 8.694     | 4364    | 277    | 0.292  |
| 8     | 9.259     | 8441    | 647    | 0.565  |
| 9     | 9.479     | 1235    | 44     | 0.083  |
| 10    | 10.450    | 27      | 6      | 0.002  |
| 11    | 10.450    | 356     | 27     | 0.024  |
| 12    | 11.053    | 14319   | 626    | 0.958  |
| 13    | 11.885    | 8128    | 444    | 0.544  |
| 14    | 12.721    | 1140257 | 63701  | 76.306 |
| 15    | 15.293    | 6074    | 319    | 0.406  |
| 16    | 18.018    | 1896    | 113    | 0.127  |
| 17    | 18.943    | 24418   | 744    | 1.634  |
| 18    | 20.219    | 2542    | 99     | 0.170  |
| 19    | 21.742    | 90605   | 3555   | 6.063  |
| Total |           | 1494330 | 83526  |        |

48 h

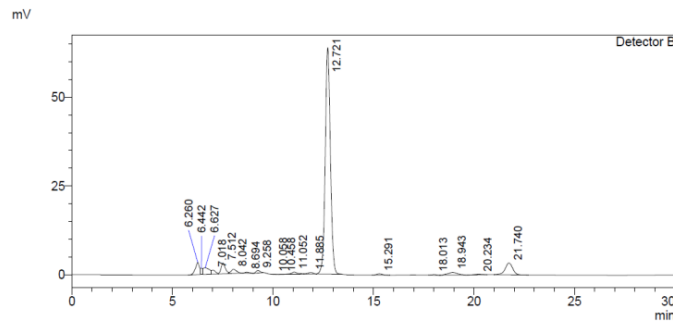

| Peak# | Ret. Time | Area    | Height | Conc.  |
|-------|-----------|---------|--------|--------|
| 1     | 6.260     | 48445   | 3497   | 3.269  |
| 2     | 6.442     | 13144   | 1791   | 0.887  |
| 3     | 6.627     | 38852   | 1859   | 2.622  |
| 4     | 7.018     | 14994   | 1115   | 1.012  |
| 5     | 7.512     | 44874   | 3029   | 3.028  |
| 6     | 8.042     | 22011   | 1162   | 1.485  |
| 7     | 8.694     | 4323    | 283    | 0.292  |
| 8     | 9.258     | 9981    | 703    | 0.673  |
| 9     | 10.058    | 72      | 10     | 0.005  |
| 10    | 10.458    | 331     | 25     | 0.022  |
| 11    | 11.052    | 13664   | 633    | 0.922  |
| 12    | 11.885    | 8278    | 450    | 0.559  |
| 13    | 12.721    | 1142869 | 63804  | 77.118 |
| 14    | 15.291    | 6166    | 325    | 0.416  |
| 15    | 18.013    | 2017    | 117    | 0.136  |
| 16    | 18.943    | 25090   | 770    | 1.693  |
| 17    | 20.234    | 3130    | 118    | 0.211  |
| 18    | 21.740    | 83726   | 3297   | 5.650  |
| Total |           | 1481966 | 82988  |        |

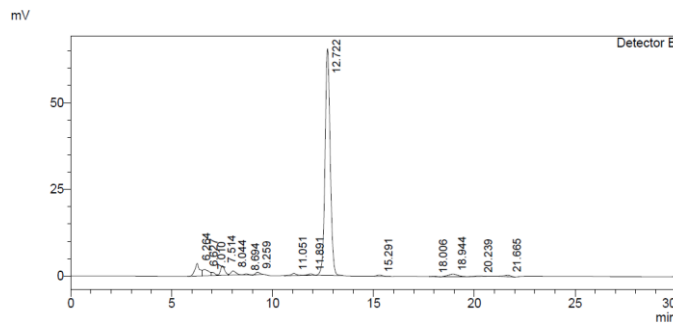

| Peak# | Ret. Time | Area    | Height | Conc.  |
|-------|-----------|---------|--------|--------|
| 1     | 6.264     | 62374   | 3626   | 4.368  |
| 2     | 6.627     | 37844   | 1814   | 2.651  |
| 3     | 7.010     | 12386   | 968    | 0.868  |
| 4     | 7.514     | 39873   | 2712   | 2.793  |
| 5     | 8.044     | 21089   | 1167   | 1.477  |
| 6     | 8.694     | 4600    | 303    | 0.322  |
| 7     | 9.259     | 10221   | 709    | 0.716  |
| 8     | 11.051    | 12484   | 646    | 0.874  |
| 9     | 11.891    | 8373    | 465    | 0.586  |
| 10    | 12.722    | 1172139 | 65423  | 82.094 |
| 11    | 15.291    | 6473    | 338    | 0.453  |
| 12    | 18.006    | 1680    | 101    | 0.118  |
| 13    | 18.944    | 25834   | 812    | 1.809  |
| 14    | 20.239    | 3572    | 137    | 0.250  |
| 15    | 21.665    | 8864    | 385    | 0.621  |
| Total |           | 1427806 | 79608  |        |

B: The curves of fermentation on 8% (w/w) NaOH pretreated and washed corncob at pH6.0 adjusted by CaCO<sub>3</sub>

0 h

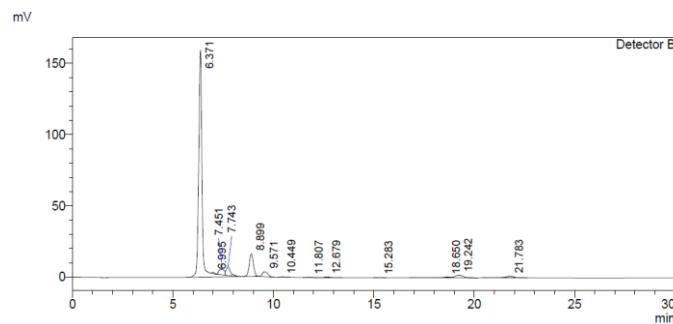

| Peak# | Ret. Time | Area    | Height | Conc.  |
|-------|-----------|---------|--------|--------|
| 1     | 6.371     | 1883745 | 159170 | 76.653 |
| 2     | 6.995     | 7172    | 840    | 0.292  |
| 3     | 7.451     | 69187   | 3897   | 2.815  |
| 4     | 7.743     | 91196   | 5991   | 3.711  |
| 5     | 8.899     | 233658  | 16035  | 9.508  |
| 6     | 9.571     | 64544   | 3462   | 2.626  |
| 7     | 10.449    | 4882    | 345    | 0.199  |
| 8     | 11.807    | 2555    | 127    | 0.104  |
| 9     | 12.679    | 7351    | 451    | 0.299  |
| 10    | 15.283    | 1716    | 99     | 0.070  |
| 11    | 18.650    | 9456    | 434    | 0.385  |
| 12    | 19.242    | 58770   | 1994   | 2.391  |
| 13    | 21.783    | 23274   | 1001   | 0.947  |
| Total |           | 2457507 | 193845 |        |

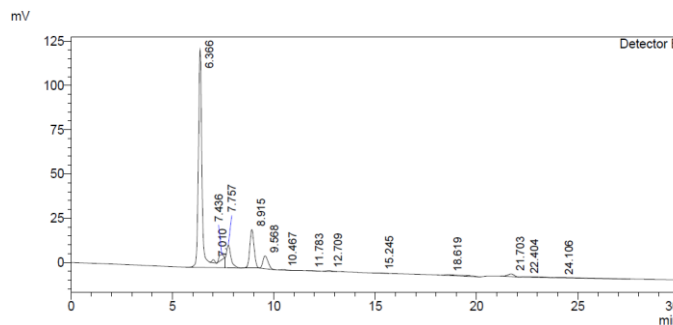

| Peak# | Ret. Time | Area    | Height | Conc.  |
|-------|-----------|---------|--------|--------|
| 1     | 6.366     | 1623076 | 122892 | 65.525 |
| 2     | 7.010     | 16045   | 1747   | 0.648  |
| 3     | 7.436     | 46453   | 2794   | 1.875  |
| 4     | 7.757     | 213424  | 12951  | 8.616  |
| 5     | 8.915     | 325065  | 21724  | 13.123 |
| 6     | 9.568     | 125165  | 7189   | 5.053  |
| 7     | 10.467    | 4690    | 329    | 0.189  |
| 8     | 11.783    | 2366    | 113    | 0.096  |
| 9     | 12.709    | 8077    | 488    | 0.326  |
| 10    | 15.245    | 1344    | 79     | 0.054  |
| 11    | 18.619    | 37881   | 494    | 1.529  |
| 12    | 21.703    | 32148   | 1495   | 1.298  |
| 13    | 22.404    | 20149   | 277    | 0.813  |
| 14    | 24.106    | 21152   | 206    | 0.854  |
| Total |           | 2477035 | 172779 |        |

12 h

mV

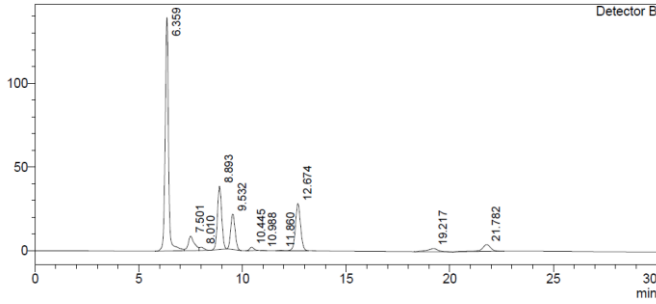

Detector B

| Peak# | Ret. Time | Area    | Height | Conc.  |
|-------|-----------|---------|--------|--------|
| 1     | 6.359     | 1573475 | 139497 | 47.111 |
| 2     | 7.501     | 178832  | 8592   | 5.354  |
| 3     | 8.010     | 28020   | 1845   | 0.839  |
| 4     | 8.893     | 545421  | 37743  | 16.330 |
| 5     | 9.532     | 305960  | 21092  | 9.161  |
| 6     | 10.445    | 28022   | 1945   | 0.839  |
| 7     | 10.988    | 828     | 82     | 0.025  |
| 8     | 11.860    | 2517    | 180    | 0.075  |
| 9     | 12.674    | 484631  | 28140  | 14.510 |
| 10    | 19.217    | 71177   | 1982   | 2.131  |
| 11    | 21.782    | 121072  | 4065   | 3.625  |
| Total |           | 3339955 | 245165 |        |

mV

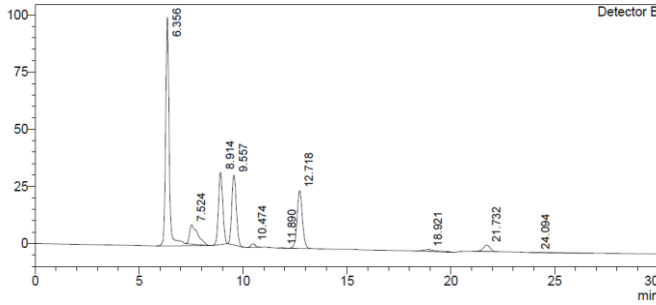

Detector B

| Peak# | Ret. Time | Area    | Height | Conc.  |
|-------|-----------|---------|--------|--------|
| 1     | 6.356     | 1241729 | 99756  | 41.555 |
| 2     | 7.524     | 232468  | 8426   | 7.780  |
| 3     | 8.914     | 464790  | 31533  | 15.554 |
| 4     | 9.557     | 458671  | 30634  | 15.349 |
| 5     | 10.474    | 23567   | 1617   | 0.789  |
| 6     | 11.890    | 2085    | 152    | 0.070  |
| 7     | 12.718    | 447533  | 25198  | 14.977 |
| 8     | 18.921    | 42814   | 808    | 1.433  |
| 9     | 21.732    | 66246   | 2800   | 2.217  |
| 10    | 24.094    | 8286    | 103    | 0.277  |
| Total |           | 2988189 | 201028 |        |

18 h

mV

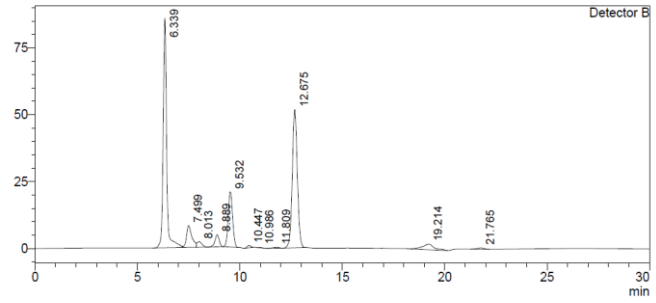

Detector B

| Peak# | Ret. Time | Area    | Height | Conc.  |
|-------|-----------|---------|--------|--------|
| 1     | 6.339     | 1013819 | 85616  | 39.407 |
| 2     | 7.499     | 151071  | 8186   | 5.872  |
| 3     | 8.013     | 34156   | 2095   | 1.328  |
| 4     | 8.889     | 65802   | 4495   | 2.558  |
| 5     | 9.532     | 303191  | 20666  | 11.765 |
| 6     | 10.447    | 10444   | 848    | 0.406  |
| 7     | 10.986    | 1432    | 140    | 0.056  |
| 8     | 11.809    | 7339    | 330    | 0.285  |
| 9     | 12.675    | 891070  | 51702  | 34.636 |
| 10    | 19.214    | 83288   | 2134   | 3.237  |
| 11    | 21.765    | 11044   | 518    | 0.429  |
| Total |           | 2572656 | 176732 |        |

mV

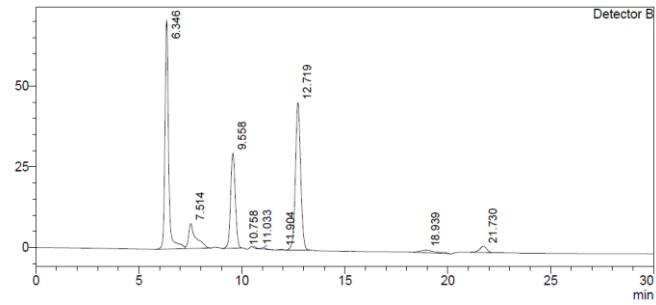

Detector B

| Peak# | Ret. Time | Area    | Height | Conc.  |
|-------|-----------|---------|--------|--------|
| 1     | 6.346     | 873850  | 70822  | 35.991 |
| 2     | 7.514     | 191163  | 7685   | 7.873  |
| 3     | 9.558     | 452944  | 29374  | 18.655 |
| 4     | 10.758    | 385     | 39     | 0.016  |
| 5     | 11.033    | 6070    | 410    | 0.250  |
| 6     | 11.904    | 2144    | 166    | 0.088  |
| 7     | 12.719    | 812904  | 45586  | 33.481 |
| 8     | 18.939    | 43541   | 849    | 1.793  |
| 9     | 21.730    | 44986   | 1932   | 1.853  |
| Total |           | 2427986 | 156862 |        |

24 h

mV

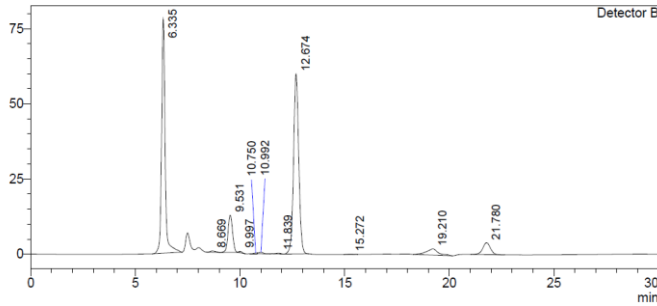

Detector B

| Peak# | Ret. Time | Area    | Height | Conc.  |
|-------|-----------|---------|--------|--------|
| 1     | 6.335     | 915887  | 77900  | 39.024 |
| 2     | 8.669     | 7958    | 431    | 0.339  |
| 3     | 9.531     | 182814  | 12356  | 7.789  |
| 4     | 9.997     | 5074    | 472    | 0.216  |
| 5     | 10.750    | 2677    | 248    | 0.114  |
| 6     | 10.992    | 7912    | 521    | 0.337  |
| 7     | 11.839    | 4406    | 257    | 0.188  |
| 8     | 12.674    | 1034028 | 59848  | 44.058 |
| 9     | 15.272    | 1760    | 99     | 0.075  |
| 10    | 19.210    | 82173   | 2096   | 3.501  |
| 11    | 21.780    | 102275  | 3972   | 4.358  |
| Total |           | 2346964 | 158198 |        |

mV

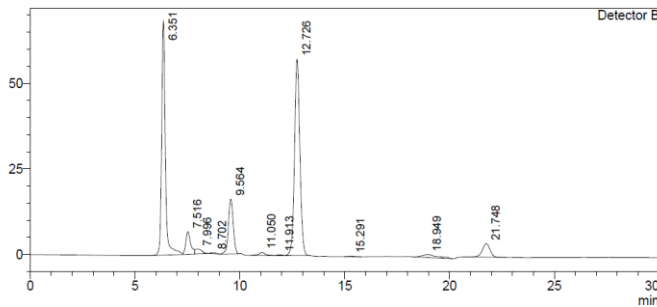

Detector B

| Peak# | Ret. Time | Area    | Height | Conc.  |
|-------|-----------|---------|--------|--------|
| 1     | 6.351     | 843680  | 68296  | 34.694 |
| 2     | 7.516     | 106747  | 6630   | 4.390  |
| 3     | 7.996     | 30870   | 1392   | 1.269  |
| 4     | 8.702     | 5922    | 354    | 0.244  |
| 5     | 9.564     | 249822  | 16019  | 10.273 |
| 6     | 11.050    | 19002   | 922    | 0.781  |
| 7     | 11.813    | 3423    | 255    | 0.141  |
| 8     | 12.726    | 1023489 | 57392  | 42.088 |
| 9     | 15.291    | 2577    | 140    | 0.106  |
| 10    | 18.949    | 45762   | 925    | 1.882  |
| 11    | 21.748    | 100504  | 3976   | 4.133  |
| Total |           | 2431798 | 156302 |        |

36 h

mV

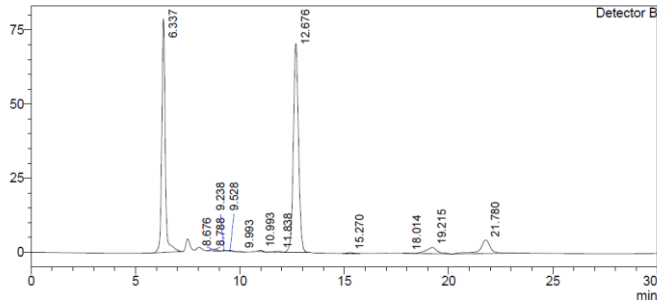

Detector B

| Peak# | Ret. Time | Area    | Height | Conc.  |
|-------|-----------|---------|--------|--------|
| 1     | 6.337     | 917273  | 78655  | 38.100 |
| 2     | 8.676     | 6515    | 523    | 0.271  |
| 3     | 8.788     | 4323    | 442    | 0.180  |
| 4     | 9.238     | 1722    | 158    | 0.072  |
| 5     | 9.528     | 3294    | 233    | 0.137  |
| 6     | 9.993     | 2673    | 222    | 0.111  |
| 7     | 10.993    | 5413    | 446    | 0.225  |
| 8     | 11.838    | 6658    | 334    | 0.277  |
| 9     | 12.676    | 1218913 | 70295  | 50.629 |
| 10    | 15.270    | 4959    | 269    | 0.206  |
| 11    | 18.014    | 1236    | 75     | 0.051  |
| 12    | 19.215    | 80739   | 2128   | 3.354  |
| 13    | 21.780    | 153805  | 4554   | 6.389  |
| Total |           | 2407522 | 158334 |        |

mV

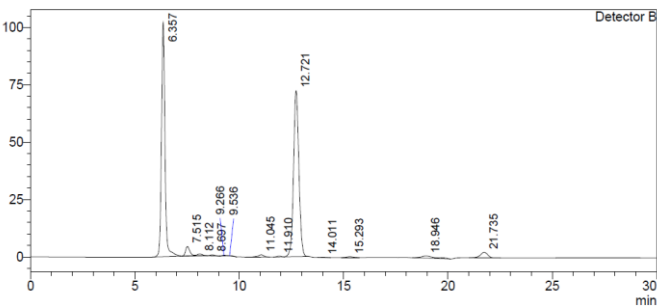

Detector B

| Peak# | Ret. Time | Area    | Height | Conc.  |
|-------|-----------|---------|--------|--------|
| 1     | 6.357     | 1205007 | 101927 | 44.253 |
| 2     | 7.515     | 58655   | 4121   | 2.154  |
| 3     | 8.112     | 13839   | 726    | 0.508  |
| 4     | 8.697     | 8001    | 470    | 0.294  |
| 5     | 9.266     | 3651    | 316    | 0.134  |
| 6     | 9.536     | 2402    | 137    | 0.088  |
| 7     | 11.045    | 19319   | 1036   | 0.709  |
| 8     | 11.910    | 4848    | 357    | 0.178  |
| 9     | 12.721    | 1294689 | 72378  | 47.546 |
| 10    | 14.011    | 1882    | 126    | 0.069  |
| 11    | 15.293    | 6792    | 352    | 0.249  |
| 12    | 18.946    | 45561   | 981    | 1.673  |
| 13    | 21.735    | 58361   | 2411   | 2.143  |
| Total |           | 2723007 | 185337 |        |

42 h

mV

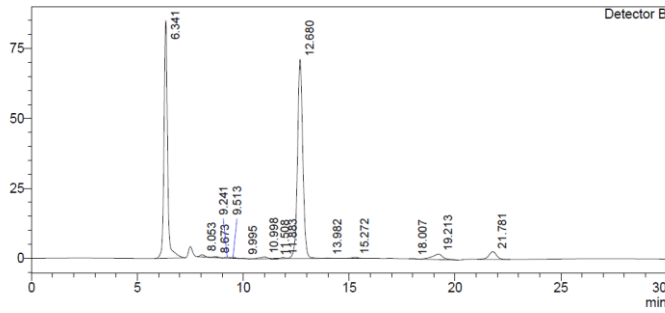

| Peak# | Ret. Time | Area    | Height | Conc.  |
|-------|-----------|---------|--------|--------|
| 1     | 6.338     | 980624  | 84725  | 41.203 |
| 2     | 8.041     | 16094   | 1020   | 0.676  |
| 3     | 8.668     | 8207    | 458    | 0.345  |
| 4     | 9.245     | 2042    | 190    | 0.086  |
| 5     | 9.531     | 2895    | 193    | 0.122  |
| 6     | 9.987     | 1399    | 129    | 0.059  |
| 7     | 10.758    | 3476    | 319    | 0.146  |
| 8     | 10.998    | 10491   | 656    | 0.441  |
| 9     | 11.873    | 4094    | 280    | 0.172  |
| 10    | 12.678    | 1253306 | 71894  | 52.660 |
| 11    | 13.986    | 3215    | 211    | 0.135  |
| 12    | 15.272    | 13323   | 687    | 0.560  |
| 13    | 18.052    | 7724    | 399    | 0.325  |
| 14    | 19.220    | 63511   | 1896   | 2.669  |
| 15    | 21.743    | 9572    | 456    | 0.402  |
| Total |           | 2379974 | 163514 |        |

mV

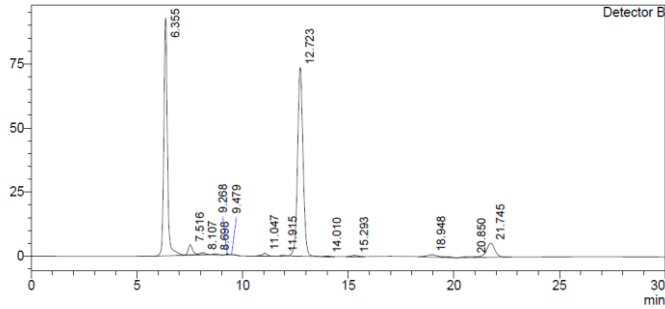

| Peak# | Ret. Time | Area    | Height | Conc.  |
|-------|-----------|---------|--------|--------|
| 1     | 6.355     | 1103316 | 92547  | 40.038 |
| 2     | 7.516     | 56047   | 3927   | 2.034  |
| 3     | 8.107     | 14099   | 747    | 0.512  |
| 4     | 8.698     | 7651    | 466    | 0.278  |
| 5     | 9.268     | 4281    | 342    | 0.155  |
| 6     | 9.479     | 1743    | 26     | 0.063  |
| 7     | 11.047    | 18704   | 1037   | 0.679  |
| 8     | 11.915    | 4798    | 358    | 0.174  |
| 9     | 12.723    | 1324038 | 73618  | 48.048 |
| 10    | 14.010    | 2332    | 151    | 0.085  |
| 11    | 15.293    | 7922    | 407    | 0.287  |
| 12    | 18.948    | 40983   | 924    | 1.487  |
| 13    | 20.850    | 13976   | 352    | 0.507  |
| 14    | 21.745    | 155762  | 5517   | 5.652  |
| Total |           | 2755653 | 180419 |        |

48 h

mV

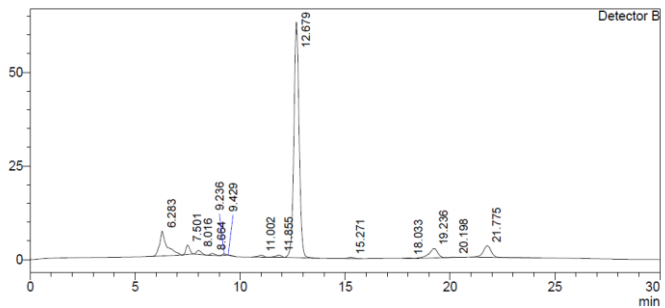

| Peak# | Ret. Time | Area    | Height | Conc.  |
|-------|-----------|---------|--------|--------|
| 1     | 6.339     | 1002781 | 85890  | 40.857 |
| 2     | 7.499     | 54154   | 3830   | 2.206  |
| 3     | 8.044     | 18418   | 1075   | 0.750  |
| 4     | 8.671     | 7107    | 428    | 0.290  |
| 5     | 9.238     | 2136    | 191    | 0.087  |
| 6     | 9.502     | 2077    | 111    | 0.085  |
| 7     | 9.988     | 2108    | 155    | 0.086  |
| 8     | 10.758    | 3918    | 324    | 0.160  |
| 9     | 10.994    | 10409   | 666    | 0.424  |
| 10    | 11.870    | 3823    | 279    | 0.156  |
| 11    | 12.676    | 1251482 | 71920  | 50.990 |
| 12    | 13.969    | 1129    | 81     | 0.046  |
| 13    | 15.269    | 7975    | 428    | 0.325  |
| 14    | 18.034    | 2208    | 126    | 0.090  |
| 15    | 19.212    | 72314   | 2007   | 2.946  |
| 16    | 21.745    | 12312   | 517    | 0.502  |
| Total |           | 2454351 | 168027 |        |

mV

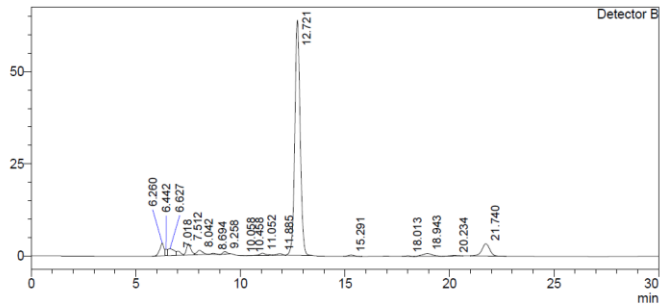

| Peak# | Ret. Time | Area    | Height | Conc.  |
|-------|-----------|---------|--------|--------|
| 1     | 6.354     | 1045715 | 87912  | 41.271 |
| 2     | 7.516     | 46725   | 3307   | 1.844  |
| 3     | 8.092     | 14550   | 812    | 0.574  |
| 4     | 8.698     | 6794    | 427    | 0.268  |
| 5     | 9.272     | 3832    | 304    | 0.151  |
| 6     | 9.454     | 2115    | 46     | 0.083  |
| 7     | 11.049    | 18984   | 1056   | 0.749  |
| 8     | 11.917    | 5114    | 377    | 0.202  |
| 9     | 12.724    | 1329378 | 74553  | 52.466 |
| 10    | 14.013    | 2776    | 180    | 0.110  |
| 11    | 15.294    | 10088   | 515    | 0.398  |
| 12    | 18.010    | 2388    | 135    | 0.094  |
| 13    | 18.948    | 37382   | 894    | 1.475  |
| 14    | 21.658    | 7941    | 374    | 0.313  |
| Total |           | 2533782 | 170892 |        |



C: The curves of fed-batch fermentation from 8% to 16% (w/w) NaOH pretreated and washed corncob at pH6.0 adjusted by CaCO<sub>3</sub>

0 h

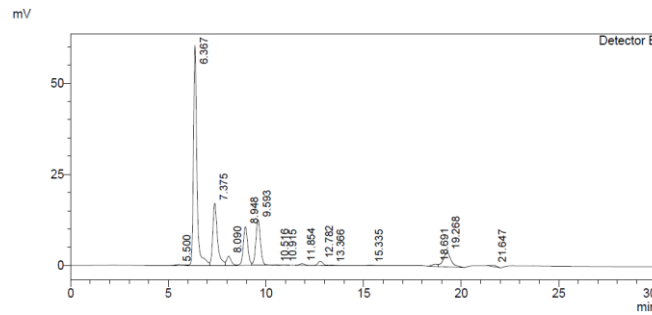

| Detector B   |           |                |              |        |
|--------------|-----------|----------------|--------------|--------|
| Peak#        | Ret. Time | Area           | Height       | Conc.  |
| 1            | 6.315     | 502605         | 32533        | 32.379 |
| 2            | 7.003     | 11697          | 1206         | 0.754  |
| 3            | 7.743     | 275103         | 12544        | 17.723 |
| 4            | 8.899     | 438432         | 28687        | 28.245 |
| 5            | 9.546     | 122975         | 7388         | 7.922  |
| 6            | 10.447    | 5015           | 352          | 0.323  |
| 7            | 11.728    | 3891           | 190          | 0.251  |
| 8            | 12.699    | 12288          | 679          | 0.792  |
| 9            | 18.639    | 38749          | 552          | 2.496  |
| 10           | 20.606    | 34827          | 547          | 2.244  |
| 11           | 21.625    | 17933          | 774          | 1.155  |
| 12           | 22.327    | 88736          | 682          | 5.717  |
| <b>Total</b> |           | <b>1552251</b> | <b>86134</b> |        |

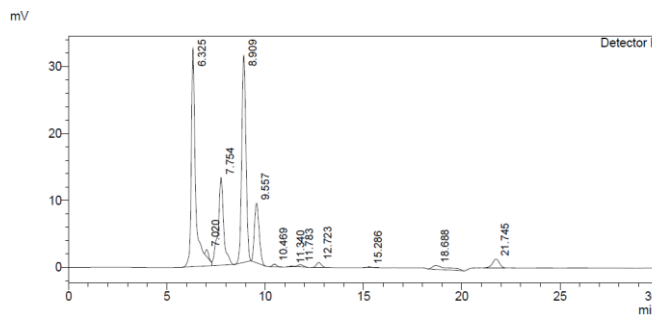

| Detector B   |           |                |              |        |
|--------------|-----------|----------------|--------------|--------|
| Peak#        | Ret. Time | Area           | Height       | Conc.  |
| 1            | 6.325     | 505347         | 32569        | 33.999 |
| 2            | 7.020     | 10787          | 1052         | 0.726  |
| 3            | 7.754     | 264120         | 13081        | 17.769 |
| 4            | 8.909     | 469159         | 30877        | 31.564 |
| 5            | 9.557     | 145309         | 8871         | 9.776  |
| 6            | 10.469    | 5972           | 412          | 0.402  |
| 7            | 11.340    | 895            | 74           | 0.060  |
| 8            | 11.783    | 5911           | 312          | 0.398  |
| 9            | 12.723    | 12850          | 735          | 0.865  |
| 10           | 15.286    | 2176           | 113          | 0.146  |
| 11           | 18.688    | 32828          | 567          | 2.209  |
| 12           | 21.745    | 31022          | 1302         | 2.087  |
| <b>Total</b> |           | <b>1486377</b> | <b>89966</b> |        |

12 h

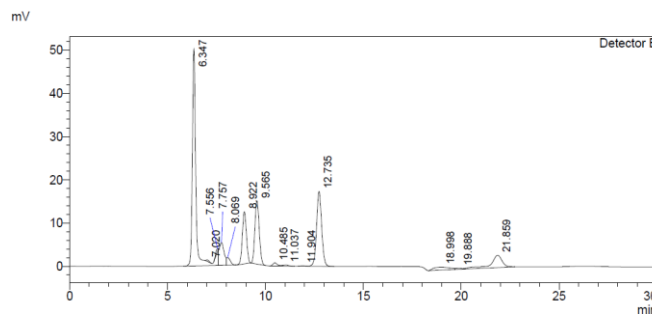

| Detector B   |           |                |               |        |
|--------------|-----------|----------------|---------------|--------|
| Peak#        | Ret. Time | Area           | Height        | Conc.  |
| 1            | 5.509     | 10467          | 304           | 0.453  |
| 2            | 6.378     | 1040648        | 87986         | 45.036 |
| 3            | 7.755     | 126749         | 3803          | 5.485  |
| 4            | 8.073     | 43706          | 2824          | 1.891  |
| 5            | 8.947     | 69057          | 4459          | 2.989  |
| 6            | 9.594     | 395619         | 25114         | 17.121 |
| 7            | 10.520    | 14064          | 937           | 0.609  |
| 8            | 10.925    | 7831           | 375           | 0.339  |
| 9            | 11.930    | 1466           | 113           | 0.063  |
| 10           | 12.778    | 478018         | 26534         | 20.687 |
| 11           | 19.278    | 123085         | 4137          | 5.327  |
| <b>Total</b> |           | <b>2310710</b> | <b>156586</b> |        |

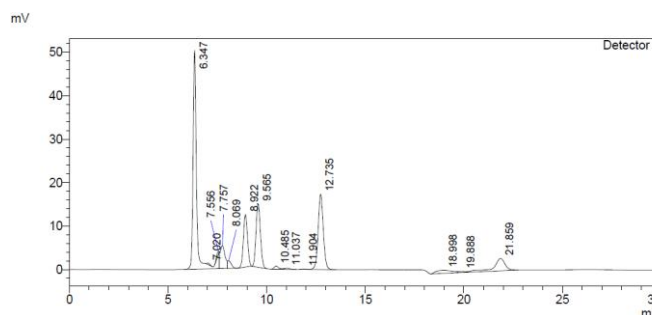

| Detector B   |           |                |               |        |
|--------------|-----------|----------------|---------------|--------|
| Peak#        | Ret. Time | Area           | Height        | Conc.  |
| 1            | 6.347     | 637823         | 50207         | 38.550 |
| 2            | 7.020     | 3624           | 328           | 0.219  |
| 3            | 7.556     | 8139           | 607           | 0.492  |
| 4            | 7.757     | 92990          | 5296          | 5.620  |
| 5            | 8.069     | 21686          | 1765          | 1.311  |
| 6            | 8.922     | 176614         | 12043         | 10.675 |
| 7            | 9.565     | 221375         | 14579         | 13.380 |
| 8            | 10.485    | 10774          | 712           | 0.651  |
| 9            | 11.037    | 5042           | 233           | 0.305  |
| 10           | 11.904    | 1245           | 92            | 0.075  |
| 11           | 12.735    | 315328         | 17310         | 19.058 |
| 12           | 18.998    | 38957          | 690           | 2.355  |
| 13           | 19.888    | 5259           | 236           | 0.318  |
| 14           | 21.859    | 115674         | 2850          | 6.991  |
| <b>Total</b> |           | <b>1654530</b> | <b>106949</b> |        |

18 h

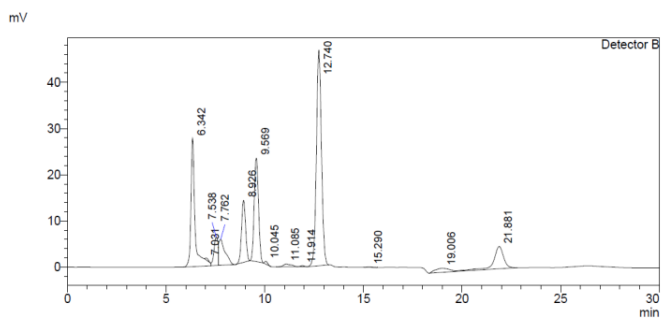

| Peak# | Ret. Time | Area    | Height | Conc.  |
|-------|-----------|---------|--------|--------|
| 1     | 6.342     | 400690  | 27786  | 18.000 |
| 2     | 7.031     | 4434    | 415    | 0.199  |
| 3     | 7.538     | 88644   | 6144   | 3.982  |
| 4     | 7.762     | 122482  | 5623   | 5.502  |
| 5     | 8.926     | 194977  | 13408  | 8.759  |
| 6     | 9.569     | 331868  | 22396  | 14.908 |
| 7     | 10.045    | 6335    | 594    | 0.285  |
| 8     | 11.085    | 18373   | 639    | 0.825  |
| 9     | 11.914    | 3237    | 221    | 0.145  |
| 10    | 12.740    | 838808  | 46583  | 37.681 |
| 11    | 15.290    | 1603    | 87     | 0.072  |
| 12    | 19.006    | 43940   | 887    | 1.974  |
| 13    | 21.881    | 170677  | 4817   | 7.667  |
| Total |           | 2226066 | 129600 |        |

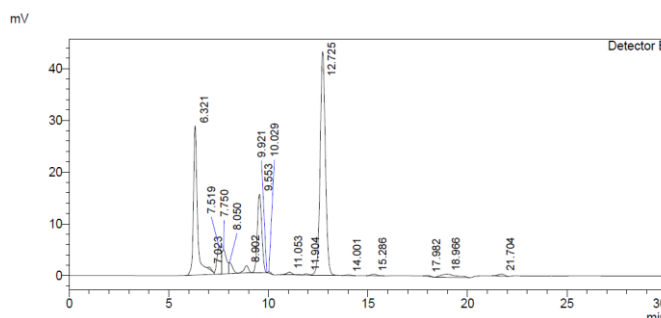

| Peak# | Ret. Time | Area    | Height | Conc.  |
|-------|-----------|---------|--------|--------|
| 1     | 6.321     | 412608  | 28790  | 24.108 |
| 2     | 7.023     | 4293    | 403    | 0.251  |
| 3     | 7.519     | 73872   | 5278   | 4.316  |
| 4     | 7.750     | 78912   | 4651   | 4.611  |
| 5     | 8.050     | 25295   | 2099   | 1.478  |
| 6     | 8.902     | 21930   | 1411   | 1.281  |
| 7     | 9.553     | 231321  | 15135  | 13.516 |
| 8     | 9.921     | 0       | -0     | 0.000  |
| 9     | 10.029    | 3171    | 290    | 0.185  |
| 10    | 11.053    | 11750   | 570    | 0.687  |
| 11    | 11.904    | 3978    | 263    | 0.232  |
| 12    | 12.725    | 792055  | 43146  | 46.278 |
| 13    | 14.001    | 2520    | 153    | 0.147  |
| 14    | 15.286    | 5677    | 291    | 0.332  |
| 15    | 17.982    | 2851    | 154    | 0.167  |
| 16    | 18.966    | 32726   | 636    | 1.912  |
| 17    | 21.704    | 8562    | 395    | 0.500  |
| Total |           | 1711520 | 103664 |        |

24 h

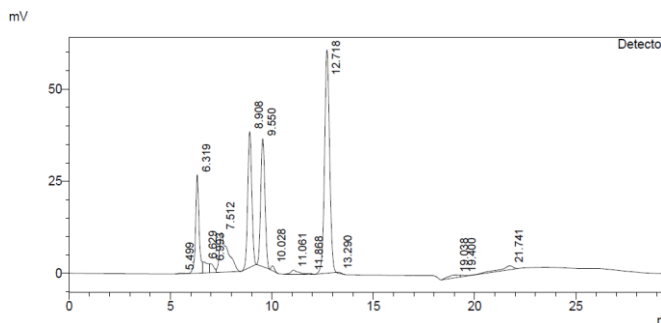

| Peak# | Ret. Time | Area    | Height | Conc.  |
|-------|-----------|---------|--------|--------|
| 1     | 5.499     | 3382    | 195    | 0.115  |
| 2     | 6.319     | 321431  | 26719  | 10.968 |
| 3     | 6.629     | 55864   | 3007   | 1.906  |
| 4     | 6.993     | 31473   | 2356   | 1.074  |
| 5     | 7.512     | 313913  | 10680  | 10.712 |
| 6     | 8.908     | 519454  | 36820  | 17.726 |
| 7     | 9.550     | 492183  | 34640  | 16.795 |
| 8     | 10.028    | 14401   | 1313   | 0.491  |
| 9     | 11.061    | 27617   | 1098   | 0.942  |
| 10    | 11.868    | 3246    | 208    | 0.111  |
| 11    | 12.718    | 1055979 | 60558  | 36.034 |
| 12    | 13.290    | 3017    | 250    | 0.103  |
| 13    | 19.038    | 29336   | 761    | 1.001  |
| 14    | 19.400    | 7103    | 408    | 0.242  |
| 15    | 21.741    | 52146   | 1039   | 1.779  |
| Total |           | 2930544 | 180052 |        |

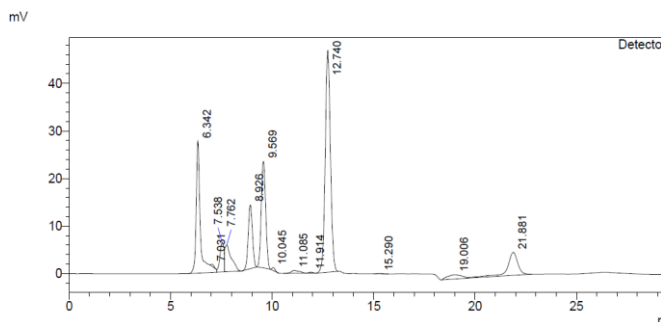

| Peak# | Ret. Time | Area    | Height | Conc.  |
|-------|-----------|---------|--------|--------|
| 1     | 6.342     | 400690  | 27786  | 18.000 |
| 2     | 7.031     | 4434    | 415    | 0.199  |
| 3     | 7.538     | 88644   | 6144   | 3.982  |
| 4     | 7.762     | 122482  | 5623   | 5.502  |
| 5     | 8.926     | 194977  | 13408  | 8.759  |
| 6     | 9.569     | 331868  | 22396  | 14.908 |
| 7     | 10.045    | 6335    | 594    | 0.285  |
| 8     | 11.085    | 18373   | 639    | 0.825  |
| 9     | 11.914    | 3237    | 221    | 0.145  |
| 10    | 12.740    | 838808  | 46583  | 37.681 |
| 11    | 15.290    | 1603    | 87     | 0.072  |
| 12    | 19.006    | 43940   | 887    | 1.974  |
| 13    | 21.881    | 170677  | 4817   | 7.667  |
| Total |           | 2226066 | 129600 |        |

36 h

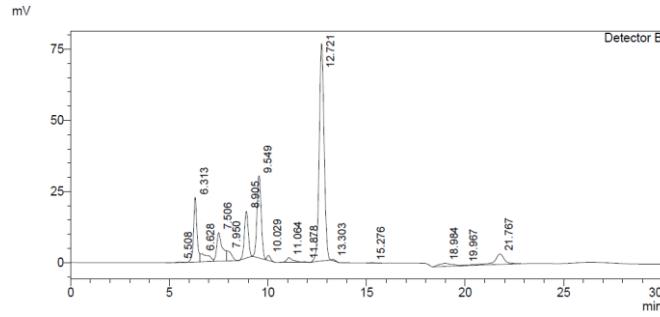

| Detector B |           |         |        |        |
|------------|-----------|---------|--------|--------|
| Peak#      | Ret. Time | Area    | Height | Conc.  |
| 1          | 5.508     | 3518    | 190    | 0.123  |
| 2          | 6.313     | 277479  | 22742  | 9.718  |
| 3          | 6.628     | 80450   | 2879   | 2.817  |
| 4          | 7.506     | 205654  | 10044  | 7.202  |
| 5          | 7.950     | 57495   | 3509   | 2.014  |
| 6          | 8.905     | 227884  | 16393  | 7.981  |
| 7          | 9.549     | 416397  | 28829  | 14.583 |
| 8          | 10.029    | 21677   | 1776   | 0.759  |
| 9          | 11.064    | 39319   | 1639   | 1.377  |
| 10         | 11.878    | 3222    | 221    | 0.113  |
| 11         | 12.721    | 1330573 | 76374  | 46.598 |
| 12         | 13.303    | 4853    | 413    | 0.170  |
| 13         | 15.276    | 1531    | 85     | 0.054  |
| 14         | 18.984    | 49817   | 1076   | 1.745  |
| 15         | 19.967    | 3397    | 169    | 0.119  |
| 16         | 21.767    | 132144  | 3612   | 4.628  |
| Total      |           | 2855410 | 169950 |        |

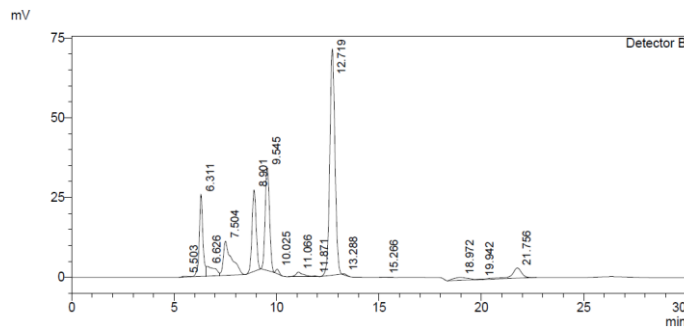

| Detector B |           |         |        |        |
|------------|-----------|---------|--------|--------|
| Peak#      | Ret. Time | Area    | Height | Conc.  |
| 1          | 5.503     | 4406    | 224    | 0.146  |
| 2          | 6.311     | 315910  | 25656  | 10.491 |
| 3          | 6.626     | 87835   | 3070   | 2.917  |
| 4          | 7.504     | 303260  | 10672  | 10.071 |
| 5          | 8.901     | 360960  | 25456  | 11.987 |
| 6          | 9.545     | 463826  | 32139  | 15.403 |
| 7          | 10.025    | 15699   | 1405   | 0.521  |
| 8          | 11.066    | 36670   | 1433   | 1.218  |
| 9          | 11.871    | 3462    | 228    | 0.115  |
| 10         | 12.719    | 1256368 | 70797  | 41.721 |
| 11         | 13.288    | 4306    | 321    | 0.143  |
| 12         | 15.266    | 1215    | 70     | 0.040  |
| 13         | 18.972    | 43625   | 946    | 1.449  |
| 14         | 19.942    | 2380    | 122    | 0.079  |
| 15         | 21.756    | 111413  | 3172   | 3.700  |
| Total      |           | 3011337 | 175710 |        |

42 h

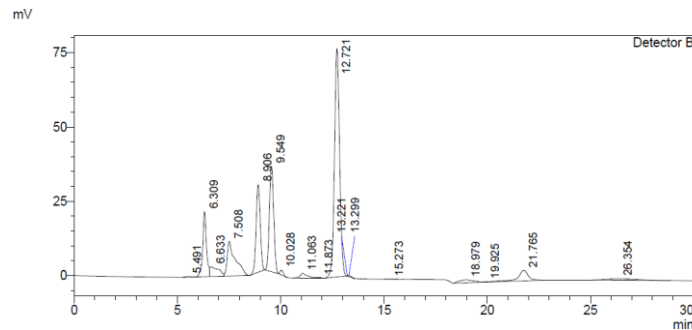

| Detector B |           |         |        |        |
|------------|-----------|---------|--------|--------|
| Peak#      | Ret. Time | Area    | Height | Conc.  |
| 1          | 5.491     | 4455    | 245    | 0.137  |
| 2          | 6.309     | 277459  | 21888  | 8.529  |
| 3          | 6.633     | 95784   | 3260   | 2.945  |
| 4          | 7.508     | 320726  | 11635  | 9.860  |
| 5          | 8.906     | 412156  | 29431  | 12.670 |
| 6          | 9.549     | 505396  | 35459  | 15.537 |
| 7          | 10.028    | 17683   | 1597   | 0.544  |
| 8          | 11.063    | 40220   | 1591   | 1.236  |
| 9          | 11.873    | 3467    | 239    | 0.107  |
| 10         | 12.721    | 1340878 | 76744  | 41.220 |
| 11         | 13.221    | 3       | -5     | 0.000  |
| 12         | 13.299    | 4562    | 330    | 0.140  |
| 13         | 15.273    | 1204    | 70     | 0.037  |
| 14         | 18.979    | 47292   | 1031   | 1.454  |
| 15         | 19.925    | 2252    | 118    | 0.069  |
| 16         | 21.765    | 127280  | 3559   | 3.913  |
| 17         | 26.354    | 52134   | 508    | 1.603  |
| Total      |           | 3252949 | 187701 |        |

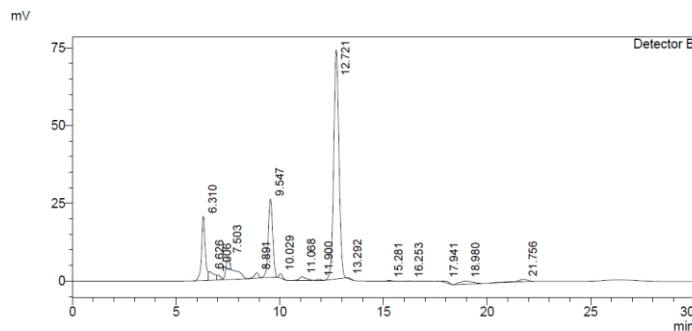

| Detector B |           |         |        |        |
|------------|-----------|---------|--------|--------|
| Peak#      | Ret. Time | Area    | Height | Conc.  |
| 1          | 6.310     | 258615  | 20590  | 10.951 |
| 2          | 6.626     | 49631   | 2681   | 2.102  |
| 3          | 7.006     | 19838   | 1580   | 0.840  |
| 4          | 7.503     | 185760  | 7355   | 7.866  |
| 5          | 8.891     | 25460   | 1706   | 1.078  |
| 6          | 9.547     | 371819  | 25124  | 15.744 |
| 7          | 10.029    | 16336   | 1443   | 0.692  |
| 8          | 11.068    | 28805   | 1239   | 1.220  |
| 9          | 11.900    | 4855    | 358    | 0.206  |
| 10         | 12.721    | 1306073 | 73565  | 55.304 |
| 11         | 13.292    | 3803    | 288    | 0.161  |
| 12         | 15.281    | 3428    | 181    | 0.145  |
| 13         | 16.253    | 1017    | 47     | 0.043  |
| 14         | 17.941    | 9948    | 436    | 0.421  |
| 15         | 18.980    | 44698   | 1053   | 1.893  |
| 16         | 21.756    | 31526   | 759    | 1.335  |
| Total      |           | 2361613 | 138405 |        |

48 h

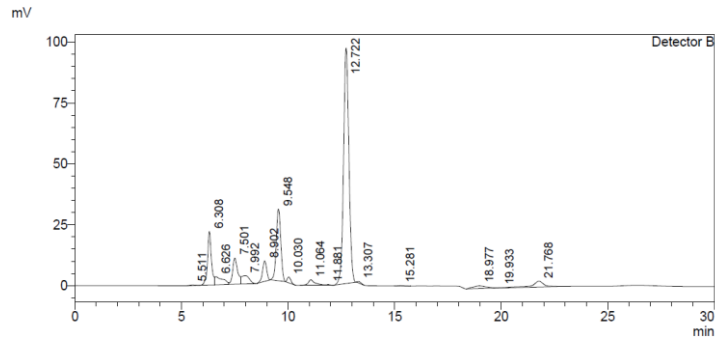

| Detector B |           |         |        |        |
|------------|-----------|---------|--------|--------|
| Peak#      | Ret. Time | Area    | Height | Conc.  |
| 1          | 5.511     | 4705    | 236    | 0.152  |
| 2          | 6.308     | 278848  | 21917  | 8.989  |
| 3          | 6.626     | 87253   | 3268   | 2.813  |
| 4          | 7.501     | 177847  | 10744  | 5.733  |
| 5          | 7.992     | 84064   | 3411   | 2.710  |
| 6          | 8.902     | 114706  | 8385   | 3.698  |
| 7          | 9.548     | 425724  | 29355  | 13.724 |
| 8          | 10.030    | 27613   | 2363   | 0.890  |
| 9          | 11.064    | 51058   | 2248   | 1.646  |
| 10         | 11.881    | 3945    | 270    | 0.127  |
| 11         | 12.722    | 1692654 | 96641  | 54.565 |
| 12         | 13.307    | 7783    | 602    | 0.251  |
| 13         | 15.281    | 2456    | 136    | 0.079  |
| 14         | 18.977    | 47990   | 1118   | 1.547  |
| 15         | 19.933    | 2074    | 111    | 0.067  |
| 16         | 21.768    | 93359   | 2406   | 3.010  |
| Total      |           | 3102078 | 183209 |        |

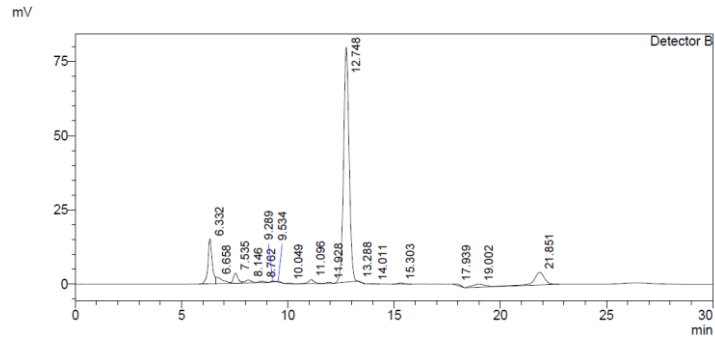

| Detector B |           |         |        |        |
|------------|-----------|---------|--------|--------|
| Peak#      | Ret. Time | Area    | Height | Conc.  |
| 1          | 6.332     | 213083  | 15115  | 10.499 |
| 2          | 6.658     | 45044   | 2129   | 2.219  |
| 3          | 7.535     | 51110   | 3362   | 2.518  |
| 4          | 8.146     | 21312   | 1033   | 1.050  |
| 5          | 8.762     | 10689   | 522    | 0.527  |
| 6          | 9.289     | 3494    | 328    | 0.172  |
| 7          | 9.534     | 2869    | 236    | 0.141  |
| 8          | 10.049    | 2086    | 169    | 0.103  |
| 9          | 11.096    | 24748   | 1314   | 1.219  |
| 10         | 11.928    | 4903    | 363    | 0.242  |
| 11         | 12.748    | 1438321 | 79025  | 70.867 |
| 12         | 13.288    | 1148    | 36     | 0.057  |
| 13         | 14.011    | 1155    | 83     | 0.057  |
| 14         | 15.303    | 7268    | 373    | 0.358  |
| 15         | 17.939    | 8494    | 382    | 0.418  |
| 16         | 19.002    | 42384   | 1035   | 2.088  |
| 17         | 21.851    | 151496  | 4233   | 7.464  |
| Total      |           | 2029604 | 109740 |        |

60 h

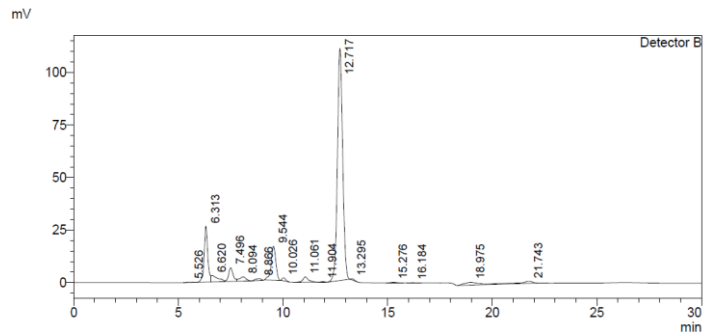

| Detector B |           |         |        |        |
|------------|-----------|---------|--------|--------|
| Peak#      | Ret. Time | Area    | Height | Conc.  |
| 1          | 5.526     | 3579    | 175    | 0.122  |
| 2          | 6.313     | 322496  | 26621  | 10.979 |
| 3          | 6.620     | 67338   | 3003   | 2.292  |
| 4          | 7.496     | 97761   | 6489   | 3.328  |
| 5          | 8.094     | 45219   | 2036   | 1.539  |
| 6          | 8.866     | 17828   | 942    | 0.607  |
| 7          | 9.544     | 246544  | 16046  | 8.393  |
| 8          | 10.026    | 16238   | 1433   | 0.553  |
| 9          | 11.061    | 49015   | 2500   | 1.669  |
| 10         | 11.904    | 3585    | 286    | 0.122  |
| 11         | 12.717    | 1937506 | 110339 | 65.958 |
| 12         | 13.295    | 6983    | 554    | 0.238  |
| 13         | 15.276    | 5015    | 267    | 0.171  |
| 14         | 16.184    | 1196    | 62     | 0.041  |
| 15         | 18.975    | 57348   | 1312   | 1.952  |
| 16         | 21.743    | 59841   | 1035   | 2.037  |
| Total      |           | 2937491 | 173101 |        |

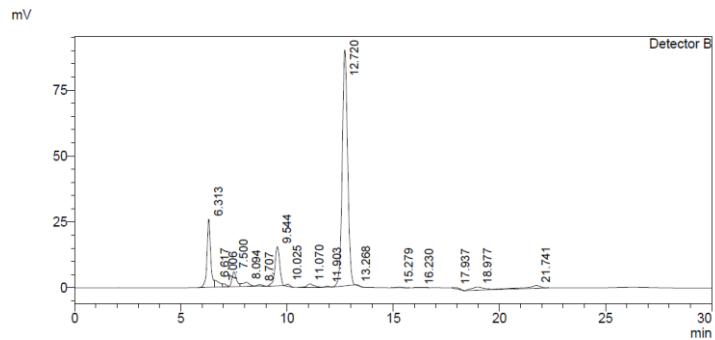

| Detector B |           |         |        |        |
|------------|-----------|---------|--------|--------|
| Peak#      | Ret. Time | Area    | Height | Conc.  |
| 1          | 6.313     | 311687  | 25885  | 12.563 |
| 2          | 6.617     | 41114   | 2540   | 1.657  |
| 3          | 7.006     | 14545   | 1192   | 0.586  |
| 4          | 7.500     | 81918   | 5582   | 3.302  |
| 5          | 8.094     | 36517   | 1487   | 1.472  |
| 6          | 8.707     | 8922    | 519    | 0.360  |
| 7          | 9.544     | 226731  | 14788  | 9.139  |
| 8          | 10.025    | 9422    | 825    | 0.380  |
| 9          | 11.070    | 30357   | 1366   | 1.224  |
| 10         | 11.903    | 5275    | 396    | 0.213  |
| 11         | 12.720    | 1593393 | 89443  | 64.225 |
| 12         | 13.268    | 1741    | 67     | 0.070  |
| 13         | 15.279    | 4413    | 229    | 0.178  |
| 14         | 16.230    | 1234    | 57     | 0.050  |
| 15         | 17.937    | 8620    | 378    | 0.347  |
| 16         | 18.977    | 49018   | 1156   | 1.976  |
| 17         | 21.741    | 56030   | 1032   | 2.258  |
| Total      |           | 2480937 | 146942 |        |

66 h

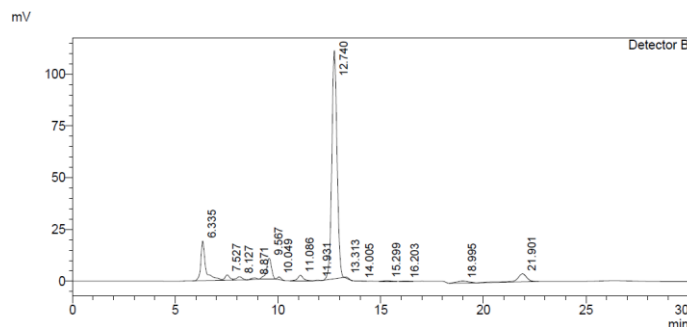

| Detector B |           |         |        |        |
|------------|-----------|---------|--------|--------|
| Peak#      | Ret. Time | Area    | Height | Conc.  |
| 1          | 6.335     | 321013  | 19070  | 11.440 |
| 2          | 7.527     | 42480   | 2551   | 1.514  |
| 3          | 8.127     | 31700   | 1627   | 1.130  |
| 4          | 8.871     | 14087   | 705    | 0.502  |
| 5          | 9.567     | 167030  | 10045  | 5.952  |
| 6          | 10.049    | 16584   | 1311   | 0.591  |
| 7          | 11.086    | 48931   | 2604   | 1.744  |
| 8          | 11.931    | 3509    | 275    | 0.125  |
| 9          | 12.740    | 1972766 | 110066 | 70.303 |
| 10         | 13.313    | 7310    | 507    | 0.261  |
| 11         | 14.005    | 1084    | 81     | 0.039  |
| 12         | 15.299    | 6505    | 335    | 0.232  |
| 13         | 16.203    | 1374    | 73     | 0.049  |
| 14         | 18.995    | 39458   | 1026   | 1.406  |
| 15         | 21.901    | 132241  | 3872   | 4.713  |
| Total      |           | 2806071 | 154146 |        |

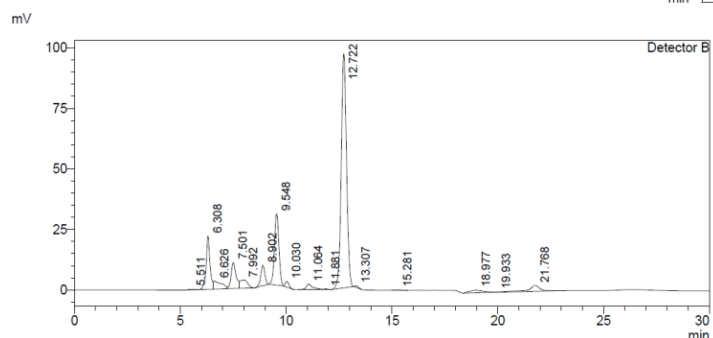

| Detector B |           |         |        |        |
|------------|-----------|---------|--------|--------|
| Peak#      | Ret. Time | Area    | Height | Conc.  |
| 1          | 5.511     | 4705    | 236    | 0.152  |
| 2          | 6.308     | 278848  | 21917  | 8.989  |
| 3          | 6.626     | 87253   | 3268   | 2.813  |
| 4          | 7.501     | 177847  | 10744  | 5.733  |
| 5          | 7.992     | 84064   | 3411   | 2.710  |
| 6          | 8.902     | 114706  | 8385   | 3.698  |
| 7          | 9.548     | 425724  | 29355  | 13.724 |
| 8          | 10.030    | 27613   | 2363   | 0.890  |
| 9          | 11.064    | 51058   | 2248   | 1.646  |
| 10         | 11.881    | 3945    | 270    | 0.127  |
| 11         | 12.722    | 1692654 | 96641  | 54.565 |
| 12         | 13.307    | 7783    | 602    | 0.251  |
| 13         | 15.281    | 2456    | 136    | 0.079  |
| 14         | 18.977    | 47990   | 1118   | 1.547  |
| 15         | 19.933    | 2074    | 111    | 0.067  |
| 16         | 21.768    | 93359   | 2406   | 3.010  |
| Total      |           | 3102078 | 183209 |        |

72 h

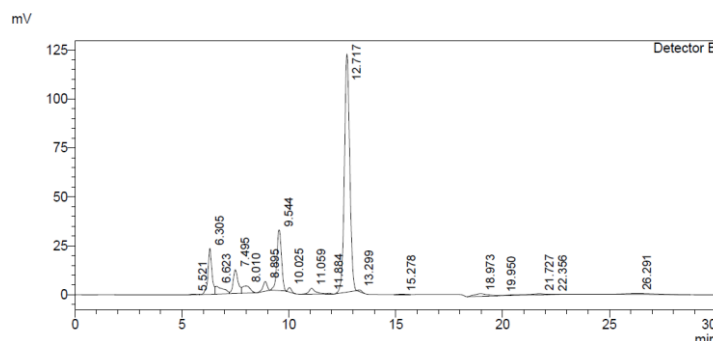

| Detector B |           |         |        |        |
|------------|-----------|---------|--------|--------|
| Peak#      | Ret. Time | Area    | Height | Conc.  |
| 1          | 5.521     | 6094    | 292    | 0.168  |
| 2          | 6.305     | 306250  | 23393  | 8.458  |
| 3          | 6.623     | 102463  | 3901   | 2.830  |
| 4          | 7.495     | 193260  | 12060  | 5.337  |
| 5          | 8.010     | 94017   | 3616   | 2.596  |
| 6          | 8.895     | 67814   | 4880   | 1.873  |
| 7          | 9.544     | 458153  | 30976  | 12.653 |
| 8          | 10.025    | 26052   | 2254   | 0.719  |
| 9          | 11.059    | 63550   | 2922   | 1.755  |
| 10         | 11.884    | 4643    | 323    | 0.128  |
| 11         | 12.717    | 2128535 | 121298 | 58.783 |
| 12         | 13.299    | 11203   | 875    | 0.309  |
| 13         | 15.278    | 3555    | 189    | 0.098  |
| 14         | 18.973    | 56303   | 1348   | 1.555  |
| 15         | 19.950    | 3314    | 163    | 0.092  |
| 16         | 21.727    | 43225   | 600    | 1.194  |
| 17         | 22.356    | 5373    | 177    | 0.148  |
| 18         | 26.291    | 47217   | 468    | 1.304  |
| Total      |           | 3621022 | 209735 |        |

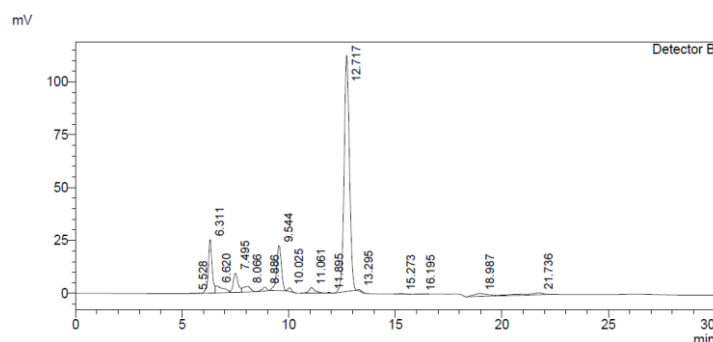

| Detector B |           |         |        |        |
|------------|-----------|---------|--------|--------|
| Peak#      | Ret. Time | Area    | Height | Conc.  |
| 1          | 5.528     | 4256    | 204    | 0.136  |
| 2          | 6.311     | 314234  | 25292  | 10.021 |
| 3          | 6.620     | 82570   | 3335   | 2.633  |
| 4          | 7.495     | 139818  | 8999   | 4.459  |
| 5          | 8.066     | 67477   | 2653   | 2.152  |
| 6          | 8.886     | 26953   | 1758   | 0.860  |
| 7          | 9.544     | 322738  | 21232  | 10.292 |
| 8          | 10.025    | 20255   | 1742   | 0.646  |
| 9          | 11.061    | 53669   | 2588   | 1.712  |
| 10         | 11.895    | 4010    | 299    | 0.128  |
| 11         | 12.717    | 1957949 | 111488 | 62.441 |
| 12         | 13.295    | 9069    | 671    | 0.289  |
| 13         | 15.273    | 4020    | 215    | 0.128  |
| 14         | 16.195    | 1066    | 57     | 0.034  |
| 15         | 18.987    | 61884   | 1373   | 1.974  |
| 16         | 21.736    | 65728   | 953    | 2.096  |
| Total      |           | 3135695 | 182859 |        |

84 h

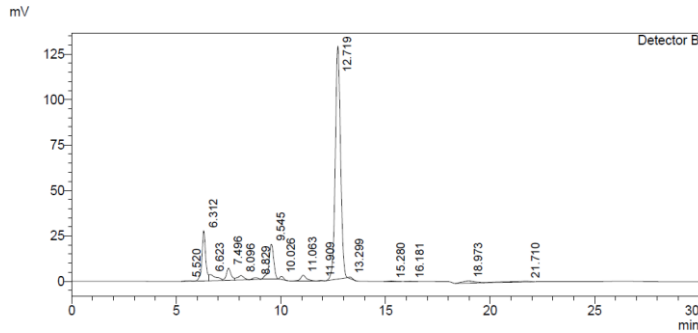

| Detector B |           |         |        |        |
|------------|-----------|---------|--------|--------|
| Peak#      | Ret. Time | Area    | Height | Conc.  |
| 1          | 5.520     | 5788    | 268    | 0.174  |
| 2          | 6.312     | 340921  | 27489  | 10.226 |
| 3          | 6.623     | 77657   | 3420   | 2.329  |
| 4          | 7.496     | 102339  | 6605   | 3.070  |
| 5          | 8.096     | 51412   | 2378   | 1.542  |
| 6          | 8.829     | 17271   | 832    | 0.518  |
| 7          | 9.545     | 299152  | 19046  | 8.973  |
| 8          | 10.026    | 20972   | 1794   | 0.629  |
| 9          | 11.063    | 61584   | 3140   | 1.847  |
| 10         | 11.909    | 3375    | 275    | 0.101  |
| 11         | 12.719    | 2251534 | 127897 | 67.534 |
| 12         | 13.299    | 10237   | 813    | 0.307  |
| 13         | 15.280    | 4723    | 250    | 0.142  |
| 14         | 16.181    | 1294    | 73     | 0.039  |
| 15         | 18.973    | 49079   | 1244   | 1.472  |
| 16         | 21.710    | 36596   | 457    | 1.098  |
| Total      |           | 3333935 | 195982 |        |

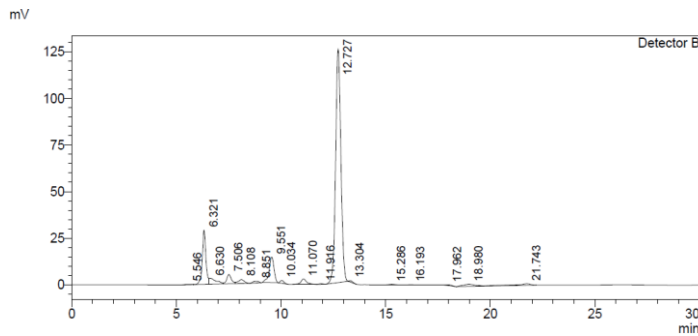

| Detector B |           |         |        |        |
|------------|-----------|---------|--------|--------|
| Peak#      | Ret. Time | Area    | Height | Conc.  |
| 1          | 5.546     | 4001    | 186    | 0.126  |
| 2          | 6.321     | 351123  | 28936  | 11.070 |
| 3          | 6.630     | 71196   | 3205   | 2.245  |
| 4          | 7.506     | 76063   | 4964   | 2.398  |
| 5          | 8.108     | 41514   | 2080   | 1.309  |
| 6          | 8.851     | 16780   | 815    | 0.529  |
| 7          | 9.551     | 215022  | 13682  | 6.779  |
| 8          | 10.034    | 18299   | 1535   | 0.577  |
| 9          | 11.070    | 55688   | 2923   | 1.756  |
| 10         | 11.916    | 4074    | 322    | 0.128  |
| 11         | 12.727    | 2205593 | 125133 | 69.537 |
| 12         | 13.304    | 7998    | 656    | 0.252  |
| 13         | 15.286    | 6157    | 324    | 0.194  |
| 14         | 16.193    | 1399    | 75     | 0.044  |
| 15         | 17.962    | 7619    | 352    | 0.240  |
| 16         | 18.980    | 44409   | 1144   | 1.400  |
| 17         | 21.743    | 44882   | 824    | 1.415  |
| Total      |           | 3171817 | 187157 |        |

90 h

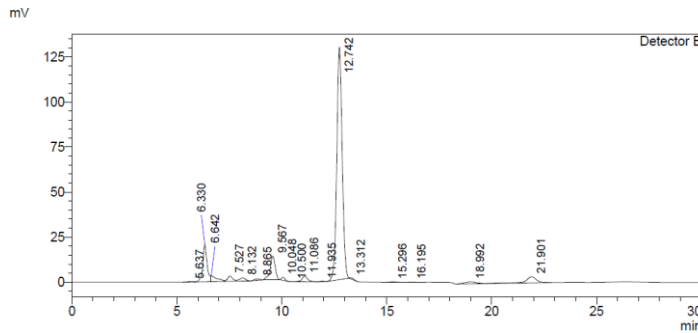

| Detector B |           |         |        |        |
|------------|-----------|---------|--------|--------|
| Peak#      | Ret. Time | Area    | Height | Conc.  |
| 1          | 5.637     | 5399    | 224    | 0.165  |
| 2          | 6.330     | 295491  | 20454  | 9.043  |
| 3          | 6.642     | 66241   | 3151   | 2.027  |
| 4          | 7.527     | 49817   | 2956   | 1.525  |
| 5          | 8.132     | 36663   | 1806   | 1.122  |
| 6          | 8.865     | 15631   | 779    | 0.478  |
| 7          | 9.567     | 211750  | 12941  | 6.481  |
| 8          | 10.048    | 19532   | 1638   | 0.598  |
| 9          | 10.500    | 9       | 4      | 0.000  |
| 10         | 11.086    | 59966   | 3180   | 1.835  |
| 11         | 11.935    | 3292    | 261    | 0.101  |
| 12         | 12.742    | 2325091 | 128763 | 71.159 |
| 13         | 13.312    | 8629    | 655    | 0.264  |
| 14         | 15.296    | 5422    | 281    | 0.166  |
| 15         | 16.195    | 1517    | 82     | 0.046  |
| 16         | 18.992    | 42610   | 1141   | 1.304  |
| 17         | 21.901    | 120381  | 3440   | 3.684  |
| Total      |           | 3267439 | 181757 |        |

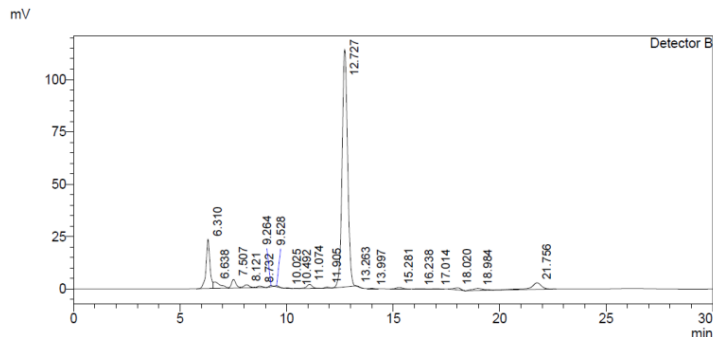

| Detector B |           |         |        |        |
|------------|-----------|---------|--------|--------|
| Peak#      | Ret. Time | Area    | Height | Conc.  |
| 1          | 6.310     | 304389  | 23500  | 10.955 |
| 2          | 6.638     | 68041   | 3072   | 2.449  |
| 3          | 7.507     | 60125   | 4171   | 2.164  |
| 4          | 8.121     | 28688   | 1457   | 1.033  |
| 5          | 8.732     | 13114   | 691    | 0.472  |
| 6          | 9.264     | 5923    | 544    | 0.213  |
| 7          | 9.528     | 5351    | 463    | 0.193  |
| 8          | 10.025    | 3070    | 256    | 0.111  |
| 9          | 10.492    | 132     | 13     | 0.005  |
| 10         | 11.074    | 35967   | 1990   | 1.294  |
| 11         | 11.905    | 7907    | 580    | 0.285  |
| 12         | 12.727    | 2049582 | 113349 | 73.765 |
| 13         | 13.263    | 2511    | 76     | 0.090  |
| 14         | 13.997    | 2234    | 156    | 0.080  |
| 15         | 15.281    | 13581   | 691    | 0.489  |
| 16         | 16.238    | 2439    | 98     | 0.088  |
| 17         | 17.014    | 1781    | 86     | 0.064  |
| 18         | 18.020    | 21949   | 1004   | 0.790  |
| 19         | 18.984    | 39571   | 993    | 1.424  |
| 20         | 21.756    | 112162  | 3084   | 4.037  |
| Total      |           | 2778520 | 156274 |        |

Figure S2 LA fermentation on 8% (w/w) NH<sub>3</sub>-H<sub>2</sub>O<sub>2</sub> pretreated and unwashed corncob

A: The curves of fermentation on corncob substrate by NH<sub>3</sub> pretreatment for 1 day followed by H<sub>2</sub>O<sub>2</sub> treatment for 1 day at pH6.0 adjusted by automatic feeding of NaOH solution.

0 h

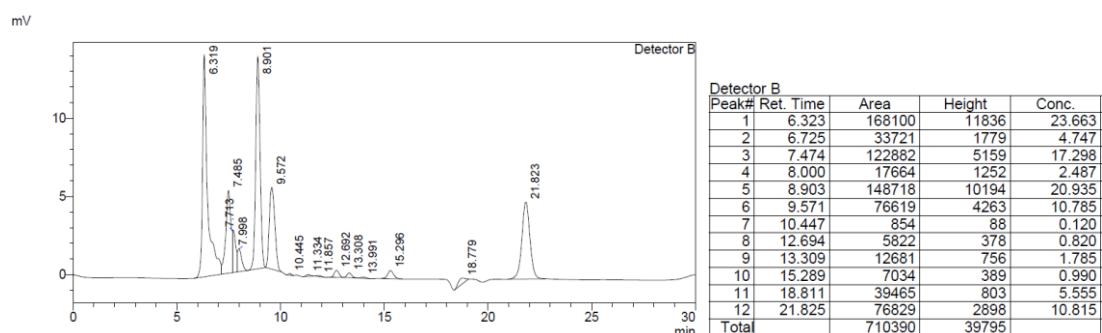

mV

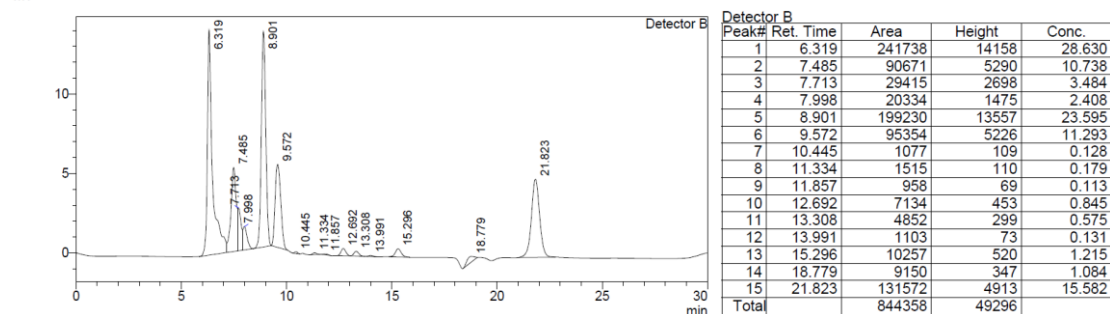

12 h

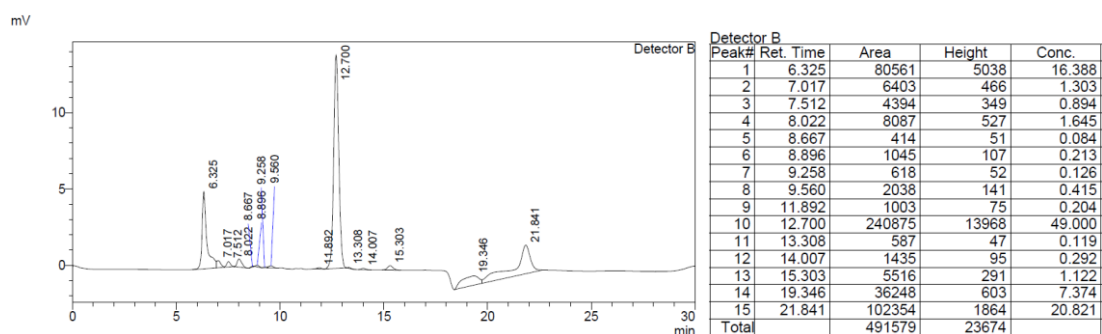

mV

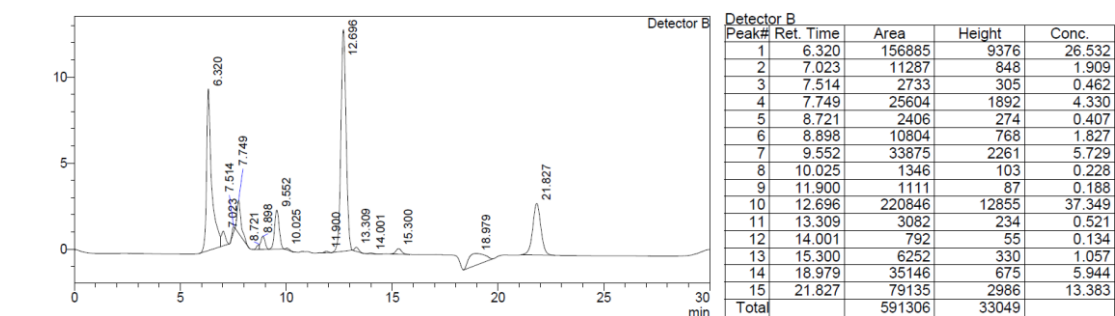

18 h

mV

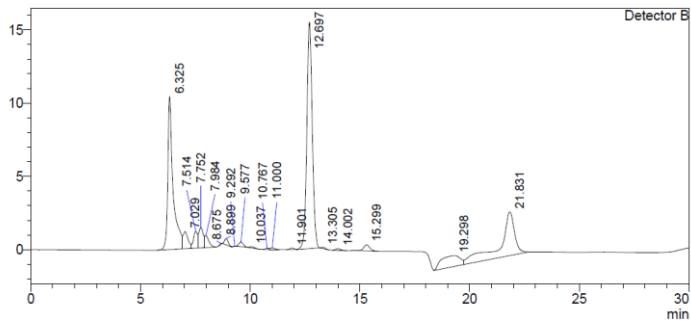

| Peak# | Ret. Time | Area   | Height | Conc.  |
|-------|-----------|--------|--------|--------|
| 1     | 6.325     | 173674 | 10424  | 24.275 |
| 2     | 7.029     | 19017  | 1165   | 2.658  |
| 3     | 7.514     | 14621  | 1149   | 2.044  |
| 4     | 7.752     | 20386  | 1388   | 2.849  |
| 5     | 7.984     | 10155  | 804    | 1.419  |
| 6     | 8.675     | 448    | 51     | 0.063  |
| 7     | 8.899     | 4947   | 425    | 0.691  |
| 8     | 9.292     | 99     | 14     | 0.014  |
| 9     | 9.577     | 4136   | 301    | 0.578  |
| 10    | 10.037    | 1202   | 77     | 0.168  |
| 11    | 10.767    | 582    | 66     | 0.123  |
| 12    | 11.000    | 1383   | 102    | 0.193  |
| 13    | 11.901    | 1266   | 99     | 0.177  |
| 14    | 12.697    | 266600 | 15455  | 37.264 |
| 15    | 13.305    | 1186   | 100    | 0.166  |
| 16    | 14.002    | 1999   | 129    | 0.279  |
| 17    | 15.299    | 7873   | 415    | 1.100  |
| 18    | 19.298    | 45903  | 736    | 6.416  |
| 19    | 21.831    | 139658 | 2978   | 19.521 |
| Total |           | 715435 | 35878  |        |

mV

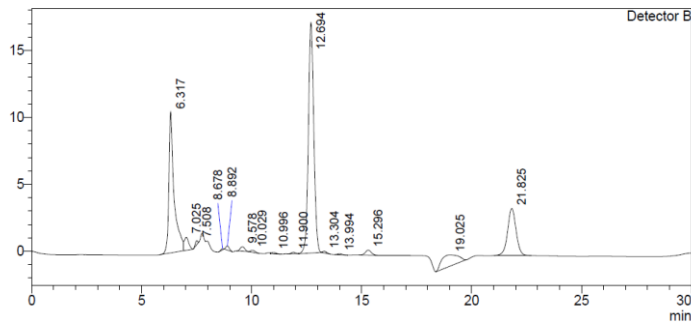

| Peak# | Ret. Time | Area   | Height | Conc.  |
|-------|-----------|--------|--------|--------|
| 1     | 6.317     | 173827 | 10532  | 26.766 |
| 2     | 7.025     | 13664  | 981    | 2.104  |
| 3     | 7.508     | 2404   | 281    | 0.370  |
| 4     | 8.678     | 696    | 77     | 0.107  |
| 5     | 8.892     | 3317   | 300    | 0.511  |
| 6     | 9.578     | 4818   | 342    | 0.742  |
| 7     | 10.029    | 2072   | 146    | 0.319  |
| 8     | 10.996    | 1777   | 125    | 0.274  |
| 9     | 11.900    | 1528   | 118    | 0.235  |
| 10    | 12.694    | 296696 | 17211  | 45.686 |
| 11    | 13.304    | 1416   | 120    | 0.218  |
| 12    | 13.994    | 1051   | 73     | 0.162  |
| 13    | 15.296    | 7338   | 384    | 1.130  |
| 14    | 19.025    | 45171  | 843    | 6.956  |
| 15    | 21.825    | 93646  | 3518   | 14.420 |
| Total |           | 649423 | 35053  |        |

24 h

mV

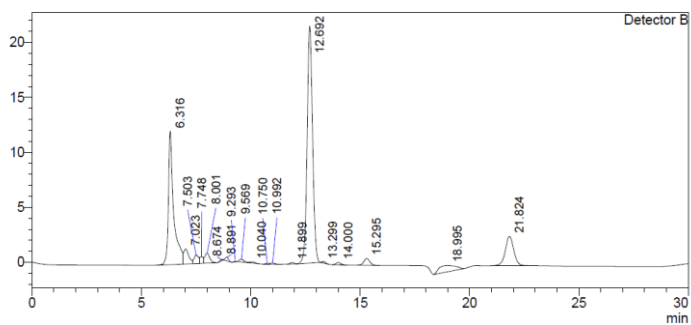

| Peak# | Ret. Time | Area   | Height | Conc.  |
|-------|-----------|--------|--------|--------|
| 1     | 6.316     | 203426 | 12120  | 26.681 |
| 2     | 7.023     | 22328  | 1382   | 2.928  |
| 3     | 7.503     | 11175  | 780    | 1.466  |
| 4     | 7.748     | 7075   | 601    | 0.928  |
| 5     | 8.001     | 14281  | 924    | 1.873  |
| 6     | 8.674     | 766    | 83     | 0.101  |
| 7     | 8.891     | 3388   | 311    | 0.444  |
| 8     | 9.293     | 258    | 28     | 0.034  |
| 9     | 9.569     | 3562   | 257    | 0.467  |
| 10    | 10.040    | 1782   | 103    | 0.234  |
| 11    | 10.750    | 1088   | 81     | 0.143  |
| 12    | 10.992    | 1334   | 103    | 0.175  |
| 13    | 11.899    | 1720   | 134    | 0.226  |
| 14    | 12.692    | 372469 | 21521  | 48.853 |
| 15    | 13.299    | 1649   | 138    | 0.216  |
| 16    | 14.000    | 3487   | 221    | 0.457  |
| 17    | 15.295    | 11947  | 622    | 1.567  |
| 18    | 18.995    | 29970  | 554    | 3.931  |
| 19    | 21.824    | 70722  | 2658   | 9.276  |
| Total |           | 762429 | 42622  |        |

mV

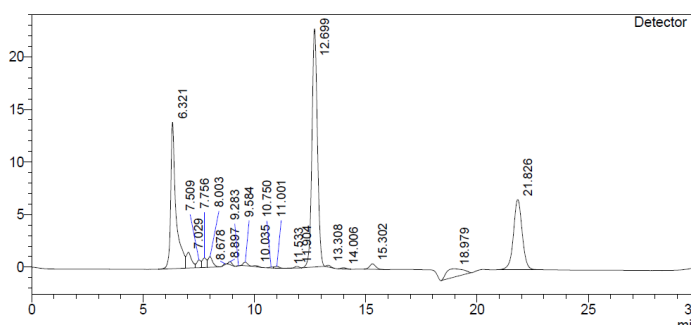

| Peak# | Ret. Time | Area   | Height | Conc.  |
|-------|-----------|--------|--------|--------|
| 1     | 6.321     | 230366 | 13934  | 24.706 |
| 2     | 7.029     | 25186  | 1505   | 2.701  |
| 3     | 7.509     | 9628   | 730    | 1.033  |
| 4     | 7.756     | 12481  | 908    | 1.338  |
| 5     | 8.003     | 14906  | 999    | 1.599  |
| 6     | 8.678     | 820    | 92     | 0.088  |
| 7     | 8.897     | 2937   | 282    | 0.315  |
| 8     | 9.283     | 220    | 29     | 0.024  |
| 9     | 9.584     | 4420   | 333    | 0.474  |
| 10    | 10.035    | 1610   | 108    | 0.173  |
| 11    | 10.750    | 1109   | 90     | 0.119  |
| 12    | 11.001    | 2250   | 158    | 0.241  |
| 13    | 11.533    | 132    | 14     | 0.014  |
| 14    | 11.904    | 2022   | 154    | 0.217  |
| 15    | 12.699    | 390656 | 22670  | 41.896 |
| 16    | 13.308    | 2140   | 176    | 0.229  |
| 17    | 14.006    | 1674   | 110    | 0.180  |
| 18    | 15.302    | 9659   | 507    | 1.036  |
| 19    | 18.979    | 41633  | 803    | 4.465  |
| 20    | 21.826    | 178597 | 6666   | 19.154 |
| Total |           | 932446 | 50268  |        |

36 h



mV

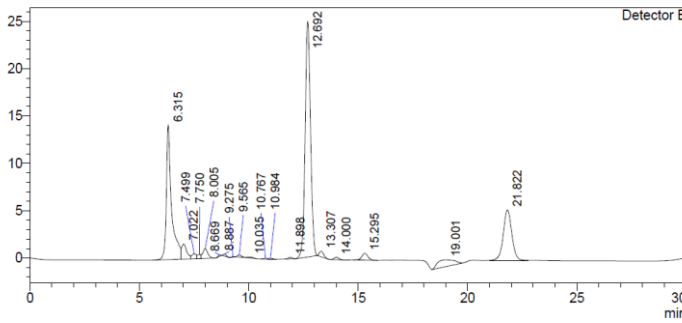

| Detector B |           |        |        |        |
|------------|-----------|--------|--------|--------|
| Peak#      | Ret. Time | Area   | Height | Conc.  |
| 1          | 6.315     | 234254 | 14192  | 25.044 |
| 2          | 7.022     | 26387  | 1602   | 2.821  |
| 3          | 7.499     | 7652   | 528    | 0.818  |
| 4          | 7.750     | 4918   | 447    | 0.526  |
| 5          | 8.005     | 16385  | 1054   | 1.752  |
| 6          | 8.669     | 1254   | 141    | 0.134  |
| 7          | 8.887     | 2328   | 225    | 0.249  |
| 8          | 9.275     | 342    | 43     | 0.037  |
| 9          | 9.565     | 2683   | 216    | 0.287  |
| 10         | 10.035    | 1644   | 99     | 0.176  |
| 11         | 10.767    | 1128   | 93     | 0.121  |
| 12         | 10.984    | 1245   | 95     | 0.133  |
| 13         | 11.898    | 2064   | 159    | 0.221  |
| 14         | 12.692    | 427201 | 24850  | 45.671 |
| 15         | 13.307    | 8051   | 597    | 0.861  |
| 16         | 14.000    | 3889   | 251    | 0.416  |
| 17         | 15.295    | 13876  | 715    | 1.484  |
| 18         | 19.001    | 37367  | 708    | 3.995  |
| 19         | 21.822    | 142710 | 5321   | 15.257 |
| Total      |           | 935378 | 51338  |        |

mV

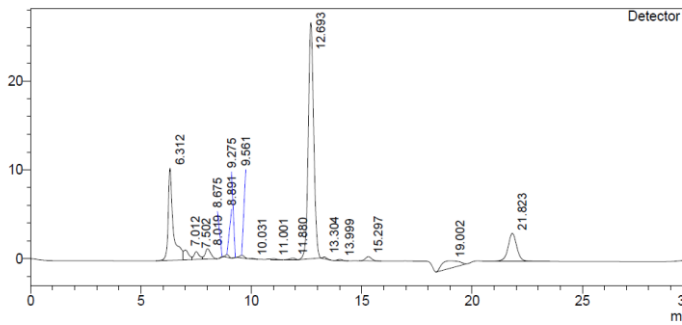

| Detector B |           |        |        |        |
|------------|-----------|--------|--------|--------|
| Peak#      | Ret. Time | Area   | Height | Conc.  |
| 1          | 6.312     | 164897 | 10353  | 19.843 |
| 2          | 7.012     | 17848  | 1119   | 2.148  |
| 3          | 7.502     | 14598  | 880    | 1.757  |
| 4          | 8.019     | 20577  | 1172   | 2.476  |
| 5          | 8.675     | 580    | 64     | 0.070  |
| 6          | 8.891     | 3332   | 311    | 0.401  |
| 7          | 9.275     | 302    | 36     | 0.036  |
| 8          | 9.561     | 4061   | 295    | 0.489  |
| 9          | 10.031    | 712    | 53     | 0.086  |
| 10         | 11.001    | 1749   | 116    | 0.211  |
| 11         | 11.880    | 2987   | 180    | 0.359  |
| 12         | 12.693    | 457563 | 26574  | 55.061 |
| 13         | 13.304    | 2370   | 195    | 0.285  |
| 14         | 13.999    | 1805   | 121    | 0.217  |
| 15         | 15.297    | 9089   | 475    | 1.094  |
| 16         | 19.002    | 45367  | 856    | 5.459  |
| 17         | 21.823    | 83179  | 3114   | 10.009 |
| Total      |           | 831017 | 45912  |        |

42 h

mV

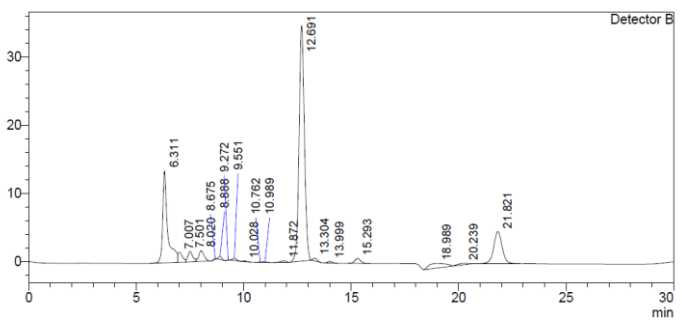

| Detector B |           |         |        |        |
|------------|-----------|---------|--------|--------|
| Peak#      | Ret. Time | Area    | Height | Conc.  |
| 1          | 6.311     | 217932  | 13510  | 19.847 |
| 2          | 7.007     | 22135   | 1472   | 2.016  |
| 3          | 7.501     | 24534   | 1537   | 2.234  |
| 4          | 8.020     | 27162   | 1577   | 2.474  |
| 5          | 8.675     | 710     | 74     | 0.065  |
| 6          | 8.888     | 5069    | 463    | 0.462  |
| 7          | 9.272     | 416     | 53     | 0.038  |
| 8          | 9.551     | 4005    | 317    | 0.365  |
| 9          | 10.028    | 1157    | 80     | 0.105  |
| 10         | 10.762    | 1155    | 98     | 0.105  |
| 11         | 10.989    | 1285    | 107    | 0.117  |
| 12         | 11.872    | 4117    | 227    | 0.375  |
| 13         | 12.691    | 596073  | 34526  | 54.284 |
| 14         | 13.304    | 5339    | 418    | 0.486  |
| 15         | 13.999    | 3770    | 243    | 0.343  |
| 16         | 15.293    | 14199   | 733    | 1.293  |
| 17         | 18.989    | 36050   | 661    | 3.283  |
| 18         | 20.239    | 7053    | 206    | 0.642  |
| 19         | 21.821    | 125894  | 4683   | 11.465 |
| Total      |           | 1098057 | 60985  |        |

mV

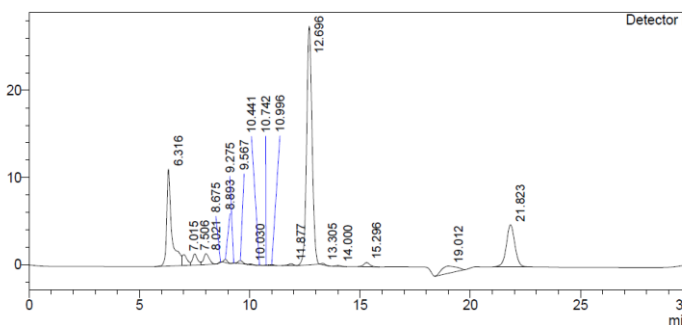

| Detector B |           |        |        |        |
|------------|-----------|--------|--------|--------|
| Peak#      | Ret. Time | Area   | Height | Conc.  |
| 1          | 6.316     | 177250 | 11086  | 19.560 |
| 2          | 7.015     | 19448  | 1250   | 2.146  |
| 3          | 7.506     | 20206  | 1279   | 2.230  |
| 4          | 8.021     | 22296  | 1251   | 2.460  |
| 5          | 8.675     | 531    | 59     | 0.059  |
| 6          | 8.893     | 3868   | 363    | 0.427  |
| 7          | 9.275     | 323    | 41     | 0.036  |
| 8          | 9.567     | 4354   | 325    | 0.480  |
| 9          | 10.030    | 930    | 69     | 0.103  |
| 10         | 10.441    | 233    | 29     | 0.026  |
| 11         | 10.742    | 718    | 62     | 0.079  |
| 12         | 10.996    | 1428   | 116    | 0.158  |
| 13         | 11.877    | 3346   | 193    | 0.369  |
| 14         | 12.696    | 471548 | 27327  | 52.037 |
| 15         | 13.305    | 1751   | 149    | 0.193  |
| 16         | 14.000    | 1770   | 118    | 0.195  |
| 17         | 15.296    | 9192   | 481    | 1.014  |
| 18         | 19.012    | 38479  | 815    | 4.246  |
| 19         | 21.823    | 128499 | 4818   | 14.180 |
| Total      |           | 906170 | 49831  |        |

48 h

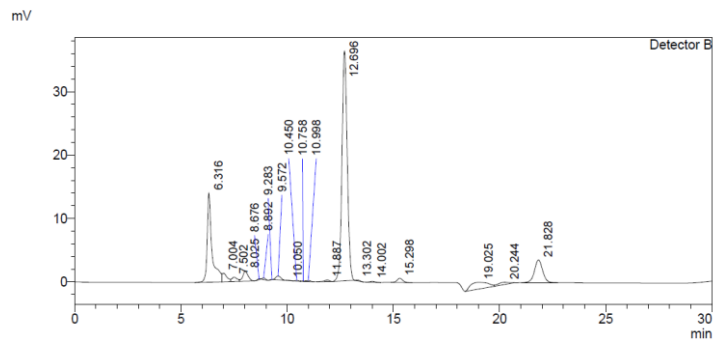

| Peak# | Ret. Time | Area    | Height | Conc.  |
|-------|-----------|---------|--------|--------|
| 1     | 6.316     | 221914  | 14054  | 19.865 |
| 2     | 7.004     | 21227   | 1336   | 1.900  |
| 3     | 7.502     | 12301   | 693    | 1.101  |
| 4     | 8.025     | 26828   | 1563   | 2.401  |
| 5     | 8.676     | 1063    | 120    | 0.095  |
| 6     | 8.892     | 2454    | 246    | 0.220  |
| 7     | 9.283     | 321     | 32     | 0.029  |
| 8     | 9.572     | 9385    | 583    | 0.840  |
| 9     | 10.050    | 542     | 50     | 0.048  |
| 10    | 10.450    | 1275    | 117    | 0.114  |
| 11    | 10.758    | 886     | 79     | 0.079  |
| 12    | 10.998    | 2057    | 159    | 0.184  |
| 13    | 11.887    | 4224    | 244    | 0.378  |
| 14    | 12.696    | 628864  | 36283  | 56.293 |
| 15    | 13.302    | 1539    | 135    | 0.138  |
| 16    | 14.002    | 2414    | 160    | 0.216  |
| 17    | 15.298    | 12805   | 666    | 1.146  |
| 18    | 19.025    | 57908   | 1033   | 5.184  |
| 19    | 20.244    | 13247   | 341    | 1.186  |
| 20    | 21.828    | 95878   | 3585   | 8.583  |
| Total |           | 1117131 | 61479  |        |

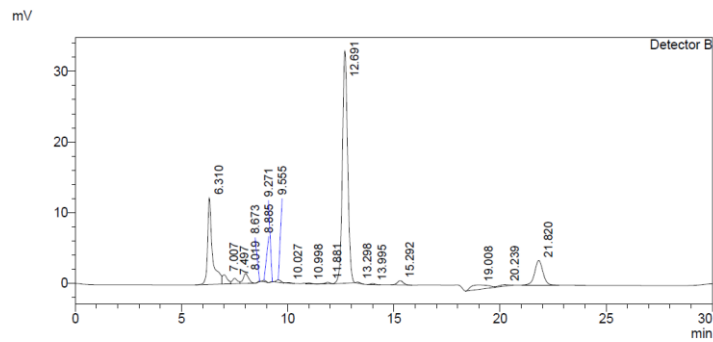

| Peak# | Ret. Time | Area   | Height | Conc.  |
|-------|-----------|--------|--------|--------|
| 1     | 6.310     | 196652 | 12255  | 19.864 |
| 2     | 7.007     | 20865  | 1303   | 2.108  |
| 3     | 7.497     | 13148  | 775    | 1.328  |
| 4     | 8.019     | 24462  | 1398   | 2.471  |
| 5     | 8.673     | 860    | 96     | 0.087  |
| 6     | 8.885     | 2262   | 227    | 0.228  |
| 7     | 9.271     | 426    | 49     | 0.043  |
| 8     | 9.555     | 5150   | 357    | 0.520  |
| 9     | 10.027    | 943    | 68     | 0.095  |
| 10    | 10.998    | 2000   | 145    | 0.202  |
| 11    | 11.881    | 3545   | 216    | 0.358  |
| 12    | 12.691    | 568963 | 32853  | 57.471 |
| 13    | 13.298    | 1520   | 133    | 0.154  |
| 14    | 13.995    | 2203   | 146    | 0.223  |
| 15    | 15.292    | 11673  | 604    | 1.179  |
| 16    | 19.008    | 35262  | 635    | 3.562  |
| 17    | 20.239    | 7182   | 211    | 0.725  |
| 18    | 21.820    | 92881  | 3474   | 9.382  |
| Total |           | 989998 | 54946  |        |

B: The curves of fermentation on corncob substrate by NH<sub>3</sub> pretreatment for 1 day followed by H<sub>2</sub>O<sub>2</sub> treatment for 7 day at pH6.0 adjusted by automatic feeding of NaOH solution.

0 h

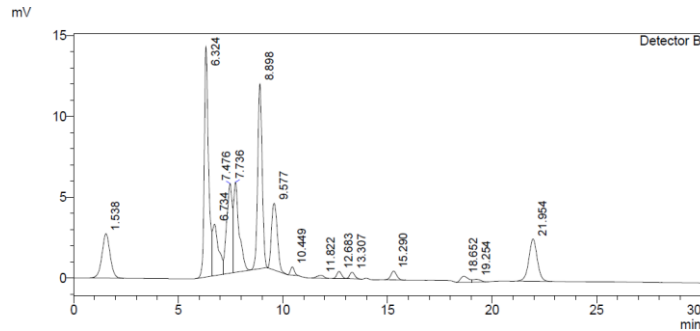

| Peak# | Ret. Time | Area   | Height | Conc.  |
|-------|-----------|--------|--------|--------|
| 1     | 6.335     | 133956 | 9965   | 18.850 |
| 2     | 6.750     | 39230  | 2002   | 5.521  |
| 3     | 7.499     | 52554  | 3205   | 7.395  |
| 4     | 7.751     | 62891  | 3368   | 8.850  |
| 5     | 8.911     | 103145 | 6979   | 14.515 |
| 6     | 9.584     | 54432  | 2911   | 7.660  |
| 7     | 10.464    | 4526   | 362    | 0.637  |
| 8     | 11.833    | 2898   | 128    | 0.408  |
| 9     | 12.696    | 4907   | 311    | 0.691  |
| 10    | 13.317    | 4376   | 268    | 0.616  |
| 11    | 15.302    | 6499   | 335    | 0.915  |
| 12    | 19.322    | 37992  | 697    | 5.346  |
| 13    | 21.866    | 203217 | 5011   | 28.597 |
| Total |           | 710625 | 35542  |        |

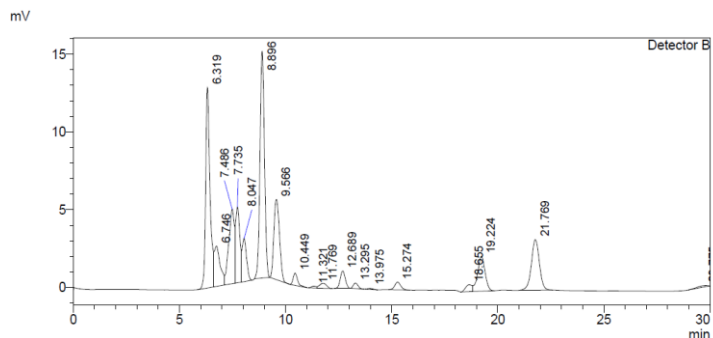

| Peak# | Ret. Time | Area   | Height | Conc.  |
|-------|-----------|--------|--------|--------|
| 1     | 6.319     | 184772 | 12888  | 19.544 |
| 2     | 6.746     | 49162  | 2594   | 5.200  |
| 3     | 7.486     | 86523  | 4794   | 9.152  |
| 4     | 7.735     | 70722  | 4870   | 7.480  |
| 5     | 8.047     | 39592  | 2778   | 4.188  |
| 6     | 8.896     | 215032 | 14564  | 22.744 |
| 7     | 9.566     | 93039  | 5160   | 9.841  |
| 8     | 10.449    | 11412  | 782    | 1.207  |
| 9     | 11.321    | 1780   | 121    | 0.188  |
| 10    | 11.769    | 7256   | 319    | 0.768  |
| 11    | 12.689    | 18249  | 1107   | 1.930  |
| 12    | 13.295    | 5653   | 355    | 0.598  |
| 13    | 13.975    | 1292   | 84     | 0.137  |
| 14    | 15.274    | 9929   | 499    | 1.050  |
| 15    | 18.655    | 9557   | 445    | 1.011  |
| 16    | 19.224    | 54312  | 2240   | 5.745  |
| 17    | 21.769    | 83999  | 3247   | 8.885  |
| 18    | 29.775    | 3145   | 78     | 0.333  |
| Total |           | 945426 | 56925  |        |

12 h

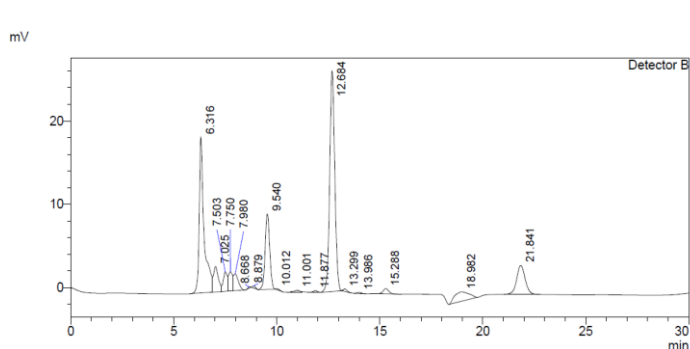

| Peak# | Ret. Time | Area    | Height | Conc.  |
|-------|-----------|---------|--------|--------|
| 1     | 6.316     | 308408  | 18722  | 24.962 |
| 2     | 7.025     | 51521   | 3066   | 4.170  |
| 3     | 7.503     | 30812   | 2319   | 2.494  |
| 4     | 7.750     | 32924   | 2308   | 2.665  |
| 5     | 7.980     | 32574   | 2026   | 2.636  |
| 6     | 8.668     | 1224    | 139    | 0.099  |
| 7     | 8.879     | 2703    | 271    | 0.219  |
| 8     | 9.540     | 137332  | 9056   | 11.115 |
| 9     | 10.012    | 1564    | 129    | 0.127  |
| 10    | 11.001    | 5305    | 257    | 0.429  |
| 11    | 11.877    | 2868    | 195    | 0.232  |
| 12    | 12.684    | 456859  | 26472  | 36.978 |
| 13    | 13.299    | 3612    | 286    | 0.292  |
| 14    | 13.986    | 1688    | 114    | 0.137  |
| 15    | 15.288    | 11800   | 616    | 0.955  |
| 16    | 18.982    | 55499   | 1126   | 4.492  |
| 17    | 21.841    | 98812   | 3479   | 7.998  |
| Total |           | 1235504 | 70581  |        |

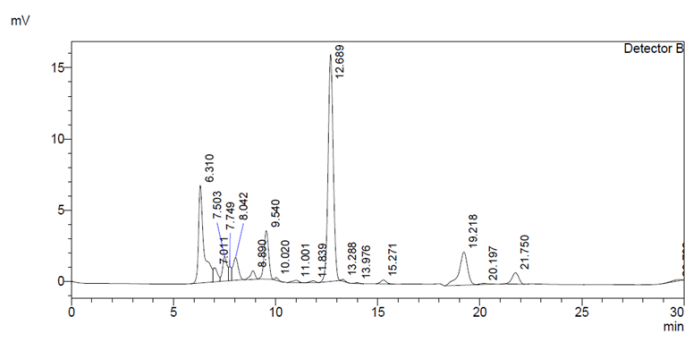

| Peak# | Ret. Time | Area   | Height | Conc.  |
|-------|-----------|--------|--------|--------|
| 1     | 6.310     | 126512 | 6845   | 19.406 |
| 2     | 7.011     | 15321  | 992    | 2.350  |
| 3     | 7.503     | 27228  | 1728   | 4.177  |
| 4     | 7.749     | 8981   | 969    | 1.378  |
| 5     | 8.042     | 28112  | 1594   | 4.312  |
| 6     | 8.890     | 9519   | 599    | 1.460  |
| 7     | 9.540     | 51645  | 3402   | 7.922  |
| 8     | 10.020    | 2243   | 184    | 0.344  |
| 9     | 11.001    | 3568   | 168    | 0.547  |
| 10    | 11.839    | 2508   | 126    | 0.385  |
| 11    | 12.689    | 278962 | 15925  | 42.791 |
| 12    | 13.288    | 1395   | 119    | 0.214  |
| 13    | 13.976    | 871    | 56     | 0.134  |
| 14    | 15.271    | 5237   | 274    | 0.803  |
| 15    | 19.218    | 66423  | 2324   | 10.189 |
| 16    | 20.197    | 1901   | 73     | 0.292  |
| 17    | 21.750    | 18372  | 795    | 2.818  |
| 18    | 29.782    | 3115   | 76     | 0.478  |
| Total |           | 651913 | 36249  |        |

18 h

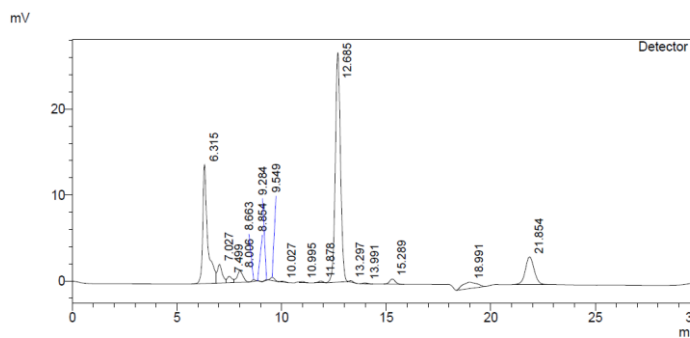

| Peak# | Ret. Time | Area   | Height | Conc.  |
|-------|-----------|--------|--------|--------|
| 1     | 6.315     | 224211 | 13830  | 24.422 |
| 2     | 7.027     | 35735  | 2168   | 3.893  |
| 3     | 7.499     | 12879  | 753    | 1.403  |
| 4     | 8.006     | 26101  | 1341   | 2.843  |
| 5     | 8.663     | 2104   | 205    | 0.229  |
| 6     | 8.854     | 115    | 17     | 0.013  |
| 7     | 9.284     | 862    | 78     | 0.094  |
| 8     | 9.549     | 4750   | 355    | 0.517  |
| 9     | 10.027    | 1244   | 86     | 0.135  |
| 10    | 10.995    | 1928   | 148    | 0.210  |
| 11    | 11.878    | 2997   | 205    | 0.326  |
| 12    | 12.685    | 461324 | 26691  | 50.250 |
| 13    | 13.297    | 1981   | 166    | 0.216  |
| 14    | 13.991    | 1738   | 117    | 0.189  |
| 15    | 15.289    | 11574  | 603    | 1.261  |
| 16    | 18.991    | 34718  | 726    | 3.782  |
| 17    | 21.854    | 93794  | 3216   | 10.217 |
| Total |           | 918055 | 50704  |        |

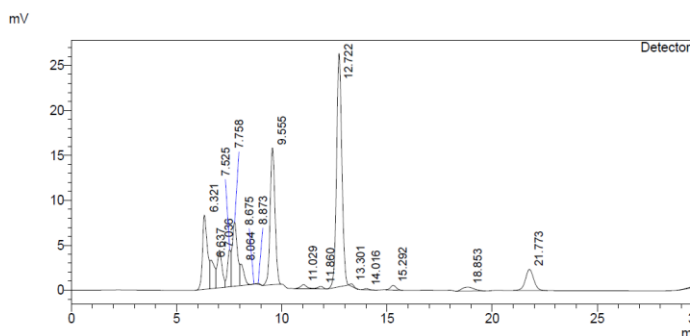

| Peak# | Ret. Time | Area    | Height | Conc.  |
|-------|-----------|---------|--------|--------|
| 1     | 6.313     | 227888  | 13164  | 19.753 |
| 2     | 7.015     | 31330   | 1922   | 2.716  |
| 3     | 7.512     | 56751   | 3979   | 4.919  |
| 4     | 7.737     | 58009   | 3930   | 5.028  |
| 5     | 8.042     | 47333   | 3062   | 4.103  |
| 6     | 8.729     | 654     | 14     | 0.057  |
| 7     | 8.882     | 4173    | 365    | 0.362  |
| 8     | 9.540     | 176368  | 11473  | 15.288 |
| 9     | 10.020    | 936     | 86     | 0.081  |
| 10    | 10.450    | 7142    | 582    | 0.619  |
| 11    | 10.992    | 514     | 50     | 0.045  |
| 12    | 11.795    | 5884    | 275    | 0.510  |
| 13    | 12.690    | 378456  | 21656  | 32.804 |
| 14    | 13.289    | 3059    | 230    | 0.265  |
| 15    | 13.979    | 1038    | 69     | 0.090  |
| 16    | 15.274    | 7394    | 380    | 0.641  |
| 17    | 18.019    | 2056    | 123    | 0.178  |
| 18    | 19.217    | 69527   | 2315   | 6.027  |
| 19    | 21.769    | 72334   | 2803   | 6.270  |
| 20    | 29.805    | 2830    | 68     | 0.245  |
| Total |           | 1153675 | 66546  |        |

24 h

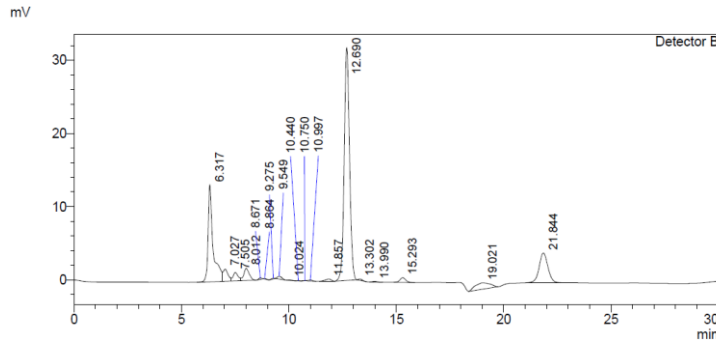

| Peak# | Ret. Time | Area    | Height | Conc.  |
|-------|-----------|---------|--------|--------|
| 1     | 6.317     | 213532  | 13244  | 20.739 |
| 2     | 7.027     | 27147   | 1656   | 2.637  |
| 3     | 7.505     | 19083   | 1159   | 1.853  |
| 4     | 8.012     | 29011   | 1647   | 2.818  |
| 5     | 8.671     | 1667    | 174    | 0.162  |
| 6     | 8.864     | 509     | 53     | 0.049  |
| 7     | 9.275     | 960     | 92     | 0.093  |
| 8     | 9.549     | 5385    | 387    | 0.523  |
| 9     | 10.024    | 765     | 59     | 0.074  |
| 10    | 10.440    | 485     | 54     | 0.047  |
| 11    | 10.750    | 801     | 72     | 0.078  |
| 12    | 10.997    | 2024    | 159    | 0.197  |
| 13    | 11.857    | 5675    | 294    | 0.551  |
| 14    | 12.690    | 549100  | 31756  | 53.330 |
| 15    | 13.302    | 2339    | 193    | 0.227  |
| 16    | 13.990    | 1641    | 112    | 0.159  |
| 17    | 15.293    | 12296   | 641    | 1.194  |
| 18    | 19.021    | 41813   | 848    | 4.061  |
| 19    | 21.844    | 115401  | 4070   | 11.208 |
| Total |           | 1029634 | 56672  |        |

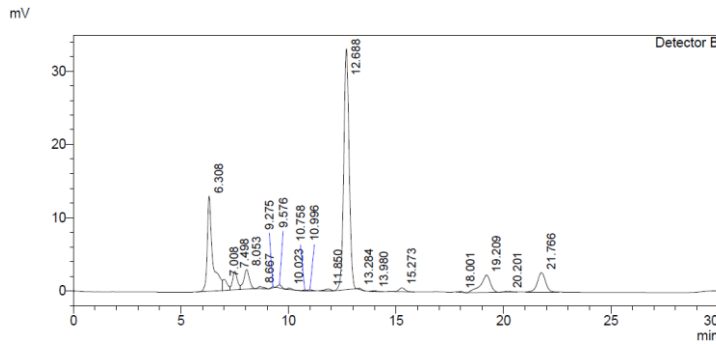

| Peak# | Ret. Time | Area    | Height | Conc.  |
|-------|-----------|---------|--------|--------|
| 1     | 6.308     | 224027  | 12962  | 20.529 |
| 2     | 7.008     | 22624   | 1497   | 2.073  |
| 3     | 7.498     | 39749   | 2541   | 3.642  |
| 4     | 8.053     | 47111   | 2658   | 4.317  |
| 5     | 8.667     | 5450    | 279    | 0.499  |
| 6     | 9.275     | 1178    | 118    | 0.108  |
| 7     | 9.576     | 5201    | 417    | 0.477  |
| 8     | 10.023    | 2957    | 204    | 0.271  |
| 9     | 10.758    | 1212    | 97     | 0.111  |
| 10    | 10.996    | 1707    | 134    | 0.156  |
| 11    | 11.850    | 4491    | 235    | 0.412  |
| 12    | 12.688    | 576276  | 32856  | 52.807 |
| 13    | 13.284    | 2092    | 170    | 0.192  |
| 14    | 13.980    | 1676    | 112    | 0.154  |
| 15    | 15.273    | 10420   | 536    | 0.955  |
| 16    | 18.001    | 1225    | 79     | 0.112  |
| 17    | 19.209    | 74188   | 2354   | 6.798  |
| 18    | 20.201    | 2013    | 85     | 0.184  |
| 19    | 21.766    | 67688   | 2635   | 6.203  |
| Total |           | 1091287 | 59969  |        |

36 h

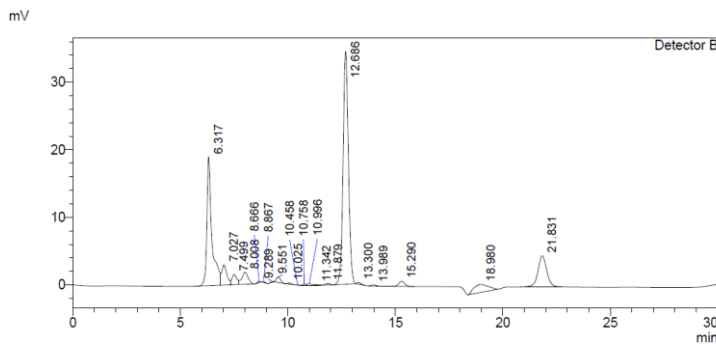

| Peak# | Ret. Time | Area    | Height | Conc.  |
|-------|-----------|---------|--------|--------|
| 1     | 6.317     | 307762  | 19062  | 24.813 |
| 2     | 7.027     | 49390   | 2977   | 3.982  |
| 3     | 7.499     | 24977   | 1526   | 2.014  |
| 4     | 8.008     | 35584   | 1790   | 2.869  |
| 5     | 8.666     | 2133    | 229    | 0.172  |
| 6     | 8.867     | 919     | 94     | 0.074  |
| 7     | 9.289     | 1000    | 82     | 0.081  |
| 8     | 9.551     | 10926   | 786    | 0.881  |
| 9     | 10.025    | 2158    | 159    | 0.174  |
| 10    | 10.458    | 53      | 10     | 0.004  |
| 11    | 10.758    | 1149    | 109    | 0.093  |
| 12    | 10.996    | 3120    | 211    | 0.252  |
| 13    | 11.342    | 748     | 56     | 0.060  |
| 14    | 11.879    | 3948    | 259    | 0.318  |
| 15    | 12.686    | 594491  | 34432  | 47.931 |
| 16    | 13.300    | 2945    | 243    | 0.237  |
| 17    | 13.989    | 2302    | 154    | 0.186  |
| 18    | 15.290    | 14649   | 762    | 1.181  |
| 19    | 18.980    | 54739   | 1187   | 4.413  |
| 20    | 21.831    | 127319  | 4594   | 10.265 |
| Total |           | 1240312 | 68722  |        |

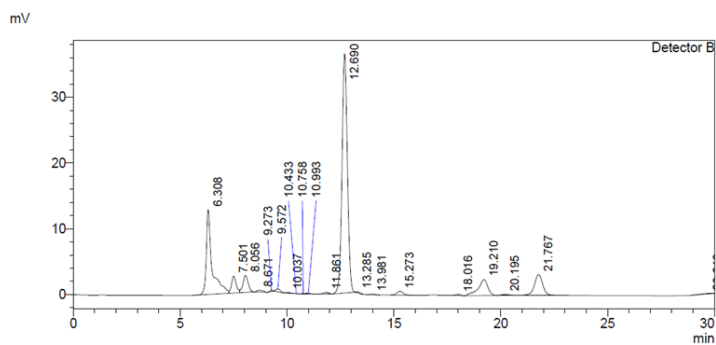

| Peak# | Ret. Time | Area    | Height | Conc.  |
|-------|-----------|---------|--------|--------|
| 1     | 6.308     | 239911  | 12887  | 20.672 |
| 2     | 7.501     | 38942   | 2571   | 3.355  |
| 3     | 8.056     | 43497   | 2576   | 3.748  |
| 4     | 8.671     | 5505    | 291    | 0.474  |
| 5     | 9.273     | 1098    | 107    | 0.095  |
| 6     | 9.572     | 5958    | 443    | 0.513  |
| 7     | 10.037    | 1147    | 86     | 0.099  |
| 8     | 10.433    | 173     | 25     | 0.015  |
| 9     | 10.758    | 1224    | 97     | 0.105  |
| 10    | 10.993    | 1866    | 144    | 0.161  |
| 11    | 11.861    | 4776    | 247    | 0.412  |
| 12    | 12.690    | 637899  | 36338  | 54.966 |
| 13    | 13.285    | 2059    | 169    | 0.177  |
| 14    | 13.981    | 1713    | 113    | 0.148  |
| 15    | 15.273    | 11408   | 584    | 0.983  |
| 16    | 18.016    | 1934    | 114    | 0.167  |
| 17    | 19.210    | 75079   | 2424   | 6.469  |
| 18    | 20.195    | 2619    | 108    | 0.226  |
| 19    | 21.767    | 80991   | 3123   | 6.979  |
| 20    | 29.816    | 2742    | 63     | 0.236  |
| Total |           | 1160541 | 62509  |        |

42 h

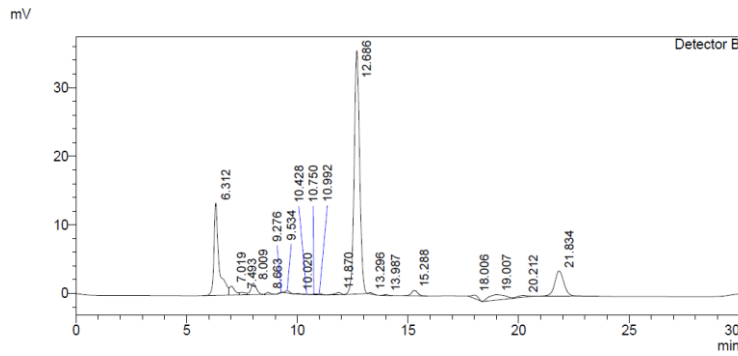

| Peak# | Ret. Time | Area    | Height | Conc.  |
|-------|-----------|---------|--------|--------|
| 1     | 6.312     | 213014  | 13464  | 19.631 |
| 2     | 7.019     | 22190   | 1287   | 2.045  |
| 3     | 7.493     | 6592    | 359    | 0.608  |
| 4     | 8.009     | 28963   | 1674   | 2.669  |
| 5     | 8.663     | 3779    | 292    | 0.348  |
| 6     | 9.276     | 994     | 78     | 0.092  |
| 7     | 9.534     | 4339    | 333    | 0.400  |
| 8     | 10.020    | 1111    | 81     | 0.102  |
| 9     | 10.428    | 291     | 34     | 0.027  |
| 10    | 10.750    | 946     | 91     | 0.087  |
| 11    | 10.992    | 2671    | 194    | 0.246  |
| 12    | 11.870    | 5557    | 303    | 0.512  |
| 13    | 12.686    | 614157  | 35436  | 56.600 |
| 14    | 13.296    | 1883    | 161    | 0.173  |
| 15    | 13.987    | 1901    | 128    | 0.175  |
| 16    | 15.288    | 15571   | 803    | 1.435  |
| 17    | 18.006    | 9900    | 483    | 0.912  |
| 18    | 19.007    | 39049   | 771    | 3.599  |
| 19    | 20.212    | 8130    | 253    | 0.749  |
| 20    | 21.834    | 104046  | 3669   | 9.589  |
| Total |           | 1085083 | 59892  |        |

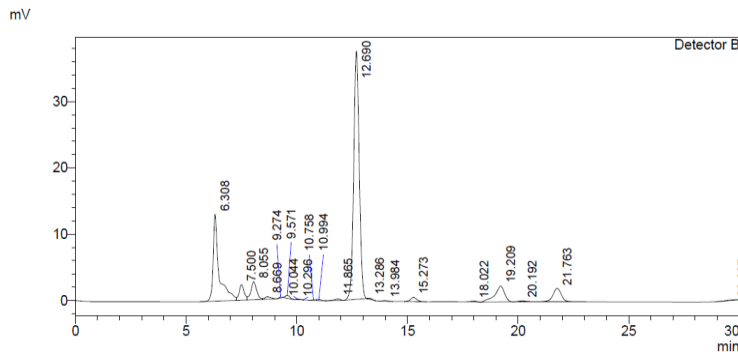

| Peak# | Ret. Time | Area    | Height | Conc.  |
|-------|-----------|---------|--------|--------|
| 1     | 6.308     | 243734  | 13055  | 21.088 |
| 2     | 7.500     | 36953   | 2346   | 3.197  |
| 3     | 8.055     | 48399   | 2702   | 4.187  |
| 4     | 8.669     | 7360    | 379    | 0.637  |
| 5     | 9.274     | 1167    | 112    | 0.101  |
| 6     | 9.571     | 5806    | 433    | 0.502  |
| 7     | 10.044    | 1189    | 86     | 0.103  |
| 8     | 10.296    | 1       | 1      | 0.000  |
| 9     | 10.758    | 1299    | 103    | 0.112  |
| 10    | 10.994    | 2022    | 154    | 0.175  |
| 11    | 11.865    | 4773    | 249    | 0.413  |
| 12    | 12.690    | 656323  | 37399  | 56.785 |
| 13    | 13.286    | 2174    | 177    | 0.188  |
| 14    | 13.984    | 1698    | 113    | 0.147  |
| 15    | 15.273    | 12010   | 616    | 1.039  |
| 16    | 18.022    | 2131    | 127    | 0.184  |
| 17    | 19.209    | 73205   | 2368   | 6.334  |
| 18    | 20.192    | 2889    | 119    | 0.250  |
| 19    | 21.763    | 50112   | 1986   | 4.336  |
| 20    | 29.807    | 2558    | 62     | 0.221  |
| Total |           | 1155804 | 62587  |        |

48 h

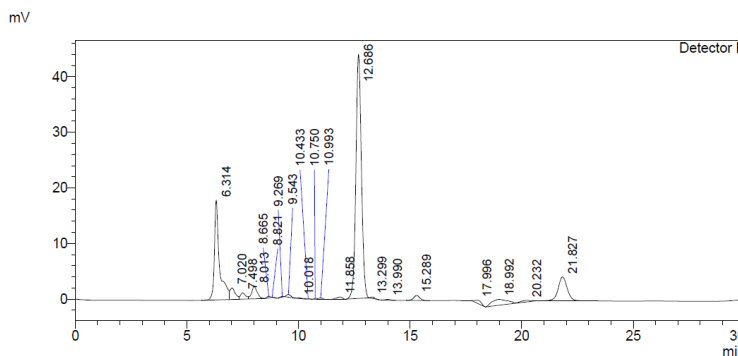

| Peak# | Ret. Time | Area    | Height | Conc.  |
|-------|-----------|---------|--------|--------|
| 1     | 6.314     | 284519  | 17938  | 20.763 |
| 2     | 7.020     | 33861   | 2074   | 2.471  |
| 3     | 7.498     | 18836   | 1129   | 1.375  |
| 4     | 8.013     | 38101   | 2192   | 2.780  |
| 5     | 8.665     | 2581    | 264    | 0.188  |
| 6     | 8.821     | 385     | 21     | 0.028  |
| 7     | 9.269     | 1367    | 127    | 0.100  |
| 8     | 9.543     | 6713    | 491    | 0.490  |
| 9     | 10.018    | 1108    | 84     | 0.081  |
| 10    | 10.433    | 561     | 64     | 0.041  |
| 11    | 10.750    | 1100    | 108    | 0.080  |
| 12    | 10.993    | 3055    | 229    | 0.223  |
| 13    | 11.858    | 7596    | 395    | 0.554  |
| 14    | 12.666    | 757815  | 43834  | 55.302 |
| 15    | 13.299    | 3112    | 255    | 0.227  |
| 16    | 13.990    | 2241    | 152    | 0.164  |
| 17    | 15.289    | 17558   | 907    | 1.281  |
| 18    | 17.996    | 11574   | 527    | 0.845  |
| 19    | 18.992    | 51074   | 1057   | 3.727  |
| 20    | 20.232    | 9377    | 278    | 0.684  |
| 21    | 21.827    | 117776  | 4282   | 8.595  |
| Total |           | 1370310 | 76406  |        |

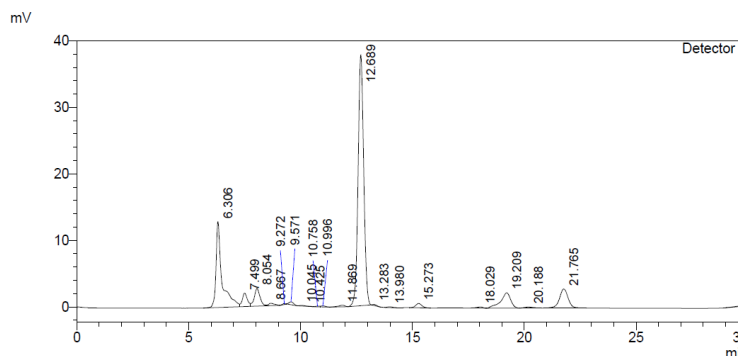

| Peak# | Ret. Time | Area    | Height | Conc.  |
|-------|-----------|---------|--------|--------|
| 1     | 6.306     | 239677  | 12907  | 20.430 |
| 2     | 7.499     | 32186   | 2022   | 2.743  |
| 3     | 8.054     | 46696   | 2642   | 3.980  |
| 4     | 8.667     | 6951    | 355    | 0.592  |
| 5     | 9.272     | 1315    | 124    | 0.112  |
| 6     | 9.571     | 5742    | 424    | 0.489  |
| 7     | 10.045    | 1497    | 92     | 0.128  |
| 8     | 10.425    | 278     | 35     | 0.024  |
| 9     | 10.758    | 1265    | 104    | 0.108  |
| 10    | 10.996    | 2112    | 157    | 0.180  |
| 11    | 11.869    | 4753    | 248    | 0.405  |
| 12    | 12.689    | 661557  | 37690  | 56.390 |
| 13    | 13.283    | 1945    | 158    | 0.166  |
| 14    | 13.980    | 1634    | 109    | 0.139  |
| 15    | 15.273    | 12471   | 639    | 1.063  |
| 16    | 18.029    | 2589    | 150    | 0.221  |
| 17    | 19.209    | 71373   | 2309   | 6.084  |
| 18    | 20.188    | 3218    | 131    | 0.274  |
| 19    | 21.765    | 73237   | 2839   | 6.243  |
| 20    | 29.795    | 2680    | 67     | 0.228  |
| Total |           | 1173175 | 63203  |        |

C: The curves of fermentation on corncob substrate by NH<sub>3</sub> pretreatment for 1

day followed by H<sub>2</sub>O<sub>2</sub> treatment for 7 day at pH6.0 adjusted by CaCO<sub>3</sub>

0 h

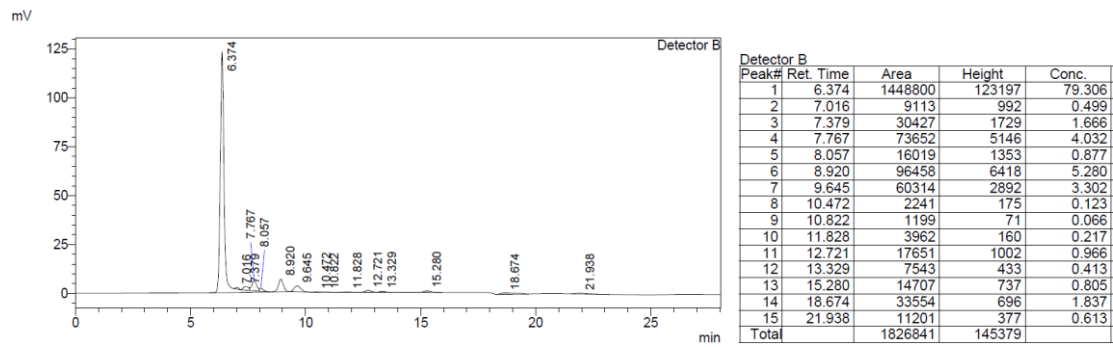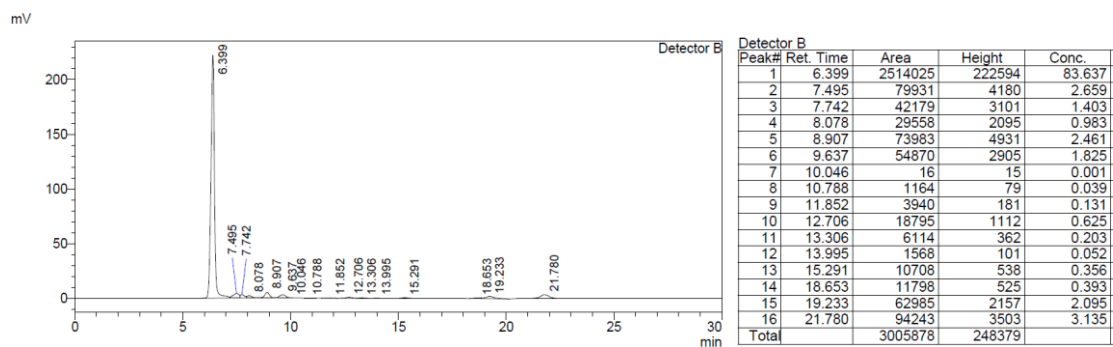

12 h

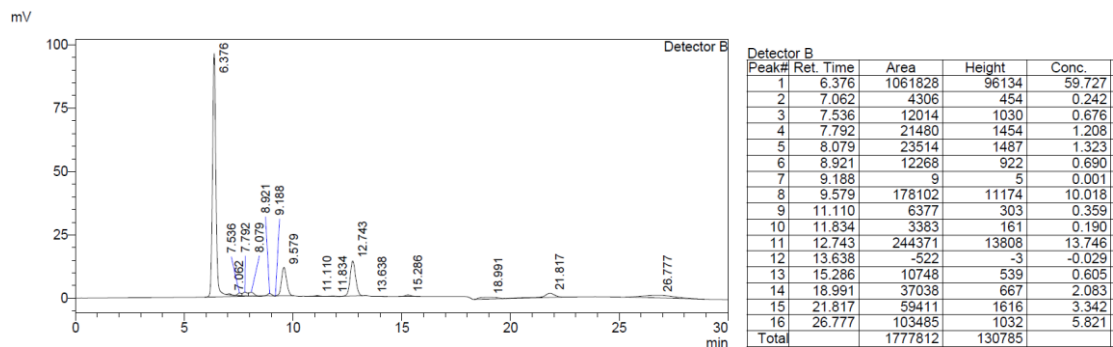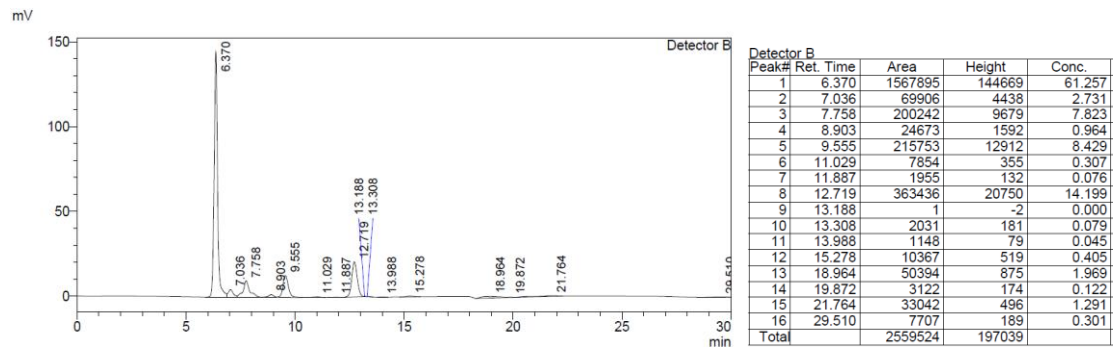

18 h

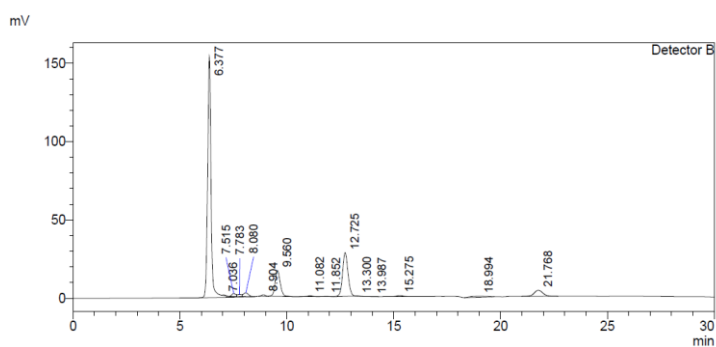

| Peak# | Ret. Time | Area    | Height | Conc.  |
|-------|-----------|---------|--------|--------|
| 1     | 6.377     | 1711528 | 153967 | 62.204 |
| 2     | 7.036     | 3772    | 423    | 0.137  |
| 3     | 7.515     | 23411   | 1829   | 0.851  |
| 4     | 7.783     | 18120   | 1354   | 0.659  |
| 5     | 8.080     | 39567   | 2424   | 1.438  |
| 6     | 8.904     | 13030   | 1030   | 0.474  |
| 7     | 9.560     | 271101  | 16495  | 9.853  |
| 8     | 11.082    | 12821   | 663    | 0.466  |
| 9     | 11.852    | 3790    | 191    | 0.138  |
| 10    | 12.725    | 494758  | 27909  | 17.982 |
| 11    | 13.300    | 1468    | 121    | 0.053  |
| 12    | 13.987    | 1520    | 101    | 0.055  |
| 13    | 15.275    | 14928   | 747    | 0.543  |
| 14    | 18.994    | 33082   | 650    | 1.202  |
| 15    | 21.768    | 108584  | 3895   | 3.946  |
| Total |           | 2751480 | 211798 |        |

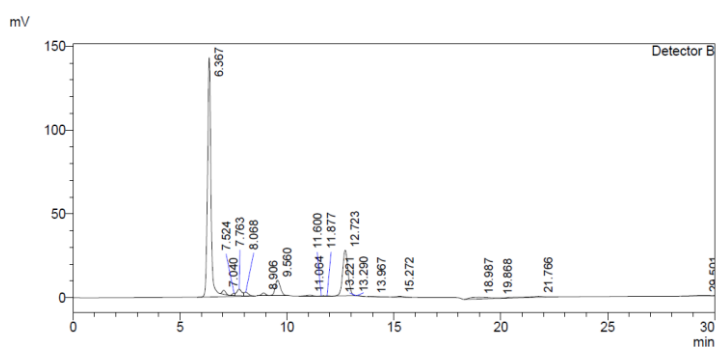

| Peak# | Ret. Time | Area    | Height | Conc.  |
|-------|-----------|---------|--------|--------|
| 1     | 6.367     | 1629070 | 142911 | 63.666 |
| 2     | 7.040     | 27436   | 2428   | 1.072  |
| 3     | 7.524     | 12728   | 1408   | 0.497  |
| 4     | 7.763     | 60896   | 3914   | 2.380  |
| 5     | 8.068     | 31056   | 2185   | 1.214  |
| 6     | 8.906     | 23169   | 1654   | 0.905  |
| 7     | 9.560     | 151665  | 9146   | 5.927  |
| 8     | 11.064    | 10615   | 522    | 0.415  |
| 9     | 11.600    | 1137    | 83     | 0.044  |
| 10    | 11.877    | 2792    | 179    | 0.109  |
| 11    | 12.723    | 481526  | 27202  | 18.818 |
| 12    | 13.221    | 0       | -1     | 0.000  |
| 13    | 13.290    | 1783    | 146    | 0.070  |
| 14    | 13.967    | 2234    | 146    | 0.087  |
| 15    | 15.272    | 12301   | 635    | 0.481  |
| 16    | 18.987    | 53327   | 940    | 2.084  |
| 17    | 19.868    | 5759    | 267    | 0.225  |
| 18    | 21.766    | 38627   | 557    | 1.510  |
| 19    | 29.501    | 12669   | 270    | 0.495  |
| Total |           | 2558790 | 194590 |        |

24 h

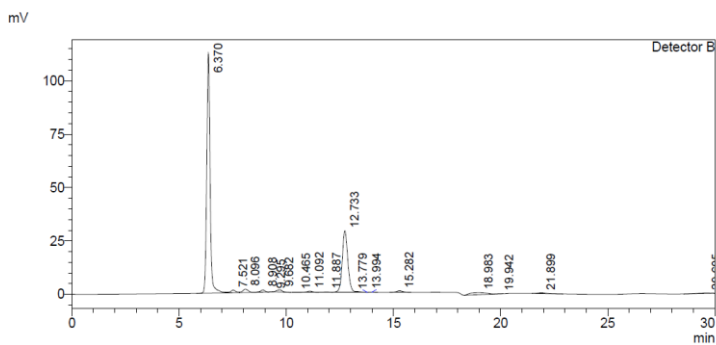

| Peak# | Ret. Time | Area    | Height | Conc.  |
|-------|-----------|---------|--------|--------|
| 1     | 6.370     | 1220143 | 112269 | 63.302 |
| 2     | 7.521     | 22678   | 1208   | 1.177  |
| 3     | 8.096     | 27663   | 1597   | 1.435  |
| 4     | 8.908     | 14924   | 980    | 0.774  |
| 5     | 9.295     | 199     | 25     | 0.010  |
| 6     | 9.562     | 17586   | 968    | 0.912  |
| 7     | 10.465    | 463     | 48     | 0.024  |
| 8     | 11.092    | 10095   | 579    | 0.524  |
| 9     | 11.887    | 3010    | 150    | 0.156  |
| 10    | 12.733    | 524739  | 28814  | 27.224 |
| 11    | 13.779    | 0       | -0     | 0.000  |
| 12    | 13.994    | 1053    | 71     | 0.055  |
| 13    | 15.282    | 13713   | 690    | 0.711  |
| 14    | 18.983    | 51334   | 938    | 2.663  |
| 15    | 19.942    | 1059    | 53     | 0.055  |
| 16    | 21.899    | 10138   | 339    | 0.526  |
| 17    | 29.605    | 8688    | 178    | 0.451  |
| Total |           | 1927486 | 148907 |        |

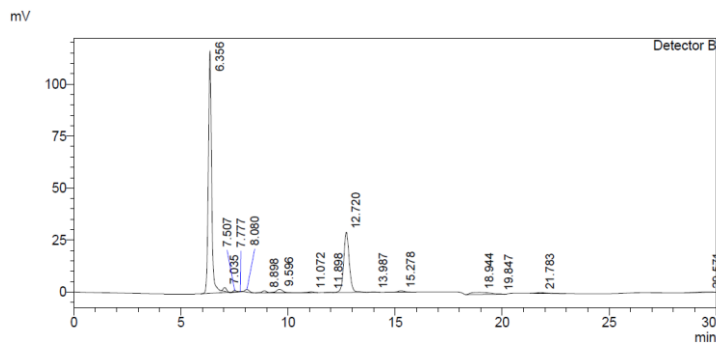

| Peak# | Ret. Time | Area    | Height | Conc.  |
|-------|-----------|---------|--------|--------|
| 1     | 6.356     | 1243215 | 116190 | 62.845 |
| 2     | 7.035     | 20575   | 1884   | 1.040  |
| 3     | 7.507     | 8788    | 828    | 0.444  |
| 4     | 7.777     | 1440    | 138    | 0.073  |
| 5     | 8.080     | 17673   | 1284   | 0.893  |
| 6     | 8.898     | 16698   | 995    | 0.844  |
| 7     | 9.596     | 38551   | 1663   | 1.949  |
| 8     | 11.072    | 8940    | 450    | 0.452  |
| 9     | 11.898    | 2496    | 162    | 0.126  |
| 10    | 12.720    | 523589  | 28962  | 26.468 |
| 11    | 13.987    | 2786    | 168    | 0.141  |
| 12    | 15.278    | 12300   | 619    | 0.622  |
| 13    | 18.944    | 55252   | 988    | 2.793  |
| 14    | 19.847    | 2636    | 174    | 0.133  |
| 15    | 21.783    | 12486   | 378    | 0.631  |
| 16    | 29.571    | 10785   | 229    | 0.545  |
| Total |           | 1978210 | 155112 |        |

36 h

mV

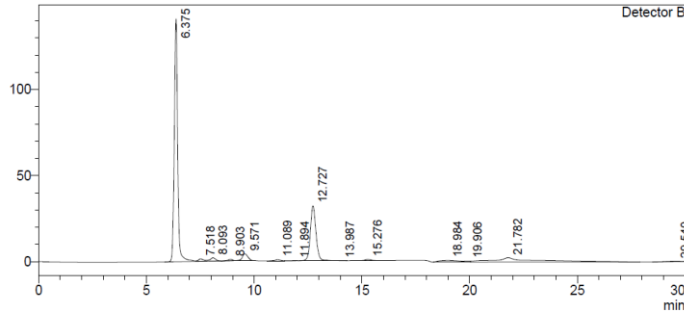

| Peak# | Ret. Time | Area    | Height | Conc.  |
|-------|-----------|---------|--------|--------|
| 1     | 6.375     | 1542169 | 141305 | 56.204 |
| 2     | 7.518     | 17238   | 1250   | 0.628  |
| 3     | 8.093     | 34251   | 1848   | 1.248  |
| 4     | 8.903     | 13488   | 882    | 0.492  |
| 5     | 9.571     | 70463   | 3940   | 2.568  |
| 6     | 11.089    | 13715   | 713    | 0.500  |
| 7     | 11.894    | 4441    | 186    | 0.162  |
| 8     | 12.727    | 584367  | 31860  | 21.297 |
| 9     | 13.987    | 1384    | 92     | 0.050  |
| 10    | 15.276    | 13993   | 702    | 0.510  |
| 11    | 18.984    | 60643   | 1011   | 2.210  |
| 12    | 19.906    | 12859   | 608    | 0.469  |
| 13    | 21.782    | 364135  | 2512   | 13.271 |
| 14    | 29.540    | 10718   | 229    | 0.391  |
| Total |           | 2743863 | 187139 |        |

mV

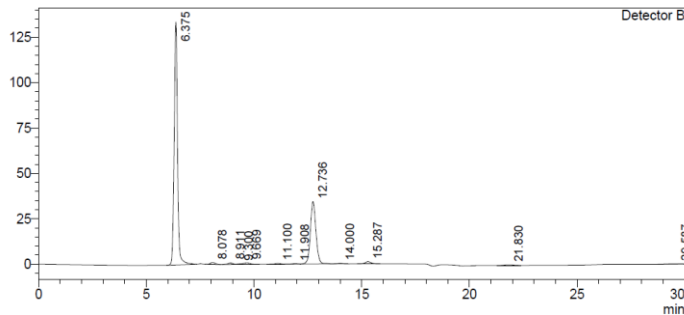

| Peak# | Ret. Time | Area    | Height | Conc.  |
|-------|-----------|---------|--------|--------|
| 1     | 6.375     | 1445362 | 133959 | 66.356 |
| 2     | 8.078     | 16656   | 1114   | 0.765  |
| 3     | 8.911     | 13962   | 862    | 0.641  |
| 4     | 9.300     | 1363    | 150    | 0.063  |
| 5     | 9.669     | 15923   | 784    | 0.731  |
| 6     | 11.100    | 8936    | 438    | 0.410  |
| 7     | 11.908    | 5810    | 273    | 0.267  |
| 8     | 12.736    | 623848  | 34417  | 28.641 |
| 9     | 14.000    | 5263    | 328    | 0.242  |
| 10    | 15.287    | 24717   | 1236   | 1.135  |
| 11    | 21.830    | 9364    | 334    | 0.430  |
| 12    | 29.587    | 6990    | 148    | 0.321  |
| Total |           | 2178192 | 174044 |        |

42 h

mV

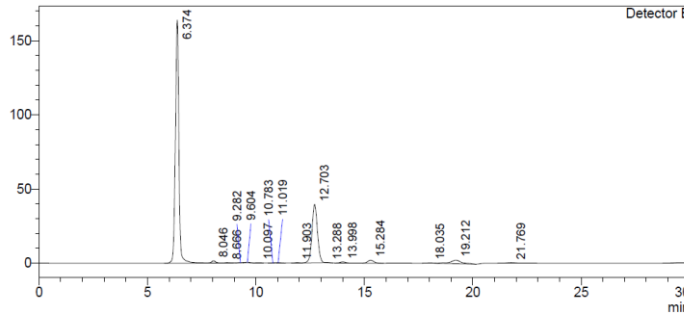

| Peak# | Ret. Time | Area    | Height | Conc.  |
|-------|-----------|---------|--------|--------|
| 1     | 6.374     | 1839578 | 164172 | 67.340 |
| 2     | 8.046     | 17414   | 1445   | 0.637  |
| 3     | 8.666     | 3197    | 253    | 0.117  |
| 4     | 9.282     | 2145    | 169    | 0.079  |
| 5     | 9.604     | 5015    | 391    | 0.184  |
| 6     | 10.097    | 1968    | 110    | 0.072  |
| 7     | 10.783    | 1147    | 108    | 0.042  |
| 8     | 11.019    | 3781    | 252    | 0.138  |
| 9     | 11.903    | 2984    | 222    | 0.109  |
| 10    | 12.703    | 692628  | 39369  | 25.354 |
| 11    | 13.288    | 1552    | 140    | 0.057  |
| 12    | 13.998    | 14379   | 870    | 0.526  |
| 13    | 15.284    | 40837   | 2068   | 1.495  |
| 14    | 18.035    | 3578    | 196    | 0.131  |
| 15    | 19.212    | 87633   | 2502   | 3.208  |
| 16    | 21.769    | 8755    | 346    | 0.320  |
| 17    | 29.684    | 5195    | 120    | 0.190  |
| Total |           | 2731787 | 212733 |        |

mV

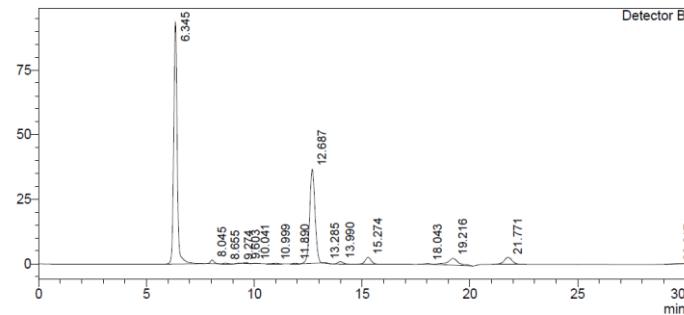

| Peak# | Ret. Time | Area    | Height | Conc.  |
|-------|-----------|---------|--------|--------|
| 1     | 6.345     | 1054424 | 93695  | 53.644 |
| 2     | 8.045     | 16897   | 1405   | 0.860  |
| 3     | 8.655     | 3423    | 265    | 0.174  |
| 4     | 9.274     | 1525    | 136    | 0.078  |
| 5     | 9.603     | 4202    | 337    | 0.214  |
| 6     | 10.041    | 2024    | 147    | 0.103  |
| 7     | 10.999    | 4450    | 238    | 0.226  |
| 8     | 11.890    | 2472    | 189    | 0.126  |
| 9     | 12.687    | 637545  | 36433  | 32.435 |
| 10    | 13.285    | 2624    | 214    | 0.134  |
| 11    | 13.990    | 15977   | 959    | 0.813  |
| 12    | 15.274    | 51582   | 2620   | 2.624  |
| 13    | 18.043    | 5535    | 295    | 0.282  |
| 14    | 19.216    | 91540   | 2632   | 4.657  |
| 15    | 21.771    | 68802   | 2662   | 3.500  |
| 16    | 29.817    | 2576    | 59     | 0.131  |
| Total |           | 1965599 | 142285 |        |



48 h

mV

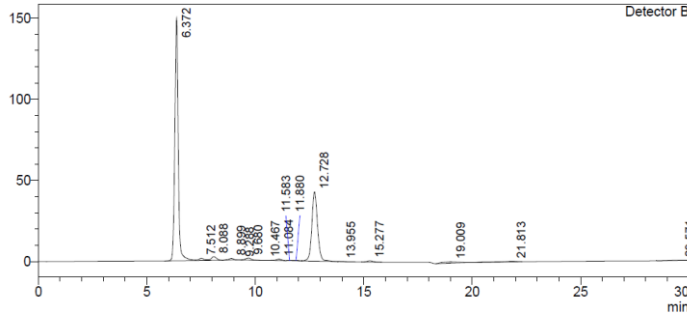

| Detector B   |           |                |               |        |
|--------------|-----------|----------------|---------------|--------|
| Peak#        | Ret. Time | Area           | Height        | Conc.  |
| 1            | 6.372     | 1624882        | 149624        | 61.886 |
| 2            | 7.512     | 23051          | 1322          | 0.878  |
| 3            | 8.088     | 38092          | 2278          | 1.451  |
| 4            | 8.899     | 15752          | 970           | 0.600  |
| 5            | 9.288     | 1014           | 114           | 0.039  |
| 6            | 9.680     | 23641          | 1235          | 0.900  |
| 7            | 10.467    | 283            | 30            | 0.011  |
| 8            | 11.084    | 17804          | 919           | 0.678  |
| 9            | 11.583    | 2401           | 167           | 0.091  |
| 10           | 11.880    | 6739           | 341           | 0.257  |
| 11           | 12.728    | 785402         | 42737         | 29.913 |
| 12           | 13.955    | 1229           | 84            | 0.047  |
| 13           | 15.277    | 16118          | 830           | 0.614  |
| 14           | 19.009    | 34640          | 702           | 1.319  |
| 15           | 21.813    | 25598          | 359           | 0.975  |
| 16           | 29.571    | 8963           | 187           | 0.341  |
| <b>Total</b> |           | <b>2625610</b> | <b>201900</b> |        |

mV

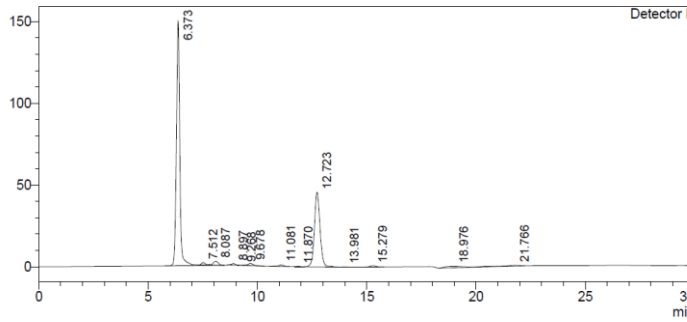

| Detector B   |           |                |               |        |
|--------------|-----------|----------------|---------------|--------|
| Peak#        | Ret. Time | Area           | Height        | Conc.  |
| 1            | 6.373     | 1626818        | 150068        | 61.018 |
| 2            | 7.512     | 19995          | 1467          | 0.750  |
| 3            | 8.087     | 38859          | 2401          | 1.458  |
| 4            | 8.897     | 11619          | 855           | 0.436  |
| 5            | 9.268     | 1685           | 162           | 0.063  |
| 6            | 9.678     | 23905          | 1284          | 0.897  |
| 7            | 11.081    | 16586          | 940           | 0.622  |
| 8            | 11.870    | 3137           | 210           | 0.118  |
| 9            | 12.723    | 823996         | 45648         | 30.906 |
| 10           | 13.981    | 1572           | 110           | 0.059  |
| 11           | 15.279    | 14924          | 755           | 0.560  |
| 12           | 18.976    | 46637          | 892           | 1.749  |
| 13           | 21.766    | 36404          | 462           | 1.365  |
| <b>Total</b> |           | <b>2666137</b> | <b>205254</b> |        |

Figure S3 Fed-batch LA fermentation on the corncob by NH<sub>3</sub> pretreatment

A: The curves of fermentation on 8% pretreated and washed corncob substrate fed to 16% corncob from 18 to 24 hat pH6.0 adjusted by CaCO<sub>3</sub>

0 h

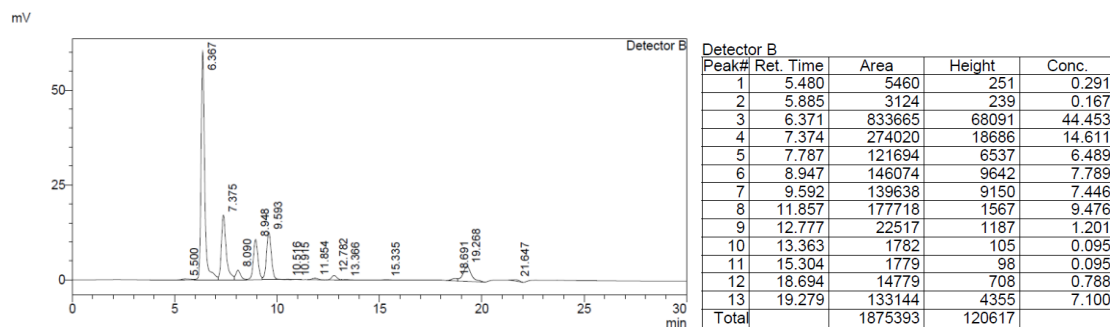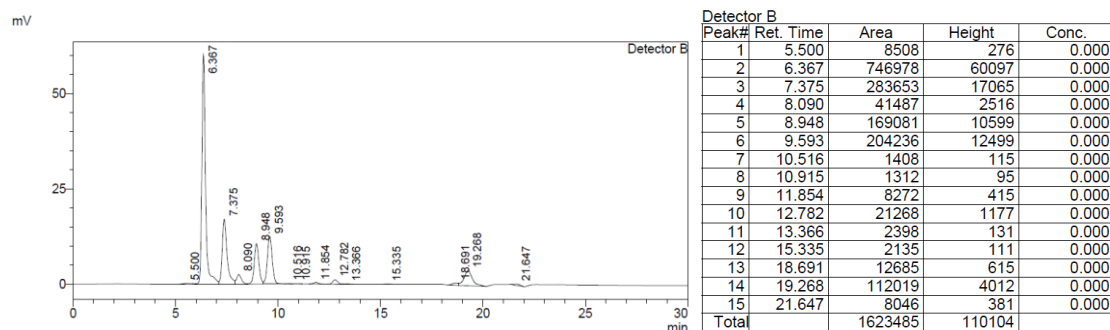

12 h

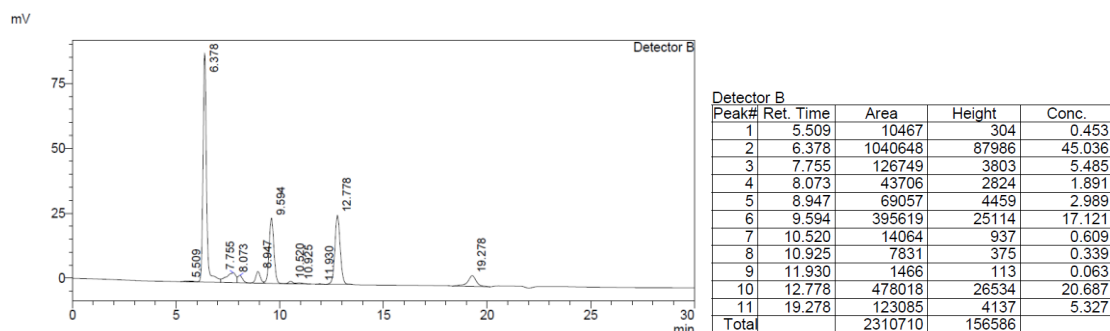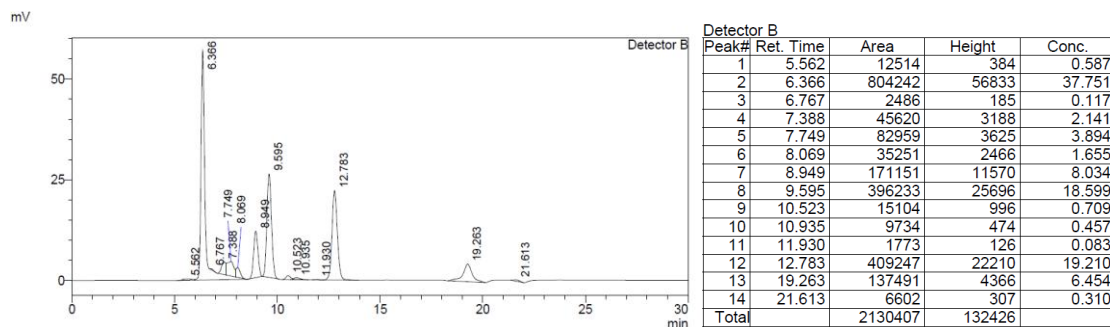

18 h

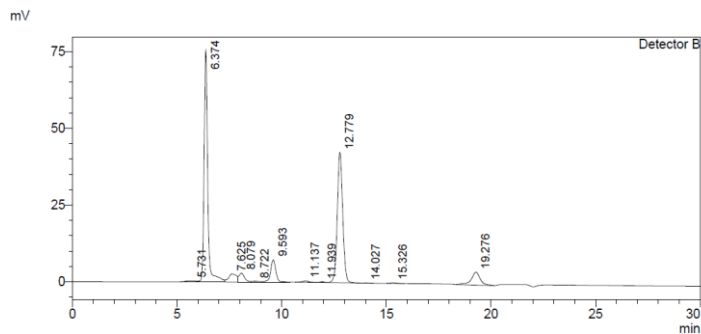

| Peak# | Ret. Time | Area    | Height | Conc. |
|-------|-----------|---------|--------|-------|
| 1     | 5.731     | 14160   | 393    | 0.000 |
| 2     | 6.374     | 912410  | 75437  | 0.000 |
| 3     | 7.625     | 71252   | 2653   | 0.000 |
| 4     | 8.079     | 54208   | 2896   | 0.000 |
| 5     | 8.722     | 8134    | 343    | 0.000 |
| 6     | 9.593     | 124067  | 7268   | 0.000 |
| 7     | 11.137    | 10321   | 507    | 0.000 |
| 8     | 11.939    | 2913    | 211    | 0.000 |
| 9     | 12.779    | 771277  | 42438  | 0.000 |
| 10    | 14.027    | 1144    | 78     | 0.000 |
| 11    | 15.326    | 4325    | 228    | 0.000 |
| 12    | 19.276    | 125602  | 4229   | 0.000 |
| Total |           | 2099812 | 136682 |       |

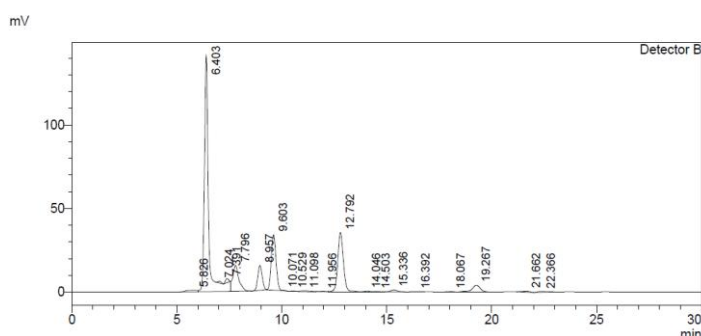

| Peak# | Ret. Time | Area    | Height | Conc.  |
|-------|-----------|---------|--------|--------|
| 1     | 5.826     | 32328   | 919    | 0.826  |
| 2     | 6.403     | 1947950 | 141275 | 49.751 |
| 3     | 7.024     | 11452   | 1157   | 0.292  |
| 4     | 7.391     | 25127   | 2417   | 0.642  |
| 5     | 7.796     | 317149  | 15529  | 8.100  |
| 6     | 8.957     | 220601  | 14860  | 5.634  |
| 7     | 9.603     | 512317  | 33218  | 13.085 |
| 8     | 10.071    | 1743    | 172    | 0.045  |
| 9     | 10.529    | 2962    | 255    | 0.076  |
| 10    | 11.098    | 15672   | 507    | 0.400  |
| 11    | 11.956    | 2446    | 169    | 0.062  |
| 12    | 12.792    | 656971  | 35459  | 16.779 |
| 13    | 14.046    | 5381    | 307    | 0.137  |
| 14    | 14.503    | 2979    | 160    | 0.076  |
| 15    | 15.336    | 22906   | 1151   | 0.585  |
| 16    | 16.392    | 1462    | 67     | 0.037  |
| 17    | 18.067    | 3089    | 171    | 0.079  |
| 18    | 19.267    | 109304  | 4097   | 2.792  |
| 19    | 21.662    | 11355   | 479    | 0.290  |
| 20    | 22.366    | 12235   | 410    | 0.312  |
| Total |           | 3915430 | 252778 |        |

24 h

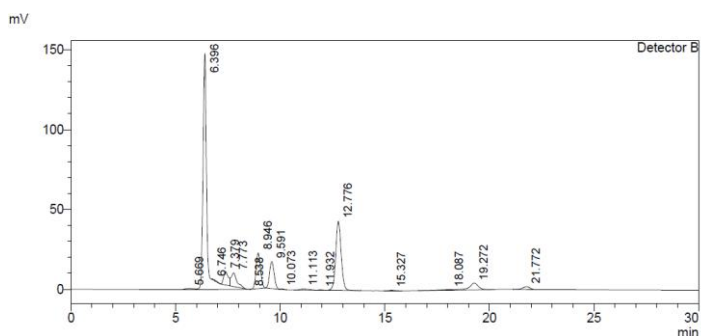

| Peak# | Ret. Time | Area    | Height | Conc.  |
|-------|-----------|---------|--------|--------|
| 1     | 5.669     | 25126   | 737    | 0.647  |
| 2     | 6.396     | 1956606 | 147589 | 50.400 |
| 3     | 6.746     | 7233    | 293    | 0.186  |
| 4     | 7.379     | 134781  | 8331   | 3.472  |
| 5     | 7.773     | 164634  | 8502   | 4.241  |
| 6     | 8.538     | 1       | -2     | 0.000  |
| 7     | 8.946     | 330324  | 22238  | 8.509  |
| 8     | 9.591     | 252787  | 16895  | 6.511  |
| 9     | 10.073    | 3390    | 317    | 0.087  |
| 10    | 11.113    | 20317   | 802    | 0.523  |
| 11    | 11.932    | 3203    | 232    | 0.083  |
| 12    | 12.776    | 786212  | 43260  | 20.252 |
| 13    | 15.327    | 4775    | 249    | 0.123  |
| 14    | 18.087    | 16397   | 340    | 0.422  |
| 15    | 19.272    | 132261  | 4287   | 3.407  |
| 16    | 21.772    | 44133   | 1874   | 1.137  |
| Total |           | 3882179 | 255944 |        |

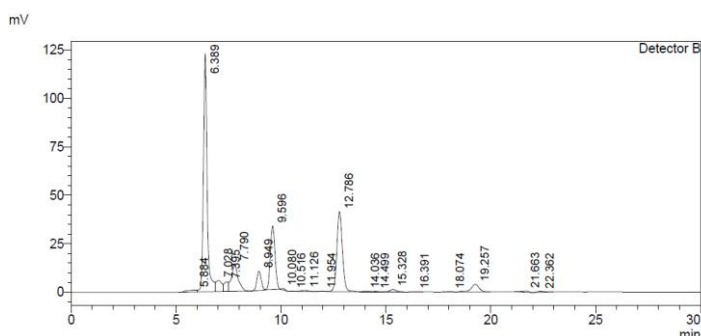

| Peak# | Ret. Time | Area    | Height | Conc.  |
|-------|-----------|---------|--------|--------|
| 1     | 5.884     | 31436   | 959    | 0.862  |
| 2     | 6.389     | 1512635 | 122287 | 41.459 |
| 3     | 7.028     | 111921  | 5730   | 3.068  |
| 4     | 7.395     | 68352   | 4916   | 1.873  |
| 5     | 7.790     | 316657  | 14312  | 8.679  |
| 6     | 8.949     | 147245  | 9880   | 4.036  |
| 7     | 9.596     | 499952  | 32740  | 13.703 |
| 8     | 10.080    | 9717    | 852    | 0.266  |
| 9     | 10.516    | 858     | 90     | 0.024  |
| 10    | 11.126    | 16125   | 636    | 0.442  |
| 11    | 11.954    | 2431    | 176    | 0.067  |
| 12    | 12.786    | 764179  | 41333  | 20.945 |
| 13    | 14.036    | 4713    | 298    | 0.129  |
| 14    | 14.499    | 3078    | 167    | 0.084  |
| 15    | 15.328    | 25400   | 1276   | 0.696  |
| 16    | 16.391    | 1485    | 67     | 0.041  |
| 17    | 18.074    | 3545    | 196    | 0.097  |
| 18    | 19.257    | 104886  | 3951   | 2.875  |
| 19    | 21.663    | 12624   | 519    | 0.346  |
| 20    | 22.362    | 11228   | 392    | 0.308  |
| Total |           | 3648470 | 240777 |        |

36 h

mV

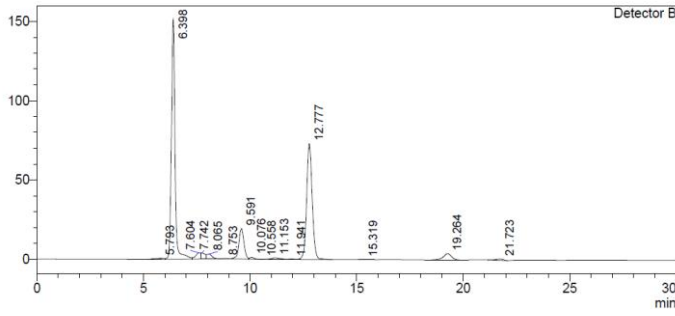

| Peak# | Ret. Time | Area    | Height | Conc.  |
|-------|-----------|---------|--------|--------|
| 1     | 5.793     | 25401   | 1747   | 0.664  |
| 2     | 6.398     | 1784548 | 151223 | 46.675 |
| 3     | 7.604     | 64552   | 3918   | 1.688  |
| 4     | 7.742     | 52792   | 3814   | 1.381  |
| 5     | 8.065     | 53893   | 3127   | 1.410  |
| 6     | 8.753     | 5447    | 281    | 0.142  |
| 7     | 9.591     | 312418  | 19218  | 8.171  |
| 8     | 10.076    | 15871   | 1127   | 0.415  |
| 9     | 10.558    | 67      | 11     | 0.002  |
| 10    | 11.153    | 29880   | 1048   | 0.782  |
| 11    | 11.941    | 5854    | 360    | 0.153  |
| 12    | 12.777    | 1339193 | 73165  | 35.026 |
| 13    | 15.319    | 1390    | 75     | 0.036  |
| 14    | 19.264    | 113873  | 4119   | 2.978  |
| 15    | 21.723    | 18199   | 776    | 0.476  |
| Total |           | 3823378 | 263009 |        |

mV

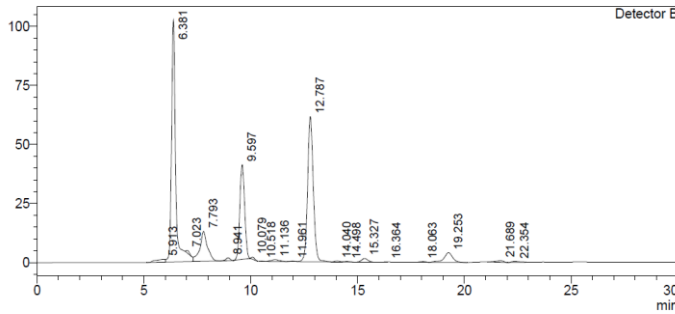

| Peak# | Ret. Time | Area    | Height | Conc.  |
|-------|-----------|---------|--------|--------|
| 1     | 5.913     | 35937   | 1147   | 0.959  |
| 2     | 6.381     | 1386479 | 102405 | 36.987 |
| 3     | 7.023     | 11760   | 1052   | 0.314  |
| 4     | 7.793     | 316805  | 12653  | 8.451  |
| 5     | 8.941     | 17331   | 1200   | 0.462  |
| 6     | 9.597     | 620890  | 40112  | 16.563 |
| 7     | 10.079    | 9257    | 871    | 0.247  |
| 8     | 10.518    | 917     | 98     | 0.024  |
| 9     | 11.136    | 23494   | 884    | 0.627  |
| 10    | 11.961    | 3540    | 237    | 0.094  |
| 11    | 12.787    | 1140299 | 61494  | 30.420 |
| 12    | 14.040    | 5094    | 335    | 0.136  |
| 13    | 14.498    | 2102    | 138    | 0.056  |
| 14    | 15.327    | 30955   | 1549   | 0.826  |
| 15    | 16.364    | 1003    | 75     | 0.027  |
| 16    | 18.063    | 4058    | 221    | 0.108  |
| 17    | 19.253    | 112472  | 4098   | 3.000  |
| 18    | 21.689    | 16189   | 672    | 0.432  |
| 19    | 22.354    | 9973    | 353    | 0.266  |
| Total |           | 3748555 | 229596 |        |

42 h

mV

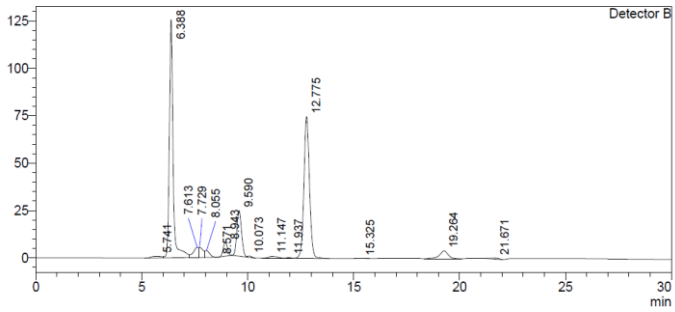

| Peak# | Ret. Time | Area    | Height | Conc.  |
|-------|-----------|---------|--------|--------|
| 1     | 5.741     | 29729   | 876    | 0.779  |
| 2     | 6.388     | 1551004 | 125467 | 40.663 |
| 3     | 7.613     | 92298   | 5314   | 2.420  |
| 4     | 7.729     | 74047   | 5248   | 1.941  |
| 5     | 8.055     | 57791   | 3603   | 1.515  |
| 6     | 8.571     | 2       | -4     | 0.000  |
| 7     | 8.943     | 104325  | 7369   | 2.735  |
| 8     | 9.590     | 363393  | 23940  | 9.527  |
| 9     | 10.073    | 9178    | 752    | 0.241  |
| 10    | 11.147    | 29084   | 1029   | 0.762  |
| 11    | 11.937    | 4655    | 330    | 0.122  |
| 12    | 12.775    | 1364400 | 74789  | 35.771 |
| 13    | 15.325    | 2059    | 108    | 0.054  |
| 14    | 19.264    | 120240  | 4196   | 3.152  |
| 15    | 21.671    | 12074   | 513    | 0.317  |
| Total |           | 3814278 | 253532 |        |

mV

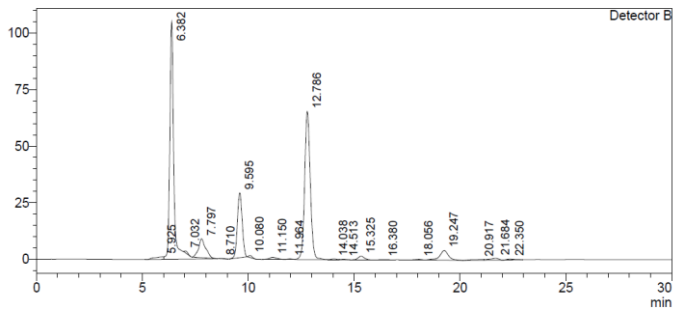

| Peak# | Ret. Time | Area    | Height | Conc.  |
|-------|-----------|---------|--------|--------|
| 1     | 5.925     | 34477   | 1141   | 0.967  |
| 2     | 6.382     | 1408376 | 105002 | 39.521 |
| 3     | 7.032     | 9281    | 796    | 0.260  |
| 4     | 7.797     | 196135  | 8381   | 5.504  |
| 5     | 8.710     | 3124    | 179    | 0.088  |
| 6     | 9.595     | 444949  | 28615  | 12.486 |
| 7     | 10.080    | 10466   | 924    | 0.294  |
| 8     | 11.150    | 24302   | 1003   | 0.682  |
| 9     | 11.964    | 4334    | 280    | 0.122  |
| 10    | 12.786    | 1215076 | 65459  | 34.097 |
| 11    | 14.038    | 5038    | 320    | 0.141  |
| 12    | 14.513    | 2961    | 168    | 0.083  |
| 13    | 15.325    | 32607   | 1625   | 0.915  |
| 14    | 16.380    | 1766    | 73     | 0.050  |
| 15    | 18.056    | 3733    | 205    | 0.105  |
| 16    | 19.247    | 120516  | 4258   | 3.382  |
| 17    | 20.917    | 13103   | 302    | 0.368  |
| 18    | 21.684    | 24160   | 805    | 0.678  |
| 19    | 22.350    | 9216    | 325    | 0.259  |
| Total |           | 3563618 | 219862 |        |

48 h

mV

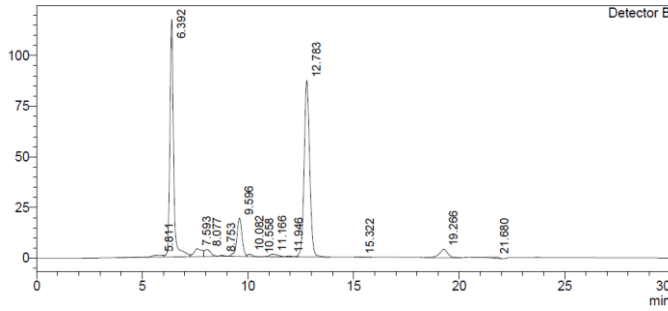

| Peak# | Ret. Time | Area    | Height | Conc.  |
|-------|-----------|---------|--------|--------|
| 1     | 5.811     | 32307   | 917    | 0.864  |
| 2     | 6.392     | 1432481 | 117220 | 38.310 |
| 3     | 7.593     | 105120  | 3814   | 2.811  |
| 4     | 8.077     | 66408   | 3389   | 1.776  |
| 5     | 8.753     | 6534    | 373    | 0.175  |
| 6     | 9.596     | 310248  | 18798  | 8.297  |
| 7     | 10.082    | 16909   | 1183   | 0.452  |
| 8     | 10.556    | 68      | 10     | 0.002  |
| 9     | 11.166    | 35839   | 1272   | 0.958  |
| 10    | 11.946    | 7091    | 429    | 0.190  |
| 11    | 12.783    | 1593322 | 86967  | 42.611 |
| 12    | 15.322    | 2297    | 121    | 0.061  |
| 13    | 19.266    | 118069  | 4158   | 3.158  |
| 14    | 21.680    | 12500   | 524    | 0.334  |
| Total |           | 3739195 | 239174 |        |

mV

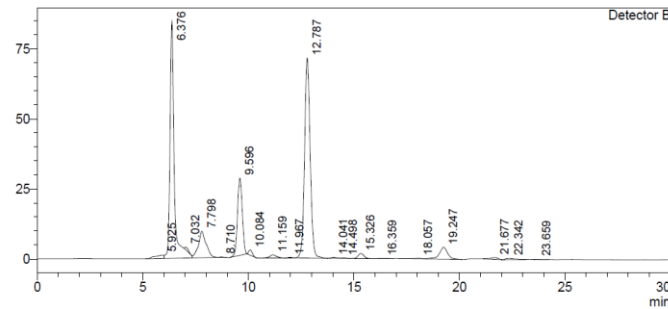

| Peak# | Ret. Time | Area    | Height | Conc.  |
|-------|-----------|---------|--------|--------|
| 1     | 5.925     | 35533   | 1185   | 1.026  |
| 2     | 6.376     | 1170978 | 84567  | 33.816 |
| 3     | 7.032     | 11387   | 930    | 0.329  |
| 4     | 7.798     | 238663  | 9404   | 6.892  |
| 5     | 8.710     | 2152    | 181    | 0.062  |
| 6     | 9.596     | 425313  | 27551  | 12.282 |
| 7     | 10.084    | 22590   | 1878   | 0.652  |
| 8     | 11.159    | 28204   | 1162   | 0.814  |
| 9     | 11.967    | 3890    | 278    | 0.112  |
| 10    | 12.787    | 1323071 | 71423  | 38.208 |
| 11    | 14.041    | 5178    | 361    | 0.150  |
| 12    | 14.498    | 2318    | 149    | 0.067  |
| 13    | 15.326    | 37215   | 1861   | 1.075  |
| 14    | 16.359    | 1895    | 82     | 0.055  |
| 15    | 18.057    | 3806    | 210    | 0.110  |
| 16    | 19.247    | 117676  | 4202   | 3.398  |
| 17    | 21.677    | 15923   | 669    | 0.460  |
| 18    | 22.342    | 14640   | 397    | 0.423  |
| 19    | 23.659    | 2356    | 92     | 0.068  |
| Total |           | 3462789 | 206583 |        |

60 h

mV

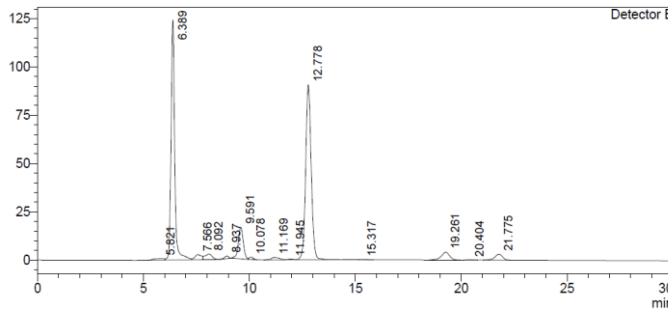

| Peak# | Ret. Time | Area    | Height | Conc.  |
|-------|-----------|---------|--------|--------|
| 1     | 5.821     | 28378   | 842    | 0.740  |
| 2     | 6.389     | 1485174 | 123781 | 38.729 |
| 3     | 7.566     | 58137   | 2670   | 1.516  |
| 4     | 8.092     | 67282   | 2933   | 1.754  |
| 5     | 8.937     | 18884   | 1367   | 0.492  |
| 6     | 9.591     | 258856  | 16271  | 6.750  |
| 7     | 10.078    | 16846   | 1250   | 0.439  |
| 8     | 11.169    | 35739   | 1298   | 0.932  |
| 9     | 11.945    | 6705    | 414    | 0.175  |
| 10    | 12.778    | 1660303 | 90468  | 43.296 |
| 11    | 15.317    | 3010    | 152    | 0.078  |
| 12    | 19.261    | 117578  | 4171   | 3.066  |
| 13    | 20.404    | 2450    | 112    | 0.064  |
| 14    | 21.775    | 75468   | 3056   | 1.968  |
| Total |           | 3834810 | 248785 |        |

mV

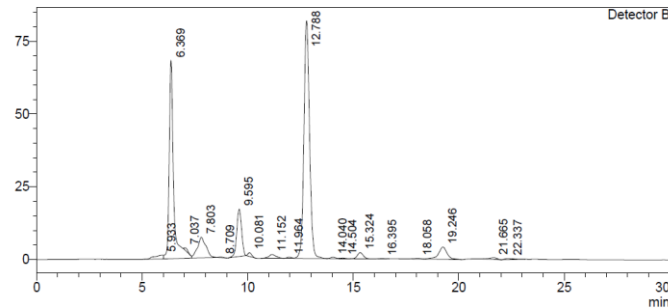

| Peak# | Ret. Time | Area    | Height | Conc.  |
|-------|-----------|---------|--------|--------|
| 1     | 5.933     | 37157   | 1230   | 1.134  |
| 2     | 6.369     | 992117  | 68074  | 30.282 |
| 3     | 7.037     | 10083   | 826    | 0.308  |
| 4     | 7.803     | 198117  | 7066   | 6.047  |
| 5     | 8.709     | 2971    | 240    | 0.091  |
| 6     | 9.595     | 253835  | 16235  | 7.748  |
| 7     | 10.081    | 15968   | 1302   | 0.487  |
| 8     | 11.152    | 33444   | 1326   | 1.021  |
| 9     | 11.964    | 7429    | 447    | 0.227  |
| 10    | 12.788    | 1519341 | 81629  | 46.374 |
| 11    | 14.040    | 7589    | 468    | 0.232  |
| 12    | 14.504    | 3489    | 204    | 0.106  |
| 13    | 15.324    | 42737   | 2129   | 1.304  |
| 14    | 16.395    | 1539    | 84     | 0.047  |
| 15    | 18.058    | 3978    | 220    | 0.121  |
| 16    | 19.246    | 119503  | 4221   | 3.648  |
| 17    | 21.665    | 14866   | 623    | 0.454  |
| 18    | 22.337    | 12126   | 398    | 0.370  |
| Total |           | 3276290 | 186722 |        |

66 h

mV

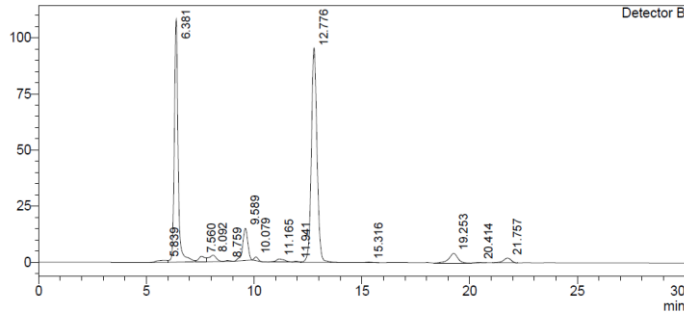

| Peak# | Ret. Time | Area    | Height | Conc.  |
|-------|-----------|---------|--------|--------|
| 1     | 5.839     | 28675   | 871    | 0.775  |
| 2     | 6.381     | 1320347 | 108101 | 35.664 |
| 3     | 7.560     | 51043   | 2474   | 1.379  |
| 4     | 8.092     | 68711   | 2900   | 1.856  |
| 5     | 8.759     | 6107    | 373    | 0.165  |
| 6     | 9.589     | 230984  | 14262  | 6.239  |
| 7     | 10.079    | 20748   | 1670   | 0.560  |
| 8     | 11.165    | 39950   | 1438   | 1.079  |
| 9     | 11.941    | 7831    | 466    | 0.212  |
| 10    | 12.776    | 1751967 | 95384  | 47.322 |
| 11    | 15.316    | 3283    | 166    | 0.089  |
| 12    | 19.253    | 119828  | 4264   | 3.237  |
| 13    | 20.414    | 2620    | 120    | 0.071  |
| 14    | 21.757    | 50093   | 2082   | 1.353  |
| Total |           | 3702188 | 234571 |        |

mV

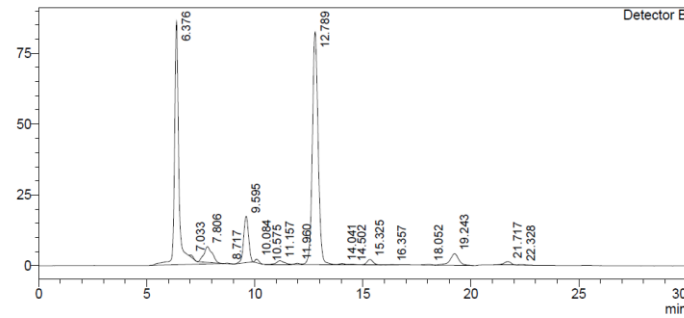

| Peak# | Ret. Time | Area    | Height | Conc.  |
|-------|-----------|---------|--------|--------|
| 1     | 6.376     | 1244511 | 85940  | 36.060 |
| 2     | 7.033     | 7331    | 621    | 0.212  |
| 3     | 7.806     | 151349  | 5603   | 4.385  |
| 4     | 8.717     | 3799    | 251    | 0.110  |
| 5     | 9.595     | 258050  | 16389  | 7.477  |
| 6     | 10.084    | 15725   | 1264   | 0.456  |
| 7     | 10.575    | 72      | 10     | 0.002  |
| 8     | 11.157    | 33500   | 1313   | 0.971  |
| 9     | 11.960    | 7655    | 452    | 0.222  |
| 10    | 12.789    | 1525318 | 82199  | 44.197 |
| 11    | 14.041    | 6491    | 419    | 0.188  |
| 12    | 14.502    | 3263    | 183    | 0.095  |
| 13    | 15.325    | 38636   | 1929   | 1.119  |
| 14    | 16.357    | 1942    | 80     | 0.056  |
| 15    | 18.052    | 3790    | 211    | 0.110  |
| 16    | 19.243    | 117129  | 4115   | 3.394  |
| 17    | 21.717    | 28481   | 1240   | 0.825  |
| 18    | 22.328    | 4163    | 187    | 0.121  |
| Total |           | 3451206 | 202409 |        |

72 h

mV

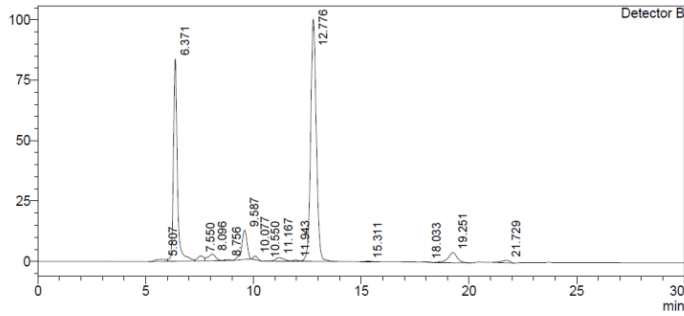

| Peak# | Ret. Time | Area    | Height | Conc.  |
|-------|-----------|---------|--------|--------|
| 1     | 5.807     | 30224   | 896    | 0.871  |
| 2     | 6.371     | 1064583 | 83655  | 30.690 |
| 3     | 7.550     | 42321   | 2132   | 1.220  |
| 4     | 8.096     | 64052   | 2721   | 1.846  |
| 5     | 8.756     | 6133    | 350    | 0.177  |
| 6     | 9.587     | 201536  | 12200  | 5.810  |
| 7     | 10.077    | 19206   | 1539   | 0.554  |
| 8     | 10.550    | 33      | 8      | 0.001  |
| 9     | 11.167    | 39880   | 1477   | 1.150  |
| 10    | 11.943    | 8677    | 508    | 0.250  |
| 11    | 12.776    | 1840594 | 99945  | 53.061 |
| 12    | 15.311    | 4380    | 220    | 0.126  |
| 13    | 18.033    | 1406    | 88     | 0.041  |
| 14    | 19.251    | 121220  | 4181   | 3.495  |
| 15    | 21.729    | 24595   | 1045   | 0.709  |
| Total |           | 3468839 | 211006 |        |

mV

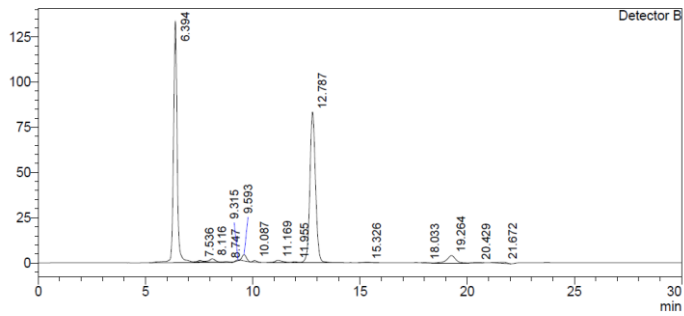

| Peak# | Ret. Time | Area    | Height | Conc.  |
|-------|-----------|---------|--------|--------|
| 1     | 6.394     | 1604709 | 133180 | 46.725 |
| 2     | 7.536     | 12282   | 818    | 0.358  |
| 3     | 8.116     | 38108   | 1824   | 1.110  |
| 4     | 8.747     | 4921    | 359    | 0.143  |
| 5     | 9.315     | 4490    | 363    | 0.131  |
| 6     | 9.593     | 46994   | 3416   | 1.368  |
| 7     | 10.087    | 10956   | 849    | 0.319  |
| 8     | 11.169    | 30326   | 1223   | 0.883  |
| 9     | 11.955    | 7288    | 428    | 0.212  |
| 10    | 12.787    | 1536056 | 83424  | 44.726 |
| 11    | 15.326    | 6245    | 307    | 0.182  |
| 12    | 18.033    | 1416    | 85     | 0.041  |
| 13    | 19.264    | 114243  | 4109   | 3.326  |
| 14    | 20.429    | 2303    | 105    | 0.067  |
| 15    | 21.672    | 14040   | 551    | 0.409  |
| Total |           | 3434377 | 231040 |        |

84 h

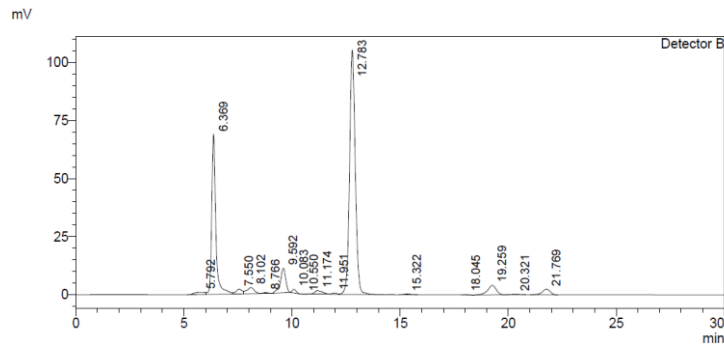

| Peak# | Ret. Time | Area    | Height | Conc.  |
|-------|-----------|---------|--------|--------|
| 1     | 5.792     | 31270   | 916    | 0.914  |
| 2     | 6.369     | 907211  | 68797  | 26.519 |
| 3     | 7.550     | 40907   | 2060   | 1.196  |
| 4     | 8.102     | 62939   | 2676   | 1.840  |
| 5     | 8.766     | 6099    | 388    | 0.178  |
| 6     | 9.592     | 176933  | 10531  | 5.172  |
| 7     | 10.083    | 19882   | 1574   | 0.581  |
| 8     | 10.550    | 38      | 8      | 0.001  |
| 9     | 11.174    | 40744   | 1537   | 1.191  |
| 10    | 11.951    | 8848    | 523    | 0.259  |
| 11    | 12.783    | 1940222 | 105174 | 56.716 |
| 12    | 15.322    | 5159    | 259    | 0.151  |
| 13    | 18.045    | 1596    | 96     | 0.047  |
| 14    | 19.259    | 114859  | 4130   | 3.358  |
| 15    | 20.321    | 4514    | 184    | 0.132  |
| 16    | 21.769    | 59726   | 2444   | 1.746  |
| Total |           | 3420948 | 201296 |        |

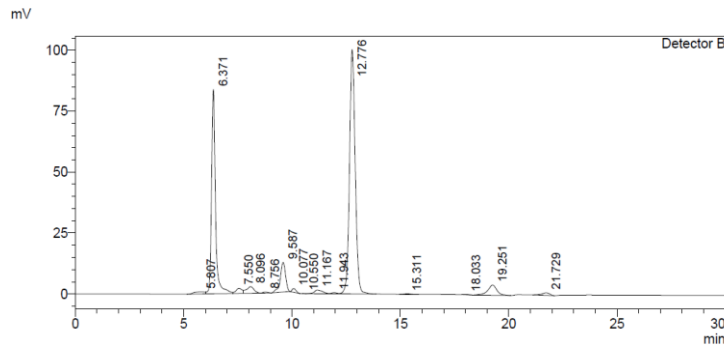

| Peak# | Ret. Time | Area    | Height | Conc.  |
|-------|-----------|---------|--------|--------|
| 1     | 5.807     | 30224   | 896    | 0.871  |
| 2     | 6.371     | 1064583 | 83655  | 30.690 |
| 3     | 7.550     | 42321   | 2132   | 1.220  |
| 4     | 8.096     | 64052   | 2721   | 1.846  |
| 5     | 8.756     | 6133    | 390    | 0.177  |
| 6     | 9.587     | 201536  | 12200  | 5.810  |
| 7     | 10.077    | 19206   | 1539   | 0.554  |
| 8     | 10.550    | 33      | 8      | 0.001  |
| 9     | 11.167    | 39880   | 1477   | 1.150  |
| 10    | 11.943    | 8677    | 508    | 0.250  |
| 11    | 12.776    | 1840594 | 99945  | 53.061 |
| 12    | 15.311    | 4380    | 220    | 0.126  |
| 13    | 18.033    | 1406    | 88     | 0.041  |
| 14    | 19.251    | 121220  | 4181   | 3.495  |
| 15    | 21.729    | 24595   | 1045   | 0.709  |
| Total |           | 3468839 | 211006 |        |

90 h

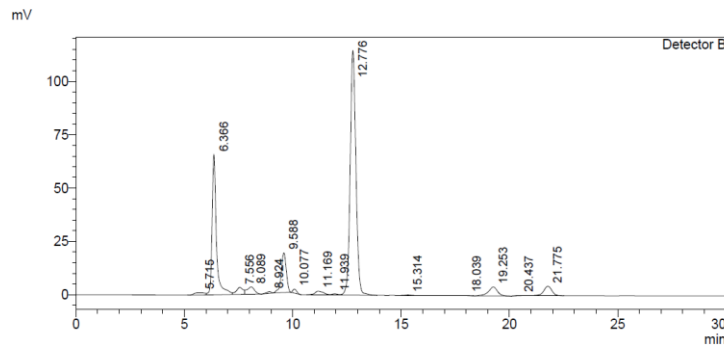

| Peak# | Ret. Time | Area    | Height | Conc.  |
|-------|-----------|---------|--------|--------|
| 1     | 5.715     | 35947   | 1059   | 0.936  |
| 2     | 6.366     | 908209  | 65583  | 23.644 |
| 3     | 7.556     | 72789   | 3261   | 1.895  |
| 4     | 8.089     | 82017   | 3459   | 2.135  |
| 5     | 8.924     | 12293   | 813    | 0.320  |
| 6     | 9.588     | 293218  | 18582  | 7.633  |
| 7     | 10.077    | 23407   | 1910   | 0.609  |
| 8     | 11.169    | 49572   | 1746   | 1.291  |
| 9     | 11.939    | 10369   | 600    | 0.270  |
| 10    | 12.776    | 2109226 | 114444 | 54.911 |
| 11    | 15.314    | 4032    | 201    | 0.105  |
| 12    | 18.039    | 1707    | 103    | 0.044  |
| 13    | 19.253    | 123145  | 4229   | 3.206  |
| 14    | 20.437    | 3091    | 140    | 0.080  |
| 15    | 21.775    | 112181  | 4387   | 2.920  |
| Total |           | 3841202 | 220516 |        |

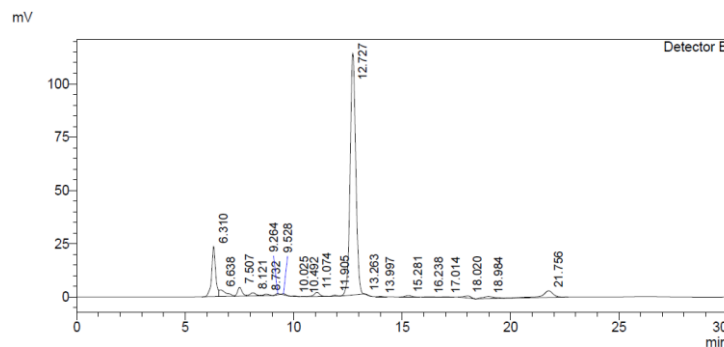

| Peak# | Ret. Time | Area    | Height | Conc.  |
|-------|-----------|---------|--------|--------|
| 1     | 6.310     | 304389  | 23500  | 10.955 |
| 2     | 6.638     | 68041   | 3072   | 2.449  |
| 3     | 7.507     | 60125   | 4171   | 2.164  |
| 4     | 8.121     | 28688   | 1457   | 1.033  |
| 5     | 8.732     | 13114   | 691    | 0.472  |
| 6     | 9.264     | 5923    | 544    | 0.213  |
| 7     | 9.628     | 5351    | 463    | 0.193  |
| 8     | 10.025    | 3070    | 256    | 0.111  |
| 9     | 10.492    | 132     | 13     | 0.005  |
| 10    | 11.074    | 35967   | 1990   | 1.294  |
| 11    | 11.905    | 7907    | 580    | 0.285  |
| 12    | 12.727    | 2049582 | 113349 | 73.765 |
| 13    | 13.263    | 2511    | 76     | 0.090  |
| 14    | 13.997    | 2234    | 156    | 0.080  |
| 15    | 15.281    | 13581   | 691    | 0.489  |
| 16    | 16.238    | 2439    | 98     | 0.088  |
| 17    | 17.014    | 1781    | 86     | 0.064  |
| 18    | 18.020    | 21949   | 1004   | 0.790  |
| 19    | 18.984    | 39571   | 993    | 1.424  |
| 20    | 21.756    | 112162  | 3084   | 4.037  |
| Total |           | 2778520 | 156274 |        |

**B:** The curves of fermentation on 8% pretreated and unwashed corncob substrate fed to 18.4% corncob at 24 h at pH6.0 adjusted by automatic feeding of NaOH solution.

**0 h**

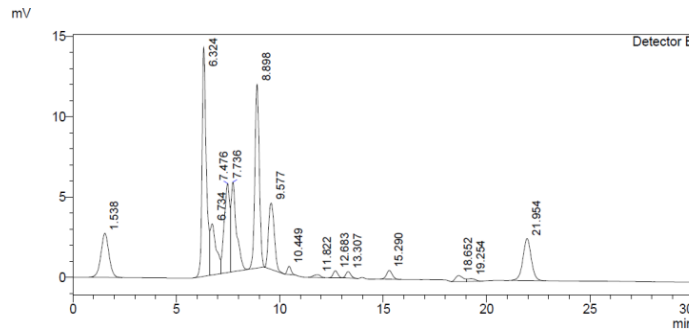

| Peak#        | Ret. Time | Area          | Height       | Conc.  |
|--------------|-----------|---------------|--------------|--------|
| 1            | 1.538     | 73798         | 2746         | 8.033  |
| 2            | 6.324     | 203582        | 14224        | 22.160 |
| 3            | 6.734     | 63446         | 3185         | 6.906  |
| 4            | 7.476     | 102762        | 5548         | 11.186 |
| 5            | 7.736     | 103650        | 5577         | 11.262 |
| 6            | 8.898     | 171207        | 11434        | 18.636 |
| 7            | 9.577     | 78802         | 4123         | 8.578  |
| 8            | 10.449    | 6343          | 501          | 0.690  |
| 9            | 11.822    | 4161          | 182          | 0.453  |
| 10           | 12.683    | 6848          | 432          | 0.745  |
| 11           | 13.307    | 6708          | 405          | 0.730  |
| 12           | 15.290    | 10658         | 543          | 1.160  |
| 13           | 18.652    | 9848          | 373          | 1.072  |
| 14           | 19.254    | 4548          | 181          | 0.495  |
| 15           | 21.954    | 72337         | 2611         | 7.874  |
| <b>Total</b> |           | <b>918698</b> | <b>52064</b> |        |

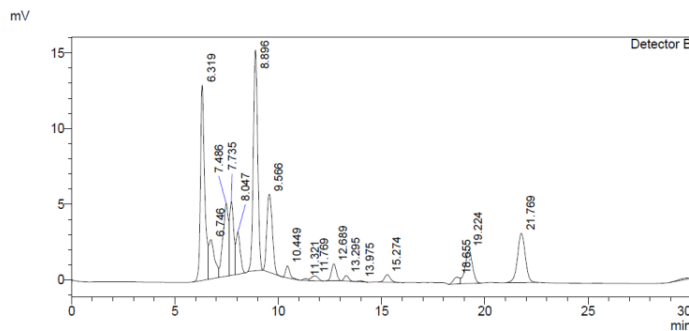

| Peak#        | Ret. Time | Area          | Height       | Conc.  |
|--------------|-----------|---------------|--------------|--------|
| 1            | 0.218     | 72589         | 434          | 8.012  |
| 2            | 6.327     | 123506        | 7570         | 13.632 |
| 3            | 6.720     | 62176         | 3114         | 6.863  |
| 4            | 7.460     | 91118         | 5874         | 10.057 |
| 5            | 7.705     | 155397        | 8538         | 17.152 |
| 6            | 8.844     | 146690        | 9642         | 16.191 |
| 7            | 9.505     | 88019         | 4115         | 9.715  |
| 8            | 10.431    | 13485         | 919          | 1.488  |
| 9            | 10.867    | 1063          | 74           | 0.117  |
| 10           | 11.211    | 1086          | 64           | 0.120  |
| 11           | 11.960    | 3720          | 230          | 0.411  |
| 12           | 12.702    | 6357          | 436          | 0.702  |
| 13           | 13.253    | 11078         | 700          | 1.223  |
| 14           | 14.036    | 2498          | 164          | 0.276  |
| 15           | 15.309    | 13699         | 696          | 1.512  |
| 16           | 18.894    | 15511         | 436          | 1.712  |
| 17           | 21.633    | 97991         | 3699         | 10.816 |
| <b>Total</b> |           | <b>905984</b> | <b>46705</b> |        |

**12 h**

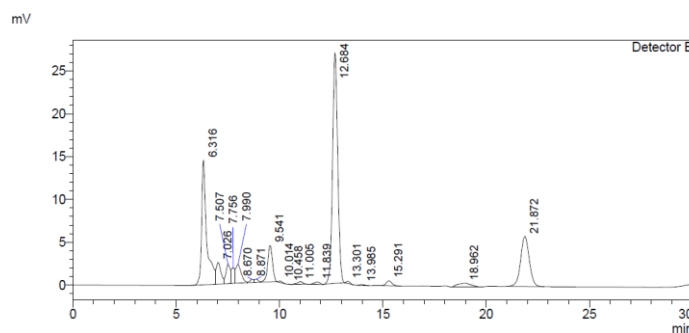

| Peak#        | Ret. Time | Area           | Height       | Conc.  |
|--------------|-----------|----------------|--------------|--------|
| 1            | 6.316     | 247710         | 14522        | 21.633 |
| 2            | 7.026     | 42002          | 2539         | 3.668  |
| 3            | 7.507     | 32030          | 2225         | 2.797  |
| 4            | 7.756     | 21690          | 1817         | 1.894  |
| 5            | 7.990     | 39453          | 2171         | 3.445  |
| 6            | 8.670     | 4320           | 349          | 0.377  |
| 7            | 8.871     | 4325           | 340          | 0.378  |
| 8            | 9.541     | 66385          | 4248         | 5.797  |
| 9            | 10.014    | 2029           | 167          | 0.177  |
| 10           | 10.458    | 27             | 6            | 0.002  |
| 11           | 11.005    | 5560           | 300          | 0.486  |
| 12           | 11.839    | 5244           | 272          | 0.458  |
| 13           | 12.684    | 469457         | 26867        | 40.998 |
| 14           | 13.301    | 3091           | 246          | 0.270  |
| 15           | 13.985    | 1733           | 114          | 0.151  |
| 16           | 15.291    | 11448          | 591          | 1.000  |
| 17           | 18.962    | 19914          | 448          | 1.739  |
| 18           | 21.872    | 168657         | 5827         | 14.729 |
| <b>Total</b> |           | <b>1145075</b> | <b>63050</b> |        |

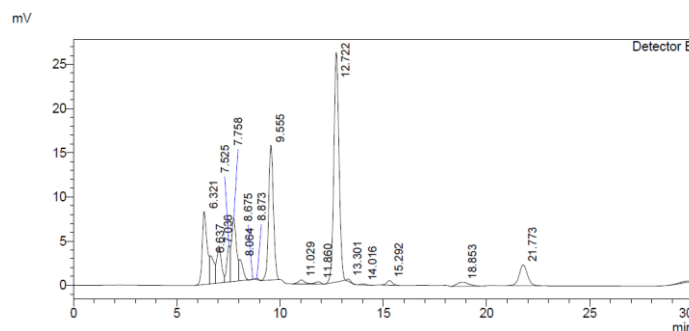

| Peak#        | Ret. Time | Area           | Height       | Conc.  |
|--------------|-----------|----------------|--------------|--------|
| 1            | 6.321     | 135210         | 8246         | 10.711 |
| 2            | 6.637     | 46816          | 3166         | 3.709  |
| 3            | 7.036     | 67599          | 4171         | 5.355  |
| 4            | 7.525     | 46842          | 4115         | 3.711  |
| 5            | 7.758     | 120506         | 7140         | 9.546  |
| 6            | 8.064     | 30810          | 2402         | 2.441  |
| 7            | 8.675     | 266            | 33           | 0.021  |
| 8            | 8.873     | 1088           | 112          | 0.086  |
| 9            | 9.555     | 239335         | 15219        | 18.960 |
| 10           | 11.029    | 10145          | 466          | 0.804  |
| 11           | 11.860    | 5590           | 265          | 0.443  |
| 12           | 12.722    | 455617         | 25944        | 36.094 |
| 13           | 13.301    | 3477           | 279          | 0.275  |
| 14           | 14.016    | 2145           | 142          | 0.170  |
| 15           | 15.292    | 10022          | 524          | 0.794  |
| 16           | 18.853    | 17683          | 447          | 1.401  |
| 17           | 21.773    | 63878          | 2344         | 5.060  |
| 18           | 29.751    | 5281           | 136          | 0.418  |
| <b>Total</b> |           | <b>1262311</b> | <b>75152</b> |        |



18 h

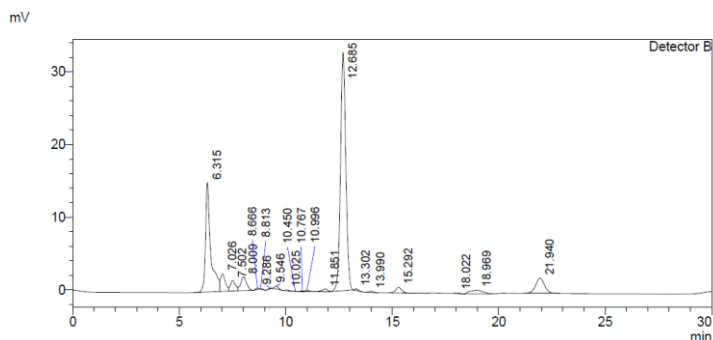

| Peak# | Ret. Time | Area    | Height | Conc.  |
|-------|-----------|---------|--------|--------|
| 1     | 6.315     | 253326  | 15049  | 24.170 |
| 2     | 7.026     | 39907   | 2438   | 3.808  |
| 3     | 7.502     | 23838   | 1443   | 2.274  |
| 4     | 8.009     | 36181   | 1908   | 3.452  |
| 5     | 8.666     | 2007    | 205    | 0.191  |
| 6     | 8.813     | 382     | 18     | 0.036  |
| 7     | 9.286     | 860     | 75     | 0.082  |
| 8     | 9.546     | 4916    | 373    | 0.469  |
| 9     | 10.025    | 1570    | 112    | 0.150  |
| 10    | 10.450    | 56      | 12     | 0.005  |
| 11    | 10.767    | 935     | 94     | 0.089  |
| 12    | 10.996    | 3057    | 199    | 0.292  |
| 13    | 11.851    | 6499    | 335    | 0.620  |
| 14    | 12.665    | 571702  | 32693  | 54.547 |
| 15    | 13.302    | 2845    | 232    | 0.271  |
| 16    | 13.990    | 2360    | 155    | 0.225  |
| 17    | 15.292    | 14791   | 760    | 1.411  |
| 18    | 18.022    | 1015    | 65     | 0.097  |
| 19    | 18.969    | 21896   | 522    | 2.089  |
| 20    | 21.940    | 59955   | 2094   | 5.720  |
| Total |           | 1048097 | 58779  |        |

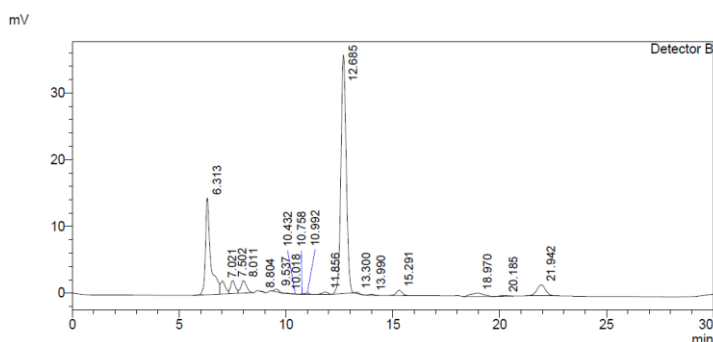

| Peak# | Ret. Time | Area    | Height | Conc.  |
|-------|-----------|---------|--------|--------|
| 1     | 6.313     | 247292  | 14520  | 22.935 |
| 2     | 7.021     | 31011   | 1942   | 2.876  |
| 3     | 7.502     | 31044   | 1952   | 2.879  |
| 4     | 8.011     | 33994   | 1867   | 3.153  |
| 5     | 8.804     | 314     | 7      | 0.029  |
| 6     | 9.537     | 5789    | 422    | 0.537  |
| 7     | 10.018    | 934     | 71     | 0.087  |
| 8     | 10.432    | 371     | 43     | 0.034  |
| 9     | 10.758    | 765     | 80     | 0.071  |
| 10    | 10.992    | 2489    | 184    | 0.231  |
| 11    | 11.856    | 6817    | 352    | 0.632  |
| 12    | 12.665    | 625444  | 35706  | 58.005 |
| 13    | 13.300    | 2517    | 208    | 0.233  |
| 14    | 13.990    | 2471    | 162    | 0.229  |
| 15    | 15.291    | 15793   | 812    | 1.465  |
| 16    | 18.970    | 21175   | 517    | 1.964  |
| 17    | 20.185    | 2171    | 86     | 0.201  |
| 18    | 21.942    | 47861   | 1674   | 4.439  |
| Total |           | 1078252 | 60604  |        |

24 h

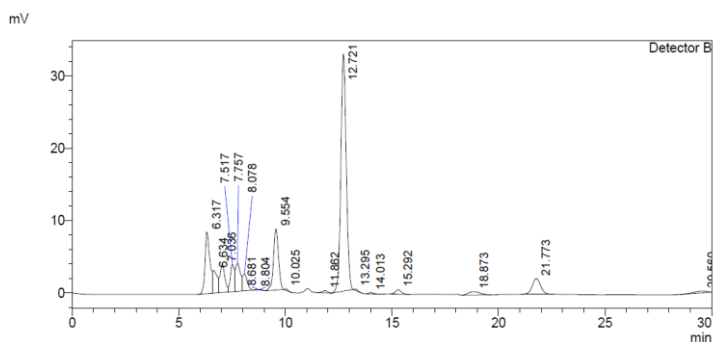

| Peak# | Ret. Time | Area    | Height | Conc.  |
|-------|-----------|---------|--------|--------|
| 1     | 6.317     | 135427  | 8510   | 11.095 |
| 2     | 6.634     | 47135   | 3132   | 3.862  |
| 3     | 7.036     | 62522   | 3875   | 5.122  |
| 4     | 7.517     | 49056   | 3787   | 4.019  |
| 5     | 7.757     | 63168   | 3856   | 5.175  |
| 6     | 8.078     | 35372   | 2329   | 2.898  |
| 7     | 8.681     | 745     | 79     | 0.061  |
| 8     | 8.804     | 365     | 26     | 0.030  |
| 9     | 9.554     | 135889  | 8430   | 11.133 |
| 10    | 10.025    | 2189    | 214    | 0.179  |
| 11    | 11.862    | 5576    | 296    | 0.457  |
| 12    | 12.721    | 577137  | 32757  | 47.283 |
| 13    | 13.295    | 2456    | 217    | 0.201  |
| 14    | 14.013    | 2460    | 161    | 0.202  |
| 15    | 15.292    | 11464   | 602    | 0.939  |
| 16    | 18.873    | 18452   | 472    | 1.512  |
| 17    | 21.773    | 59643   | 2188   | 4.886  |
| 18    | 29.560    | 11554   | 258    | 0.947  |
| Total |           | 1220612 | 71190  |        |

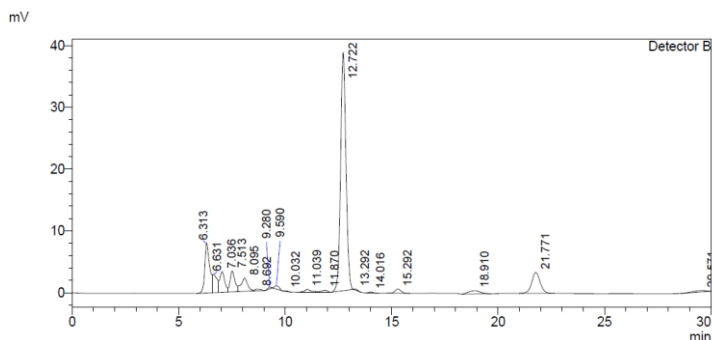

| Peak# | Ret. Time | Area    | Height | Conc.  |
|-------|-----------|---------|--------|--------|
| 1     | 6.313     | 128479  | 8042   | 10.829 |
| 2     | 6.631     | 45496   | 2960   | 3.835  |
| 3     | 7.036     | 54242   | 3355   | 4.572  |
| 4     | 7.513     | 54879   | 3366   | 4.626  |
| 5     | 8.095     | 45482   | 2137   | 3.834  |
| 6     | 8.692     | 5079    | 259    | 0.428  |
| 7     | 9.280     | 3215    | 297    | 0.271  |
| 8     | 9.590     | 8192    | 530    | 0.690  |
| 9     | 10.032    | 1112    | 104    | 0.094  |
| 10    | 11.039    | 10881   | 479    | 0.917  |
| 11    | 11.870    | 7153    | 351    | 0.603  |
| 12    | 12.722    | 681003  | 38524  | 57.402 |
| 13    | 13.292    | 1686    | 152    | 0.142  |
| 14    | 14.016    | 2468    | 162    | 0.208  |
| 15    | 15.292    | 12951   | 671    | 1.092  |
| 16    | 18.910    | 20394   | 548    | 1.719  |
| 17    | 21.771    | 92518   | 3382   | 7.798  |
| 18    | 29.571    | 11153   | 252    | 0.940  |
| Total |           | 1186383 | 65573  |        |

36 h

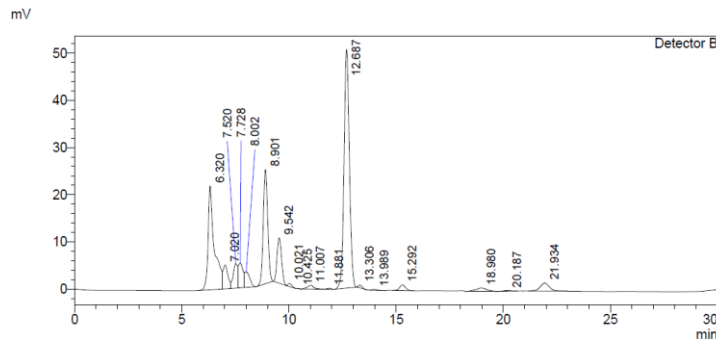

| Peak# | Ret. Time | Area    | Height | Conc.  |
|-------|-----------|---------|--------|--------|
| 1     | 6.320     | 444939  | 22015  | 19.755 |
| 2     | 7.020     | 82364   | 5027   | 3.657  |
| 3     | 7.520     | 73502   | 5181   | 3.263  |
| 4     | 7.728     | 81970   | 5251   | 3.639  |
| 5     | 8.002     | 52484   | 3249   | 2.330  |
| 6     | 8.901     | 355195  | 24229  | 15.770 |
| 7     | 9.542     | 137270  | 9597   | 6.095  |
| 8     | 10.021    | 7851    | 638    | 0.349  |
| 9     | 10.425    | 248     | 36     | 0.011  |
| 10    | 11.007    | 17635   | 819    | 0.783  |
| 11    | 11.881    | 3232    | 235    | 0.144  |
| 12    | 12.687    | 883096  | 50547  | 39.209 |
| 13    | 13.306    | 7037    | 566    | 0.312  |
| 14    | 13.989    | 3201    | 215    | 0.142  |
| 15    | 15.292    | 24448   | 1247   | 1.085  |
| 16    | 18.980    | 25070   | 726    | 1.113  |
| 17    | 20.187    | 3182    | 128    | 0.141  |
| 18    | 21.934    | 49580   | 1685   | 2.201  |
| Total |           | 2252303 | 131391 |        |

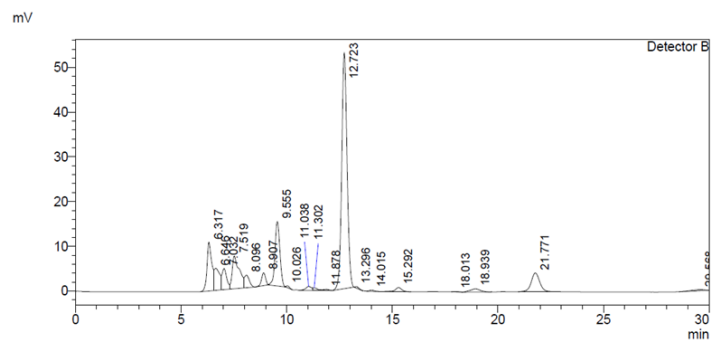

| Peak# | Ret. Time | Area    | Height | Conc.  |
|-------|-----------|---------|--------|--------|
| 1     | 6.317     | 174129  | 10905  | 8.903  |
| 2     | 6.646     | 85330   | 4925   | 4.363  |
| 3     | 7.032     | 74276   | 4720   | 3.798  |
| 4     | 7.519     | 171243  | 7337   | 8.755  |
| 5     | 8.086     | 45640   | 2815   | 2.333  |
| 6     | 8.907     | 38014   | 2841   | 1.944  |
| 7     | 9.555     | 226258  | 14373  | 11.568 |
| 8     | 10.026    | 3861    | 381    | 0.197  |
| 9     | 11.038    | 16536   | 906    | 0.845  |
| 10    | 11.302    | 9283    | 596    | 0.475  |
| 11    | 11.878    | 5721    | 307    | 0.292  |
| 12    | 12.723    | 928809  | 52679  | 47.487 |
| 13    | 13.296    | 3854    | 322    | 0.197  |
| 14    | 14.015    | 3968    | 260    | 0.203  |
| 15    | 15.292    | 19296   | 914    | 0.987  |
| 16    | 18.013    | 1284    | 80     | 0.066  |
| 17    | 18.939    | 23315   | 720    | 1.192  |
| 18    | 21.771    | 114227  | 4170   | 5.840  |
| 19    | 29.568    | 10859   | 245    | 0.555  |
| Total |           | 1955902 | 109497 |        |

42 h

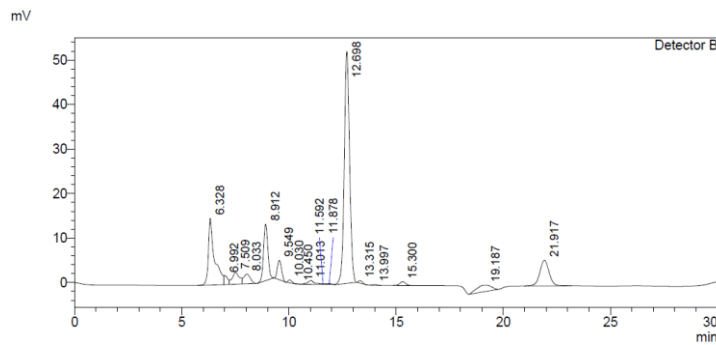

| Peak# | Ret. Time | Area    | Height | Conc.  |
|-------|-----------|---------|--------|--------|
| 1     | 6.328     | 301297  | 14980  | 16.092 |
| 2     | 6.992     | 23770   | 2000   | 1.270  |
| 3     | 7.509     | 61656   | 2653   | 3.293  |
| 4     | 8.033     | 46193   | 2157   | 2.467  |
| 5     | 8.912     | 181519  | 12704  | 9.695  |
| 6     | 9.549     | 58514   | 4358   | 3.125  |
| 7     | 10.030    | 8657    | 685    | 0.462  |
| 8     | 10.450    | 214     | 33     | 0.011  |
| 9     | 11.013    | 19380   | 854    | 1.035  |
| 10    | 11.592    | 1627    | 154    | 0.087  |
| 11    | 11.878    | 2749    | 192    | 0.147  |
| 12    | 12.688    | 900677  | 52096  | 48.105 |
| 13    | 13.315    | 7351    | 574    | 0.393  |
| 14    | 13.997    | 1997    | 143    | 0.107  |
| 15    | 15.300    | 17441   | 891    | 0.932  |
| 16    | 19.187    | 67076   | 1345   | 3.583  |
| 17    | 21.917    | 172191  | 5770   | 9.197  |
| Total |           | 1872309 | 101588 |        |

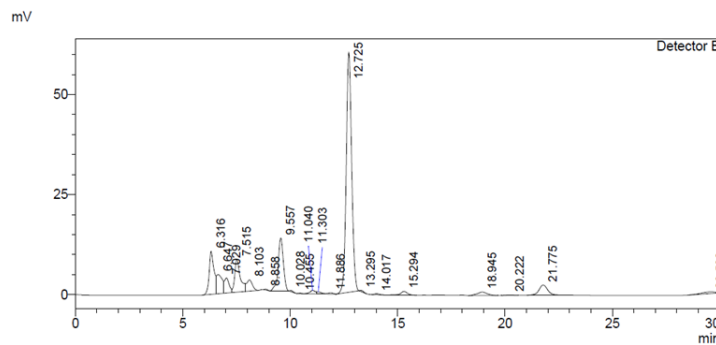

| Peak# | Ret. Time | Area    | Height | Conc.  |
|-------|-----------|---------|--------|--------|
| 1     | 6.316     | 167921  | 10769  | 8.523  |
| 2     | 6.647     | 89201   | 4815   | 4.528  |
| 3     | 7.029     | 57465   | 3773   | 2.917  |
| 4     | 7.515     | 148760  | 8255   | 7.551  |
| 5     | 8.103     | 51572   | 2806   | 2.618  |
| 6     | 8.558     | 1675    | 175    | 0.085  |
| 7     | 9.557     | 218723  | 13237  | 11.102 |
| 8     | 10.028    | 2900    | 293    | 0.147  |
| 9     | 10.455    | 1120    | 120    | 0.057  |
| 10    | 11.040    | 15253   | 867    | 0.774  |
| 11    | 11.303    | 7864    | 626    | 0.399  |
| 12    | 11.886    | 5281    | 300    | 0.268  |
| 13    | 12.725    | 1060390 | 59963  | 53.823 |
| 14    | 13.295    | 3054    | 276    | 0.155  |
| 15    | 14.017    | 3902    | 256    | 0.198  |
| 16    | 15.294    | 19237   | 924    | 0.976  |
| 17    | 18.945    | 27047   | 864    | 1.373  |
| 18    | 20.222    | 1789    | 73     | 0.091  |
| 19    | 21.775    | 68722   | 2514   | 3.488  |
| 20    | 29.582    | 18277   | 408    | 0.928  |
| Total |           | 1970155 | 111213 |        |

60 h

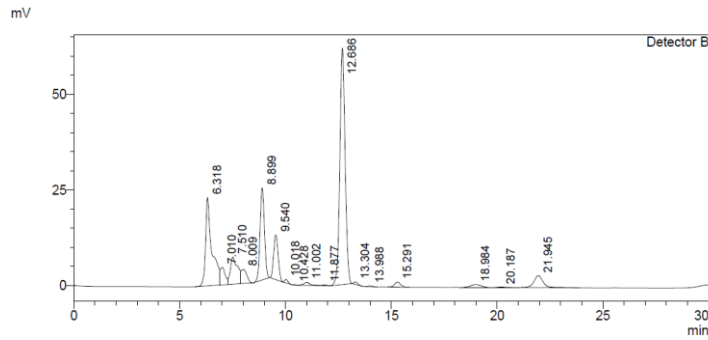

| Peak# | Ret. Time | Area    | Height | Conc.  |
|-------|-----------|---------|--------|--------|
| 1     | 6.318     | 480183  | 23050  | 18.593 |
| 2     | 7.010     | 70499   | 4638   | 2.730  |
| 3     | 7.510     | 171953  | 7059   | 6.658  |
| 4     | 8.009     | 66286   | 3686   | 2.567  |
| 5     | 8.899     | 350046  | 24031  | 13.554 |
| 6     | 9.540     | 166325  | 11601  | 6.440  |
| 7     | 10.018    | 10538   | 880    | 0.408  |
| 8     | 10.428    | 727     | 91     | 0.028  |
| 9     | 11.002    | 18261   | 838    | 0.707  |
| 10    | 11.877    | 3453    | 253    | 0.134  |
| 11    | 12.686    | 1080006 | 61765  | 41.819 |
| 12    | 13.304    | 8800    | 682    | 0.341  |
| 13    | 13.988    | 3313    | 225    | 0.128  |
| 14    | 15.291    | 26185   | 1331   | 1.014  |
| 15    | 18.984    | 30006   | 862    | 1.162  |
| 16    | 20.187    | 3583    | 144    | 0.139  |
| 17    | 21.945    | 92385   | 3105   | 3.577  |
| Total |           | 2582550 | 144242 |        |

| Peak# | Ret. Time | Area    | Height | Conc.  |
|-------|-----------|---------|--------|--------|
| 1     | 6.319     | 162059  | 10721  | 8.658  |
| 2     | 6.651     | 77463   | 4284   | 4.138  |
| 3     | 7.028     | 32441   | 2528   | 1.733  |
| 4     | 7.518     | 84705   | 6500   | 4.525  |
| 5     | 8.705     | 5450    | 304    | 0.291  |
| 6     | 9.346     | 13868   | 1355   | 0.741  |
| 7     | 9.563     | 93159   | 5630   | 4.977  |
| 8     | 10.034    | 1394    | 141    | 0.074  |
| 9     | 10.459    | 738     | 83     | 0.039  |
| 10    | 11.046    | 28138   | 1149   | 1.503  |
| 11    | 11.903    | 4578    | 293    | 0.245  |
| 12    | 12.730    | 1191783 | 67439  | 63.669 |
| 13    | 13.300    | 4346    | 371    | 0.232  |
| 14    | 14.020    | 3730    | 250    | 0.199  |
| 15    | 15.298    | 18618   | 959    | 0.995  |
| 16    | 18.951    | 29206   | 953    | 1.560  |
| 17    | 20.229    | 2935    | 111    | 0.157  |
| 18    | 21.777    | 96600   | 3523   | 5.161  |
| 19    | 29.537    | 20627   | 448    | 1.102  |
| Total |           | 1871840 | 107040 |        |

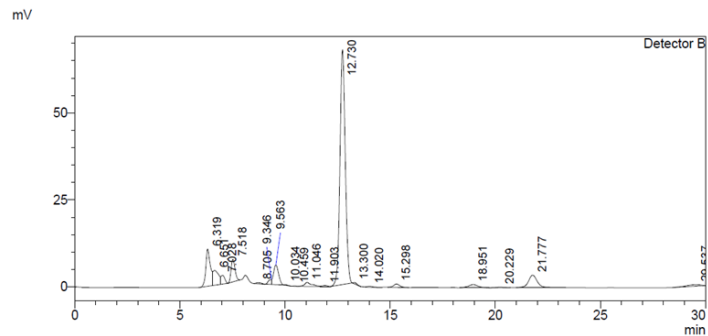

66 h

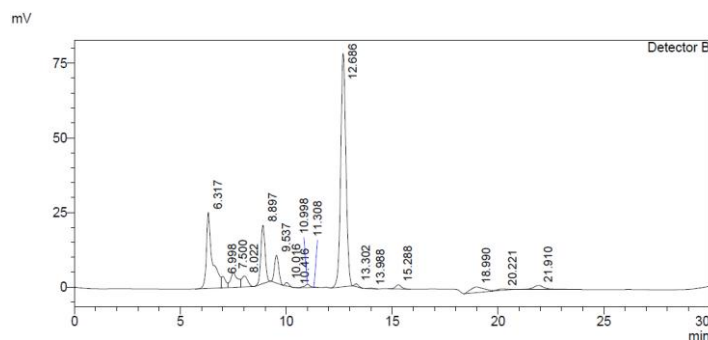

| Peak# | Ret. Time | Area    | Height | Conc.  |
|-------|-----------|---------|--------|--------|
| 1     | 6.317     | 494833  | 25474  | 18.210 |
| 2     | 6.998     | 54682   | 3797   | 2.012  |
| 3     | 7.500     | 116452  | 5006   | 4.285  |
| 4     | 8.022     | 74830   | 3693   | 2.754  |
| 5     | 8.897     | 275197  | 19550  | 10.127 |
| 6     | 9.537     | 127451  | 9276   | 4.690  |
| 7     | 10.016    | 14809   | 1195   | 0.545  |
| 8     | 10.416    | 331     | 45     | 0.012  |
| 9     | 10.998    | 19234   | 1099   | 0.708  |
| 10    | 11.308    | 1352    | 154    | 0.050  |
| 11    | 12.686    | 1351787 | 78108  | 49.745 |
| 12    | 13.302    | 11502   | 898    | 0.423  |
| 13    | 13.988    | 3306    | 231    | 0.122  |
| 14    | 15.288    | 27943   | 1432   | 1.028  |
| 15    | 18.990    | 82449   | 1910   | 3.034  |
| 16    | 20.221    | 15562   | 433    | 0.573  |
| 17    | 21.910    | 45705   | 1312   | 1.682  |
| Total |           | 2717425 | 153613 |        |

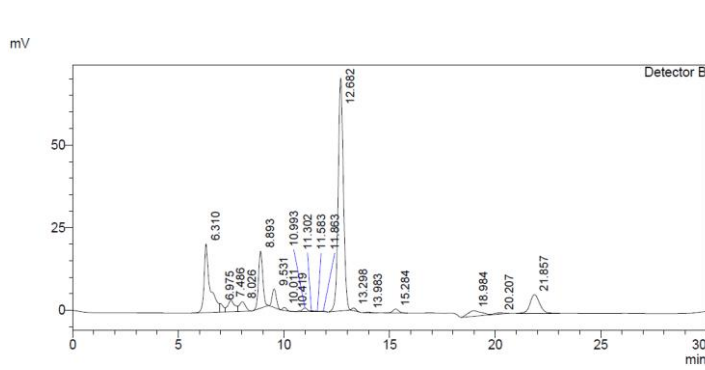

| Peak# | Ret. Time | Area    | Height | Conc.  |
|-------|-----------|---------|--------|--------|
| 1     | 6.310     | 403961  | 20740  | 16.570 |
| 2     | 6.975     | 31038   | 2586   | 1.273  |
| 3     | 7.486     | 80633   | 3470   | 3.307  |
| 4     | 8.026     | 59947   | 2851   | 2.459  |
| 5     | 8.893     | 243525  | 17204  | 9.989  |
| 6     | 9.531     | 74529   | 5600   | 3.057  |
| 7     | 10.011    | 11452   | 911    | 0.470  |
| 8     | 10.419    | 338     | 48     | 0.014  |
| 9     | 10.993    | 19270   | 1094   | 0.790  |
| 10    | 11.302    | 2225    | 198    | 0.091  |
| 11    | 11.583    | 566     | 63     | 0.023  |
| 12    | 11.863    | 1833    | 160    | 0.075  |
| 13    | 12.682    | 1213883 | 70288  | 49.793 |
| 14    | 13.298    | 10278   | 802    | 0.422  |
| 15    | 13.983    | 2722    | 191    | 0.112  |
| 16    | 15.284    | 23284   | 1192   | 0.955  |
| 17    | 18.984    | 72529   | 1684   | 2.975  |
| 18    | 20.207    | 12144   | 358    | 0.498  |
| 19    | 21.657    | 173724  | 5622   | 7.126  |
| Total |           | 2437880 | 135062 |        |

72 h

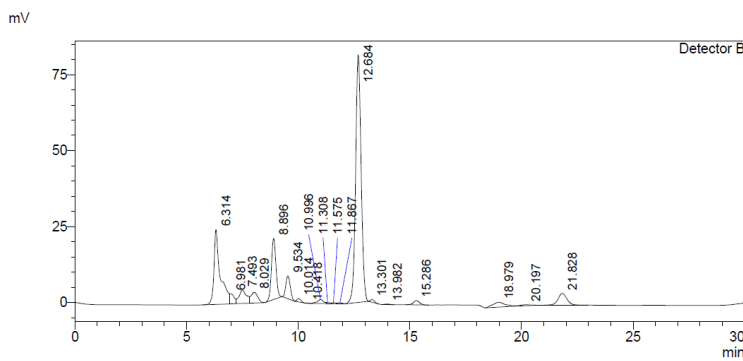

| Peak# | Ret. Time | Area    | Height | Conc.  |
|-------|-----------|---------|--------|--------|
| 1     | 6.314     | 485637  | 24615  | 17.488 |
| 2     | 6.981     | 43313   | 3315   | 1.560  |
| 3     | 7.493     | 103695  | 4413   | 3.734  |
| 4     | 8.029     | 72573   | 3493   | 2.613  |
| 5     | 8.896     | 286416  | 20109  | 10.314 |
| 6     | 9.534     | 101030  | 7462   | 3.638  |
| 7     | 10.014    | 14001   | 1115   | 0.504  |
| 8     | 10.418    | 301     | 43     | 0.011  |
| 9     | 10.996    | 24777   | 1329   | 0.992  |
| 10    | 11.308    | 4703    | 353    | 0.169  |
| 11    | 11.575    | 2425    | 229    | 0.087  |
| 12    | 11.867    | 4244    | 298    | 0.153  |
| 13    | 12.684    | 1413187 | 81388  | 50.888 |
| 14    | 13.301    | 11728   | 918    | 0.422  |
| 15    | 13.982    | 3172    | 223    | 0.114  |
| 16    | 15.286    | 27454   | 1401   | 0.989  |
| 17    | 18.979    | 61221   | 1584   | 2.205  |
| 18    | 20.197    | 10751   | 335    | 0.387  |
| 19    | 21.828    | 106408  | 3866   | 3.832  |
| Total |           | 2777035 | 156492 |        |

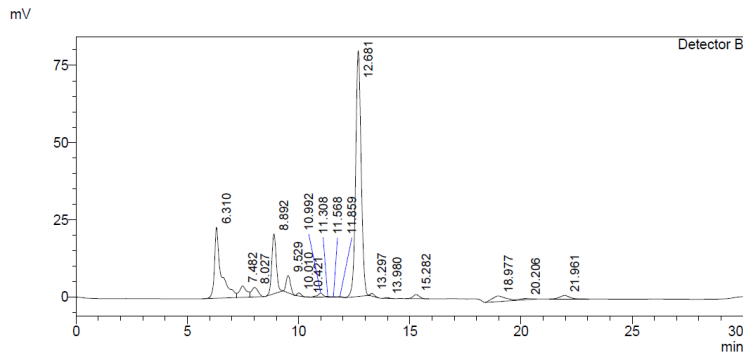

| Peak# | Ret. Time | Area    | Height | Conc.  |
|-------|-----------|---------|--------|--------|
| 1     | 6.310     | 477309  | 22972  | 18.708 |
| 2     | 7.482     | 85567   | 3671   | 3.354  |
| 3     | 8.027     | 64289   | 3086   | 2.520  |
| 4     | 8.892     | 276695  | 19387  | 10.845 |
| 5     | 9.529     | 73743   | 5587   | 2.890  |
| 6     | 10.010    | 12322   | 978    | 0.483  |
| 7     | 10.421    | 428     | 60     | 0.017  |
| 8     | 10.992    | 22629   | 1269   | 0.887  |
| 9     | 11.308    | 1253    | 164    | 0.049  |
| 10    | 11.568    | 735     | 73     | 0.029  |
| 11    | 11.859    | 1656    | 154    | 0.065  |
| 12    | 12.681    | 1373085 | 79416  | 53.817 |
| 13    | 13.297    | 10731   | 848    | 0.421  |
| 14    | 13.980    | 3020    | 213    | 0.118  |
| 15    | 15.282    | 26212   | 1339   | 1.027  |
| 16    | 18.977    | 74842   | 1810   | 2.933  |
| 17    | 20.206    | 13490   | 394    | 0.529  |
| 18    | 21.961    | 33389   | 1096   | 1.309  |
| Total |           | 2551393 | 142516 |        |

C: the curves of fermentation on 4% pretreated and washed corncob substrate fed to 8% with pretreated and unwashed corncob at 12 h, and fed to 16% with pretreated and unwashed corncob at 24 h.

0 h

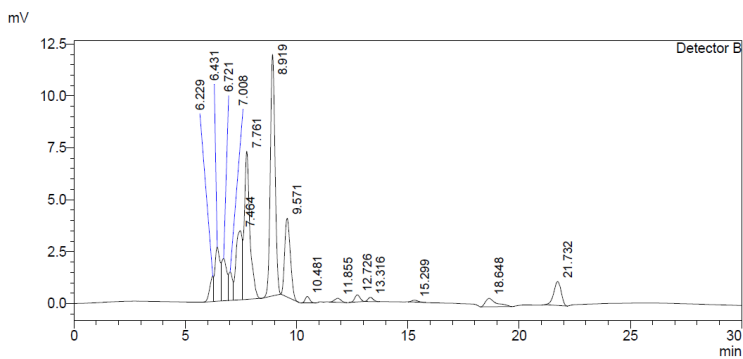

| Peak# | Ret. Time | Area   | Height | Conc.  |
|-------|-----------|--------|--------|--------|
| 1     | 6.229     | 14071  | 1211   | 2.373  |
| 2     | 6.431     | 41135  | 2611   | 6.938  |
| 3     | 6.721     | 33357  | 2041   | 5.626  |
| 4     | 7.008     | 17399  | 1376   | 2.934  |
| 5     | 7.464     | 64454  | 3329   | 10.870 |
| 6     | 7.761     | 124665 | 7126   | 21.025 |
| 7     | 8.919     | 173501 | 11618  | 29.262 |
| 8     | 9.571     | 65557  | 3793   | 11.056 |
| 9     | 10.481    | 4457   | 312    | 0.752  |
| 10    | 11.855    | 3807   | 187    | 0.642  |
| 11    | 12.726    | 5582   | 341    | 0.941  |
| 12    | 13.316    | 3279   | 203    | 0.553  |
| 13    | 15.299    | 1721   | 91     | 0.290  |
| 14    | 18.648    | 13548  | 397    | 2.285  |
| 15    | 21.732    | 26397  | 1152   | 4.452  |
| Total |           | 592928 | 35788  |        |

mV

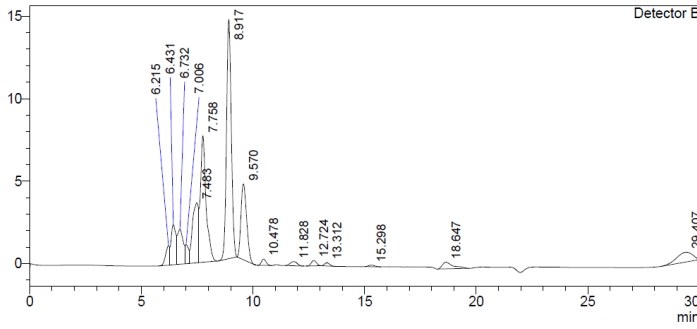

| Peak# | Ret. Time | Area   | Height | Conc.  |
|-------|-----------|--------|--------|--------|
| 1     | 6.215     | 14601  | 1184   | 2.193  |
| 2     | 6.431     | 36774  | 2429   | 5.523  |
| 3     | 6.732     | 36238  | 2108   | 5.442  |
| 4     | 7.006     | 12829  | 1150   | 1.927  |
| 5     | 7.483     | 68732  | 3644   | 10.322 |
| 6     | 7.758     | 135680 | 7659   | 20.377 |
| 7     | 8.917     | 216372 | 14472  | 32.496 |
| 8     | 9.570     | 79965  | 4598   | 12.009 |
| 9     | 10.478    | 5550   | 385    | 0.834  |
| 10    | 11.828    | 5424   | 253    | 0.815  |
| 11    | 12.724    | 5390   | 330    | 0.810  |
| 12    | 13.312    | 3096   | 195    | 0.465  |
| 13    | 15.298    | 1763   | 97     | 0.265  |
| 14    | 18.647    | 13672  | 402    | 2.053  |
| 15    | 29.407    | 29761  | 586    | 4.470  |
| Total |           | 665848 | 39493  |        |

12 h

mV

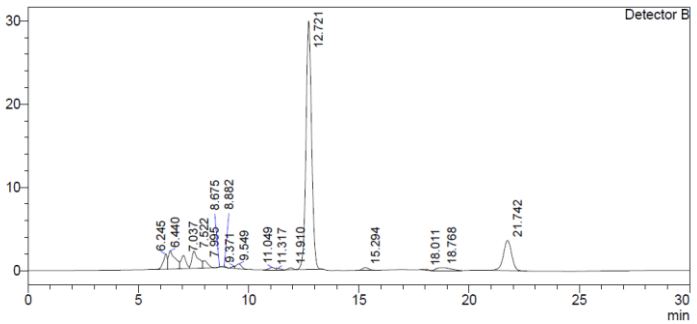

| Peak# | Ret. Time | Area   | Height | Conc.  |
|-------|-----------|--------|--------|--------|
| 1     | 6.245     | 22561  | 1816   | 2.738  |
| 2     | 6.440     | 46938  | 2168   | 5.696  |
| 3     | 7.037     | 25068  | 1585   | 3.042  |
| 4     | 7.522     | 42796  | 2038   | 5.193  |
| 5     | 7.995     | 14176  | 881    | 1.720  |
| 6     | 8.675     | 295    | 37     | 0.036  |
| 7     | 8.882     | 1065   | 105    | 0.129  |
| 8     | 9.371     | 2168   | 229    | 0.263  |
| 9     | 9.549     | 9416   | 578    | 1.143  |
| 10    | 11.049    | 5464   | 303    | 0.663  |
| 11    | 11.317    | 2049   | 174    | 0.249  |
| 12    | 11.910    | 3481   | 245    | 0.422  |
| 13    | 12.721    | 53245  | 29846  | 64.589 |
| 14    | 15.294    | 6302   | 326    | 0.765  |
| 15    | 18.011    | 1657   | 102    | 0.201  |
| 16    | 18.768    | 15773  | 354    | 1.914  |
| 17    | 21.742    | 92592  | 3631   | 11.236 |
| Total |           | 824046 | 44418  |        |

mV

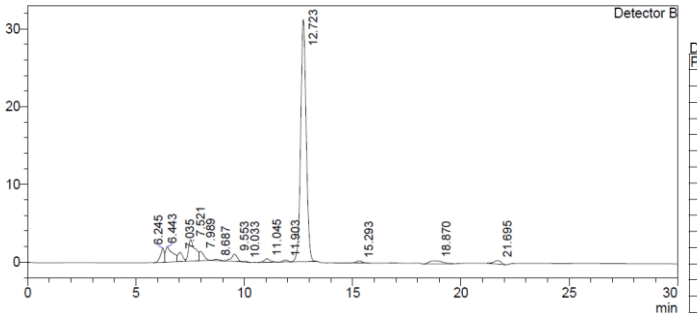

| Peak# | Ret. Time | Area   | Height | Conc.  |
|-------|-----------|--------|--------|--------|
| 1     | 6.245     | 22187  | 1807   | 2.835  |
| 2     | 6.443     | 43830  | 1958   | 5.600  |
| 3     | 7.035     | 18686  | 1183   | 2.387  |
| 4     | 7.521     | 59296  | 2773   | 7.576  |
| 5     | 7.989     | 17793  | 1180   | 2.273  |
| 6     | 8.687     | 2764   | 147    | 0.353  |
| 7     | 9.553     | 17137  | 926    | 2.189  |
| 8     | 10.033    | 1277   | 112    | 0.163  |
| 9     | 11.045    | 8189   | 434    | 1.046  |
| 10    | 11.903    | 4106   | 264    | 0.525  |
| 11    | 12.723    | 555128 | 31149  | 70.922 |
| 12    | 15.293    | 4988   | 264    | 0.637  |
| 13    | 18.870    | 17361  | 400    | 2.218  |
| 14    | 21.695    | 9983   | 460    | 1.275  |
| Total |           | 782726 | 43055  |        |

18 h

mV

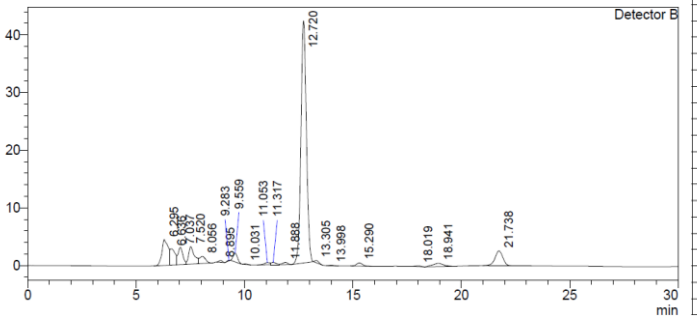

| Peak# | Ret. Time | Area    | Height | Conc.  |
|-------|-----------|---------|--------|--------|
| 1     | 6.295     | 93268   | 4486   | 8.086  |
| 2     | 6.636     | 43726   | 2809   | 3.791  |
| 3     | 7.037     | 46536   | 3012   | 4.035  |
| 4     | 7.520     | 56561   | 3009   | 4.904  |
| 5     | 8.056     | 23323   | 1207   | 2.022  |
| 6     | 8.895     | 3647    | 332    | 0.316  |
| 7     | 9.283     | 1041    | 102    | 0.090  |
| 8     | 9.559     | 20762   | 1506   | 1.800  |
| 9     | 10.031    | 1065    | 96     | 0.092  |
| 10    | 11.053    | 7072    | 417    | 0.613  |
| 11    | 11.317    | 7118    | 414    | 0.617  |
| 12    | 11.888    | 7014    | 396    | 0.608  |
| 13    | 12.720    | 739312  | 41960  | 64.097 |
| 14    | 13.305    | 5061    | 400    | 0.439  |
| 15    | 13.996    | 1334    | 90     | 0.116  |
| 16    | 15.290    | 10721   | 558    | 0.929  |
| 17    | 18.019    | 1842    | 109    | 0.160  |
| 18    | 18.941    | 20115   | 577    | 1.744  |
| 19    | 21.738    | 63904   | 2564   | 5.540  |
| Total |           | 1153423 | 64044  |        |

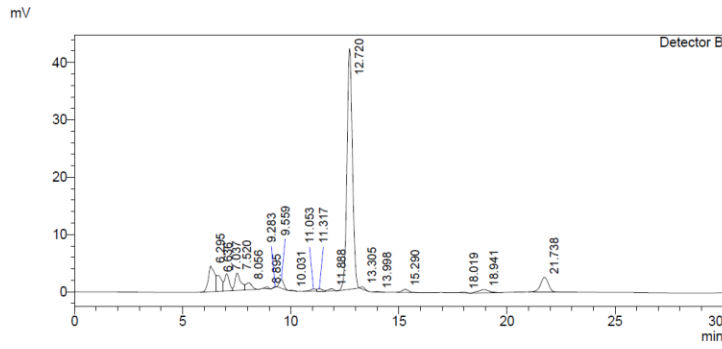

| Peak# | Ret. Time | Area    | Height | Conc.  |
|-------|-----------|---------|--------|--------|
| 1     | 6.297     | 91914   | 4627   | 7.726  |
| 2     | 6.643     | 47877   | 2863   | 4.024  |
| 3     | 7.039     | 45270   | 2896   | 3.805  |
| 4     | 7.521     | 78645   | 3901   | 6.610  |
| 5     | 8.035     | 25288   | 1422   | 2.126  |
| 6     | 8.746     | 412     | 29     | 0.035  |
| 7     | 8.884     | 2094    | 198    | 0.176  |
| 8     | 9.562     | 64646   | 3839   | 5.434  |
| 9     | 10.032    | 1279    | 121    | 0.107  |
| 10    | 10.473    | 162     | 20     | 0.014  |
| 11    | 11.053    | 16057   | 616    | 1.350  |
| 12    | 11.887    | 6857    | 371    | 0.576  |
| 13    | 12.725    | 760621  | 42944  | 63.934 |
| 14    | 13.297    | 1255    | 106    | 0.105  |
| 15    | 14.006    | 1267    | 84     | 0.107  |
| 16    | 15.296    | 9586    | 501    | 0.806  |
| 17    | 18.012    | 1576    | 98     | 0.132  |
| 18    | 18.943    | 24300   | 738    | 2.042  |
| 19    | 21.699    | 10599   | 472    | 0.891  |
| Total |           | 1189705 | 65847  |        |

24 h

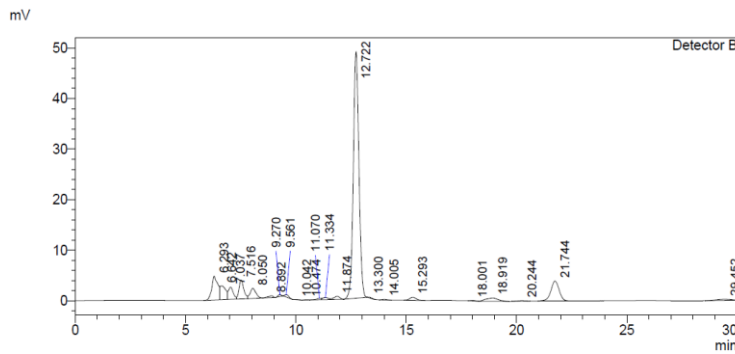

| Peak# | Ret. Time | Area    | Height | Conc.  |
|-------|-----------|---------|--------|--------|
| 1     | 6.293     | 90260   | 4716   | 6.799  |
| 2     | 6.642     | 47905   | 2737   | 3.609  |
| 3     | 7.037     | 37353   | 2428   | 2.814  |
| 4     | 7.516     | 56625   | 3732   | 4.265  |
| 5     | 8.050     | 36169   | 1979   | 2.725  |
| 6     | 8.892     | 6133    | 369    | 0.462  |
| 7     | 9.270     | 3943    | 384    | 0.297  |
| 8     | 9.561     | 5993    | 486    | 0.451  |
| 9     | 10.042    | 248     | 30     | 0.019  |
| 10    | 10.474    | 604     | 59     | 0.046  |
| 11    | 11.070    | 4157    | 305    | 0.313  |
| 12    | 11.334    | 8166    | 457    | 0.615  |
| 13    | 11.874    | 11857   | 599    | 0.893  |
| 14    | 12.722    | 863231  | 48748  | 65.026 |
| 15    | 13.300    | 1669    | 141    | 0.126  |
| 16    | 14.005    | 1613    | 110    | 0.122  |
| 17    | 15.293    | 12002   | 615    | 0.904  |
| 18    | 18.001    | 1239    | 80     | 0.093  |
| 19    | 18.919    | 25130   | 669    | 1.893  |
| 20    | 20.244    | 1957    | 78     | 0.147  |
| 21    | 21.744    | 100742  | 3933   | 7.589  |
| 22    | 29.452    | 10515   | 221    | 0.792  |
| Total |           | 1327510 | 72875  |        |

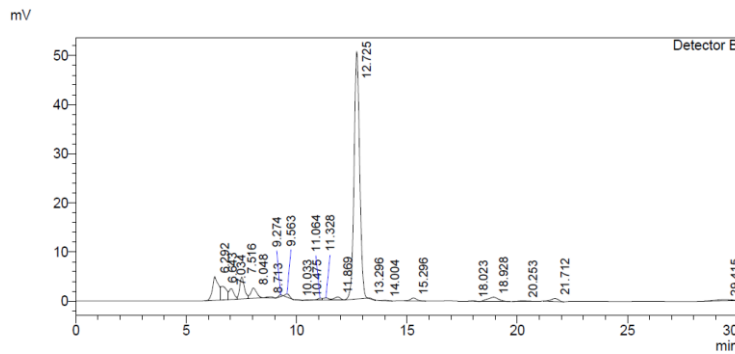

| Peak# | Ret. Time | Area    | Height | Conc.  |
|-------|-----------|---------|--------|--------|
| 1     | 6.292     | 90694   | 4804   | 7.030  |
| 2     | 6.643     | 50273   | 2792   | 3.897  |
| 3     | 7.034     | 34069   | 2230   | 2.641  |
| 4     | 7.516     | 66742   | 4412   | 5.173  |
| 5     | 8.048     | 38078   | 2081   | 2.952  |
| 6     | 8.713     | 4655    | 215    | 0.361  |
| 7     | 9.274     | 3828    | 360    | 0.297  |
| 8     | 9.563     | 8785    | 670    | 0.681  |
| 9     | 10.033    | 407     | 44     | 0.032  |
| 10    | 10.475    | 678     | 65     | 0.053  |
| 11    | 11.064    | 6146    | 413    | 0.476  |
| 12    | 11.328    | 7953    | 456    | 0.616  |
| 13    | 11.869    | 11883   | 587    | 0.921  |
| 14    | 12.725    | 891718  | 50304  | 69.121 |
| 15    | 13.296    | 1637    | 123    | 0.127  |
| 16    | 14.004    | 1288    | 90     | 0.100  |
| 17    | 15.296    | 11636   | 602    | 0.902  |
| 18    | 18.023    | 1453    | 94     | 0.113  |
| 19    | 18.928    | 30301   | 872    | 2.349  |
| 20    | 20.253    | 2477    | 94     | 0.192  |
| 21    | 21.712    | 13601   | 602    | 1.054  |
| 22    | 29.415    | 11788   | 239    | 0.914  |
| Total |           | 1290089 | 72149  |        |

36 h

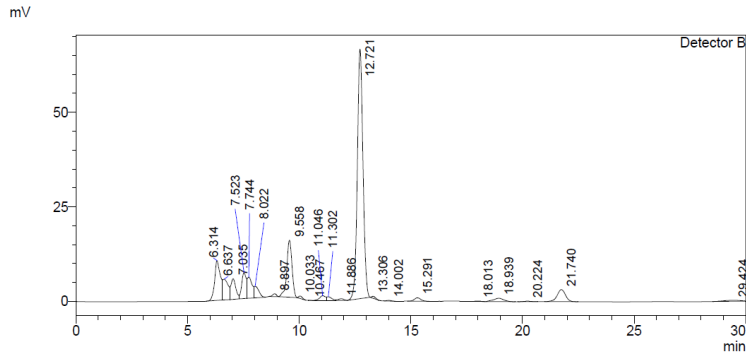

| Peak# | Ret. Time | Area    | Height | Conc.  |
|-------|-----------|---------|--------|--------|
| 1     | 6.314     | 190099  | 10562  | 8.592  |
| 2     | 6.637     | 91439   | 5504   | 4.133  |
| 3     | 7.035     | 85504   | 5435   | 3.865  |
| 4     | 7.523     | 98436   | 6870   | 4.449  |
| 5     | 7.744     | 83443   | 5602   | 3.772  |
| 6     | 8.022     | 44578   | 3049   | 2.015  |
| 7     | 8.897     | 8814    | 760    | 0.398  |
| 8     | 9.558     | 240246  | 15056  | 10.859 |
| 9     | 10.033    | 7061    | 639    | 0.319  |
| 10    | 10.467    | 112     | 20     | 0.005  |
| 11    | 11.046    | 23649   | 1277   | 1.069  |
| 12    | 11.302    | 15277   | 959    | 0.690  |
| 13    | 11.886    | 7979    | 462    | 0.361  |
| 14    | 12.721    | 1164573 | 65954  | 52.638 |
| 15    | 13.306    | 6105    | 506    | 0.276  |
| 16    | 14.002    | 2728    | 184    | 0.123  |
| 17    | 15.291    | 17684   | 914    | 0.808  |
| 18    | 18.013    | 1687    | 102    | 0.076  |
| 19    | 18.939    | 28982   | 906    | 1.310  |
| 20    | 20.224    | 2957    | 116    | 0.134  |
| 21    | 21.740    | 80277   | 3165   | 3.628  |
| 22    | 29.424    | 10585   | 220    | 0.478  |
| Total |           | 2212412 | 128265 |        |

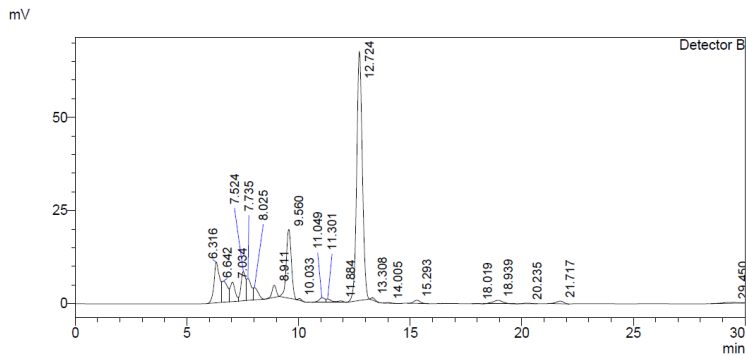

| Peak# | Ret. Time | Area    | Height | Conc.  |
|-------|-----------|---------|--------|--------|
| 1     | 6.316     | 193140  | 10926  | 8.535  |
| 2     | 6.642     | 97253   | 5678   | 4.298  |
| 3     | 7.034     | 81277   | 5244   | 3.592  |
| 4     | 7.524     | 114508  | 7845   | 5.060  |
| 5     | 7.735     | 83000   | 5855   | 3.668  |
| 6     | 8.025     | 49621   | 3248   | 2.193  |
| 7     | 8.911     | 42816   | 3279   | 1.892  |
| 8     | 9.560     | 283982  | 18454  | 12.550 |
| 9     | 10.033    | 4981    | 476    | 0.220  |
| 10    | 11.049    | 23601   | 1274   | 1.043  |
| 11    | 11.301    | 14091   | 897    | 0.623  |
| 12    | 11.884    | 7884    | 427    | 0.348  |
| 13    | 12.724    | 1176998 | 66837  | 52.014 |
| 14    | 13.308    | 7447    | 599    | 0.329  |
| 15    | 14.005    | 2510    | 172    | 0.111  |
| 16    | 15.293    | 16845   | 868    | 0.744  |
| 17    | 18.019    | 1626    | 100    | 0.072  |
| 18    | 18.939    | 30575   | 958    | 1.351  |
| 19    | 20.235    | 3728    | 141    | 0.165  |
| 20    | 21.717    | 16269   | 713    | 0.719  |
| 21    | 29.450    | 10694   | 224    | 0.473  |
| Total |           | 2262845 | 134214 |        |

42 h

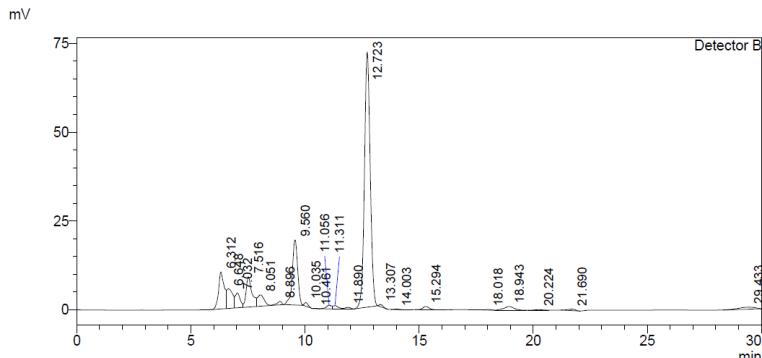

| Peak# | Ret. Time | Area    | Height | Conc.  |
|-------|-----------|---------|--------|--------|
| 1     | 6.312     | 181049  | 10411  | 7.894  |
| 2     | 6.648     | 101346  | 5540   | 4.419  |
| 3     | 7.032     | 63839   | 4200   | 2.784  |
| 4     | 7.516     | 151481  | 8472   | 6.605  |
| 5     | 8.051     | 65737   | 3202   | 2.866  |
| 6     | 8.896     | 14454   | 963    | 0.630  |
| 7     | 9.560     | 292508  | 18319  | 12.754 |
| 8     | 10.035    | 11340   | 1023   | 0.494  |
| 9     | 10.461    | 803     | 94     | 0.035  |
| 10    | 11.056    | 17041   | 1017   | 0.743  |
| 11    | 11.311    | 14749   | 871    | 0.643  |
| 12    | 11.890    | 7464    | 448    | 0.325  |
| 13    | 12.723    | 1266112 | 71693  | 55.207 |
| 14    | 13.307    | 7471    | 604    | 0.326  |
| 15    | 14.003    | 2624    | 180    | 0.114  |
| 16    | 15.294    | 18828   | 958    | 0.821  |
| 17    | 18.018    | 2128    | 125    | 0.093  |
| 18    | 18.943    | 33412   | 1089   | 1.457  |
| 19    | 20.224    | 3561    | 141    | 0.155  |
| 20    | 21.690    | 9378    | 428    | 0.409  |
| 21    | 29.433    | 28066   | 565    | 1.224  |
| Total |           | 2293390 | 130343 |        |

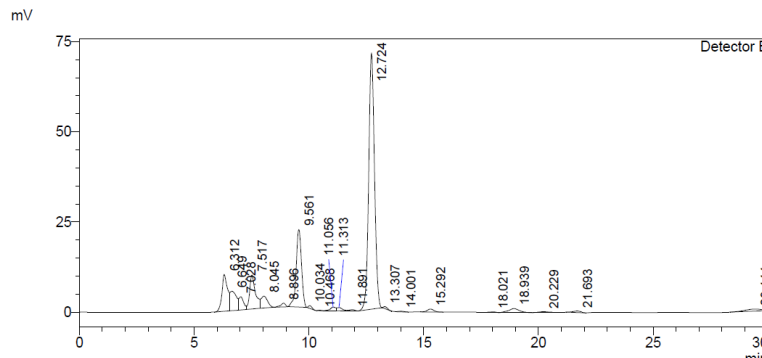

| Peak# | Ret. Time | Area    | Height | Conc.  |
|-------|-----------|---------|--------|--------|
| 1     | 6.312     | 175241  | 10189  | 7.553  |
| 2     | 6.649     | 101261  | 5388   | 4.364  |
| 3     | 7.028     | 54280   | 3658   | 2.339  |
| 4     | 7.517     | 166245  | 9396   | 7.165  |
| 5     | 8.045     | 65937   | 3273   | 2.842  |
| 6     | 8.896     | 15317   | 1032   | 0.660  |
| 7     | 9.561     | 340091  | 21486  | 14.658 |
| 8     | 10.034    | 7924    | 746    | 0.342  |
| 9     | 10.468    | 1218    | 135    | 0.052  |
| 10    | 11.056    | 17403   | 1038   | 0.750  |
| 11    | 11.313    | 15370   | 899    | 0.662  |
| 12    | 11.891    | 6162    | 376    | 0.266  |
| 13    | 12.724    | 1250346 | 70225  | 53.890 |
| 14    | 13.307    | 6665    | 552    | 0.287  |
| 15    | 14.001    | 2377    | 162    | 0.102  |
| 16    | 15.292    | 16409   | 841    | 0.707  |
| 17    | 18.021    | 1873    | 112    | 0.081  |
| 18    | 18.939    | 33479   | 1092   | 1.443  |
| 19    | 20.229    | 4393    | 166    | 0.189  |
| 20    | 21.693    | 9326    | 421    | 0.402  |
| 21    | 29.444    | 28851   | 583    | 1.243  |
| Total |           | 2320166 | 132471 |        |

48 h

mV

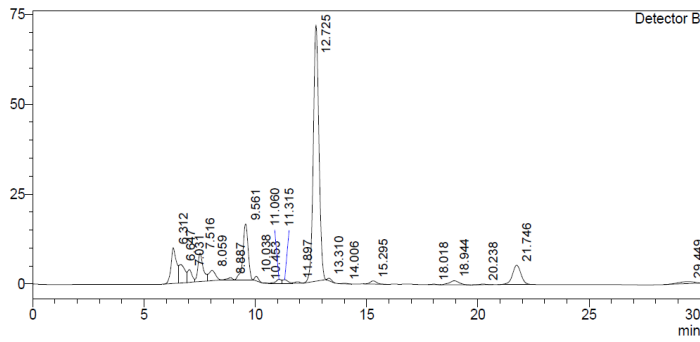

| Peak# | Ret. Time | Area    | Height | Conc.  |
|-------|-----------|---------|--------|--------|
| 1     | 6.312     | 170103  | 9905   | 7.340  |
| 2     | 6.647     | 94558   | 5121   | 4.080  |
| 3     | 7.031     | 51930   | 3522   | 2.241  |
| 4     | 7.516     | 129502  | 7923   | 5.588  |
| 5     | 8.059     | 60954   | 2855   | 2.630  |
| 6     | 8.887     | 9501    | 614    | 0.410  |
| 7     | 9.561     | 250891  | 15571  | 10.827 |
| 8     | 10.038    | 14801   | 1280   | 0.639  |
| 9     | 10.453    | 345     | 45     | 0.015  |
| 10    | 11.060    | 18818   | 1109   | 0.812  |
| 11    | 11.315    | 16617   | 984    | 0.717  |
| 12    | 11.897    | 6851    | 420    | 0.296  |
| 13    | 12.725    | 1255885 | 71180  | 54.194 |
| 14    | 13.310    | 8592    | 680    | 0.371  |
| 15    | 14.006    | 2525    | 174    | 0.109  |
| 16    | 15.295    | 17920   | 910    | 0.773  |
| 17    | 18.018    | 1963    | 119    | 0.085  |
| 18    | 18.944    | 33805   | 1128   | 1.459  |
| 19    | 20.238    | 3937    | 154    | 0.170  |
| 20    | 21.746    | 140445  | 5363   | 6.061  |
| 21    | 29.449    | 27431   | 553    | 1.184  |
| Total |           | 2317375 | 129609 |        |

mV

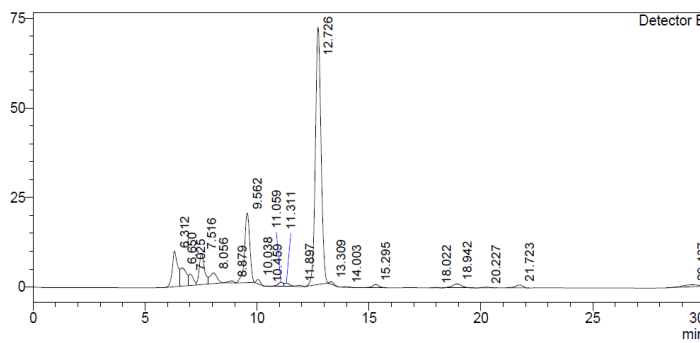

| Peak# | Ret. Time | Area    | Height | Conc.  |
|-------|-----------|---------|--------|--------|
| 1     | 6.312     | 168700  | 9920   | 7.423  |
| 2     | 6.650     | 97267   | 5132   | 4.280  |
| 3     | 7.025     | 45640   | 3162   | 2.008  |
| 4     | 7.516     | 141845  | 8814   | 6.242  |
| 5     | 8.056     | 64967   | 2990   | 2.859  |
| 6     | 8.879     | 9423    | 561    | 0.415  |
| 7     | 9.562     | 308567  | 19415  | 13.578 |
| 8     | 10.038    | 14955   | 1275   | 0.658  |
| 9     | 10.459    | 515     | 66     | 0.023  |
| 10    | 11.059    | 19901   | 1149   | 0.876  |
| 11    | 11.311    | 15474   | 931    | 0.681  |
| 12    | 11.897    | 5694    | 360    | 0.251  |
| 13    | 12.726    | 1264112 | 71769  | 55.625 |
| 14    | 13.309    | 8376    | 673    | 0.369  |
| 15    | 14.003    | 2270    | 157    | 0.100  |
| 16    | 15.295    | 16324   | 839    | 0.718  |
| 17    | 18.022    | 1929    | 114    | 0.085  |
| 18    | 18.942    | 34708   | 1153   | 1.527  |
| 19    | 20.227    | 4889    | 188    | 0.215  |
| 20    | 21.723    | 18639   | 802    | 0.820  |
| 21    | 29.437    | 28360   | 569    | 1.248  |
| Total |           | 2272558 | 130041 |        |

60 h

mV

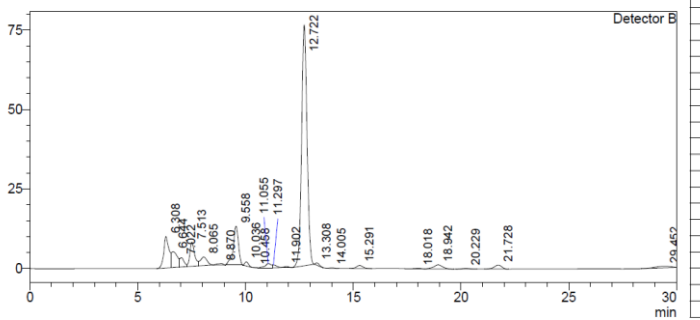

| Peak# | Ret. Time | Area    | Height | Conc.  |
|-------|-----------|---------|--------|--------|
| 1     | 6.308     | 166647  | 9890   | 7.534  |
| 2     | 6.644     | 94798   | 4988   | 4.286  |
| 3     | 7.022     | 41291   | 2902   | 1.867  |
| 4     | 7.513     | 117759  | 7542   | 5.324  |
| 5     | 8.065     | 57330   | 2686   | 2.592  |
| 6     | 8.870     | 9440    | 518    | 0.427  |
| 7     | 9.558     | 201077  | 12190  | 9.091  |
| 8     | 10.036    | 14967   | 1270   | 0.677  |
| 9     | 10.458    | 196     | 31     | 0.009  |
| 10    | 11.055    | 25319   | 1347   | 1.145  |
| 11    | 11.297    | 12500   | 876    | 0.565  |
| 12    | 11.902    | 6259    | 409    | 0.283  |
| 13    | 12.722    | 1333658 | 75698  | 60.297 |
| 14    | 13.308    | 9191    | 739    | 0.416  |
| 15    | 14.005    | 2450    | 171    | 0.111  |
| 16    | 15.291    | 18718   | 948    | 0.846  |
| 17    | 18.018    | 2227    | 132    | 0.101  |
| 18    | 18.942    | 38037   | 1300   | 1.720  |
| 19    | 20.229    | 4857    | 190    | 0.220  |
| 20    | 21.728    | 29330   | 1239   | 1.326  |
| 21    | 29.452    | 25752   | 525    | 1.164  |
| Total |           | 2211804 | 125592 |        |

mV

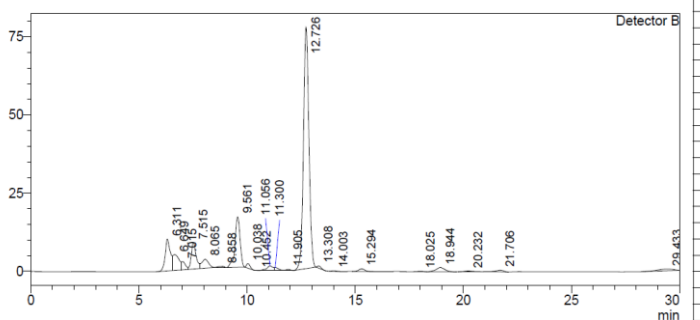

| Peak# | Ret. Time | Area    | Height | Conc.  |
|-------|-----------|---------|--------|--------|
| 1     | 6.311     | 168747  | 10186  | 7.314  |
| 2     | 6.649     | 101732  | 5083   | 4.410  |
| 3     | 7.015     | 33929   | 2636   | 1.471  |
| 4     | 7.515     | 132091  | 8474   | 5.726  |
| 5     | 8.065     | 61537   | 2839   | 2.667  |
| 6     | 8.858     | 8070    | 430    | 0.350  |
| 7     | 9.561     | 260895  | 16150  | 11.309 |
| 8     | 10.038    | 17480   | 1493   | 0.758  |
| 9     | 10.452    | 194     | 30     | 0.008  |
| 10    | 11.056    | 28845   | 1481   | 1.250  |
| 11    | 11.300    | 13071   | 937    | 0.567  |
| 12    | 11.905    | 5301    | 356    | 0.230  |
| 13    | 12.726    | 1359413 | 77181  | 58.924 |
| 14    | 13.308    | 8533    | 713    | 0.370  |
| 15    | 14.003    | 2229    | 158    | 0.097  |
| 16    | 15.294    | 17134   | 875    | 0.743  |
| 17    | 18.025    | 2296    | 132    | 0.100  |
| 18    | 18.944    | 40036   | 1368   | 1.735  |
| 19    | 20.232    | 5610    | 217    | 0.243  |
| 20    | 21.706    | 11905   | 524    | 0.516  |
| 21    | 29.433    | 28006   | 558    | 1.214  |
| Total |           | 2307055 | 131821 |        |



66 h

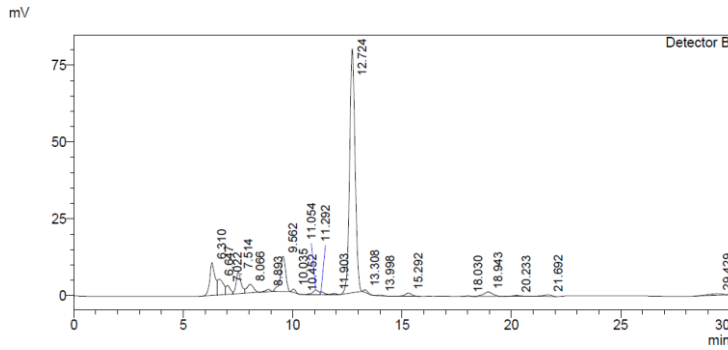

| Peak# | Ret. Time | Area    | Height | Conc.  |
|-------|-----------|---------|--------|--------|
| 1     | 6.310     | 175507  | 10665  | 7.765  |
| 2     | 6.647     | 98259   | 5108   | 4.347  |
| 3     | 7.022     | 39777   | 2857   | 1.760  |
| 4     | 7.514     | 110659  | 7011   | 4.896  |
| 5     | 8.066     | 58261   | 2755   | 2.578  |
| 6     | 8.893     | 11630   | 780    | 0.515  |
| 7     | 9.562     | 191241  | 11453  | 8.461  |
| 8     | 10.035    | 13047   | 1146   | 0.577  |
| 9     | 10.452    | 285     | 40     | 0.013  |
| 10    | 11.054    | 28847   | 1490   | 1.276  |
| 11    | 11.292    | 11731   | 866    | 0.519  |
| 12    | 11.903    | 6428    | 423    | 0.284  |
| 13    | 12.724    | 1395936 | 79275  | 61.760 |
| 14    | 13.308    | 10387   | 831    | 0.460  |
| 15    | 13.996    | 2446    | 170    | 0.108  |
| 16    | 15.292    | 19677   | 1000   | 0.871  |
| 17    | 18.030    | 2596    | 149    | 0.115  |
| 18    | 18.943    | 40600   | 1405   | 1.796  |
| 19    | 20.233    | 5101    | 199    | 0.226  |
| 20    | 21.692    | 10821   | 471    | 0.479  |
| 21    | 29.429    | 27031   | 545    | 1.196  |
| Total |           | 2260268 | 128659 |        |

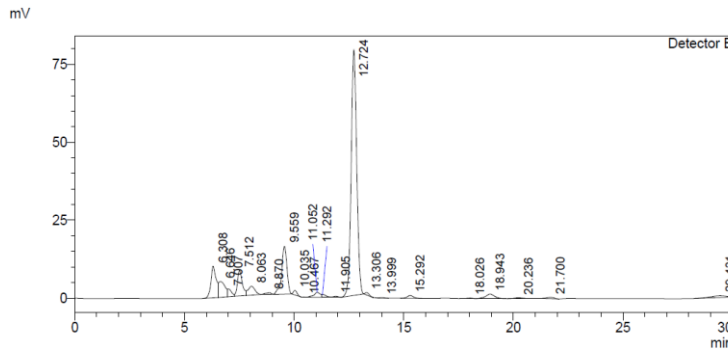

| Peak# | Ret. Time | Area    | Height | Conc.  |
|-------|-----------|---------|--------|--------|
| 1     | 6.308     | 169349  | 10163  | 7.297  |
| 2     | 6.646     | 102354  | 5087   | 4.410  |
| 3     | 7.007     | 30558   | 2491   | 1.317  |
| 4     | 7.512     | 127107  | 8142   | 5.477  |
| 5     | 8.063     | 60644   | 2831   | 2.613  |
| 6     | 8.870     | 8921    | 499    | 0.384  |
| 7     | 9.559     | 249927  | 15313  | 10.769 |
| 8     | 10.035    | 16565   | 1428   | 0.714  |
| 9     | 10.467    | 171     | 28     | 0.007  |
| 10    | 11.052    | 32299   | 1589   | 1.392  |
| 11    | 11.292    | 11828   | 935    | 0.510  |
| 12    | 11.905    | 5110    | 349    | 0.220  |
| 13    | 12.724    | 1386759 | 78681  | 59.751 |
| 14    | 13.306    | 9234    | 734    | 0.398  |
| 15    | 13.999    | 2240    | 157    | 0.097  |
| 16    | 15.292    | 17829   | 907    | 0.768  |
| 17    | 18.026    | 2531    | 145    | 0.109  |
| 18    | 18.943    | 42587   | 1468   | 1.835  |
| 19    | 20.236    | 6074    | 230    | 0.262  |
| 20    | 21.700    | 9978    | 446    | 0.430  |
| 21    | 29.431    | 28831   | 573    | 1.242  |
| Total |           | 2320895 | 132196 |        |

72 h

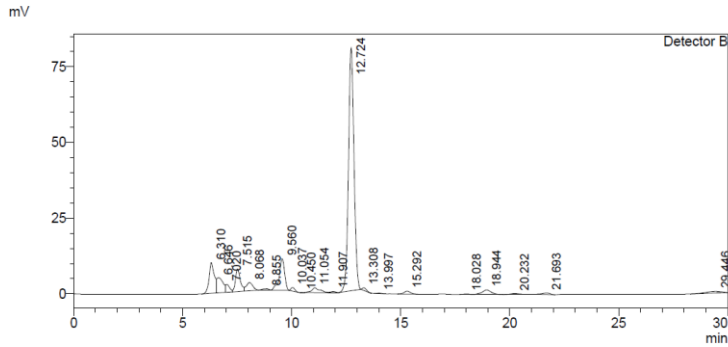

| Peak# | Ret. Time | Area    | Height | Conc.  |
|-------|-----------|---------|--------|--------|
| 1     | 6.310     | 169121  | 10151  | 7.494  |
| 2     | 6.646     | 97728   | 5016   | 4.331  |
| 3     | 7.020     | 35215   | 2621   | 1.560  |
| 4     | 7.515     | 115704  | 7505   | 5.127  |
| 5     | 8.068     | 56638   | 2689   | 2.510  |
| 6     | 8.855     | 9078    | 456    | 0.402  |
| 7     | 9.560     | 177191  | 10405  | 7.852  |
| 8     | 10.037    | 14486   | 1217   | 0.642  |
| 9     | 10.450    | 227     | 33     | 0.010  |
| 10    | 11.054    | 42006   | 1584   | 1.861  |
| 11    | 11.907    | 6117    | 413    | 0.271  |
| 12    | 12.724    | 1411919 | 80180  | 62.566 |
| 13    | 13.308    | 10791   | 848    | 0.478  |
| 14    | 13.997    | 2430    | 169    | 0.108  |
| 15    | 15.292    | 19020   | 969    | 0.843  |
| 16    | 18.028    | 2440    | 140    | 0.108  |
| 17    | 18.944    | 42510   | 1474   | 1.884  |
| 18    | 20.232    | 5903    | 225    | 0.262  |
| 19    | 21.693    | 10643   | 474    | 0.472  |
| 20    | 29.446    | 27506   | 555    | 1.219  |
| Total |           | 2256674 | 127125 |        |

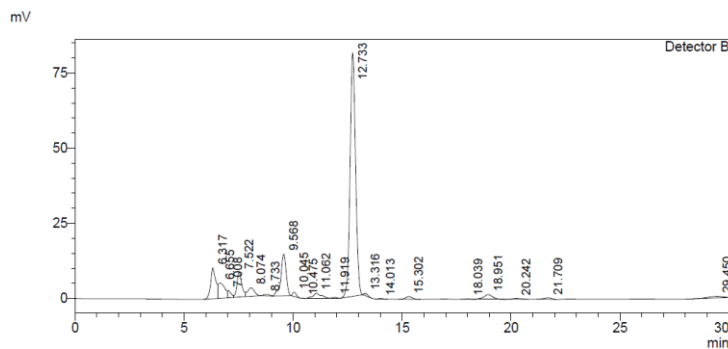

| Peak# | Ret. Time | Area    | Height | Conc.  |
|-------|-----------|---------|--------|--------|
| 1     | 6.317     | 169276  | 10221  | 7.242  |
| 2     | 6.655     | 102733  | 5055   | 4.395  |
| 3     | 7.008     | 27514   | 2360   | 1.177  |
| 4     | 7.522     | 127299  | 8260   | 5.446  |
| 5     | 8.074     | 59331   | 2784   | 2.538  |
| 6     | 8.733     | 8566    | 418    | 0.366  |
| 7     | 9.568     | 229237  | 13837  | 9.808  |
| 8     | 10.045    | 16693   | 1418   | 0.714  |
| 9     | 10.475    | 140     | 25     | 0.006  |
| 10    | 11.062    | 46528   | 1719   | 1.991  |
| 11    | 11.919    | 5022    | 353    | 0.215  |
| 12    | 12.733    | 1424748 | 80895  | 60.957 |
| 13    | 13.316    | 9132    | 772    | 0.391  |
| 14    | 14.013    | 2291    | 161    | 0.098  |
| 15    | 15.302    | 17624   | 893    | 0.754  |
| 16    | 18.039    | 2382    | 138    | 0.102  |
| 17    | 18.951    | 44462   | 1548   | 1.902  |
| 18    | 20.242    | 6352    | 243    | 0.272  |
| 19    | 21.709    | 10536   | 468    | 0.451  |
| 20    | 29.450    | 27440   | 555    | 1.174  |
| Total |           | 2337305 | 132121 |        |

84 h

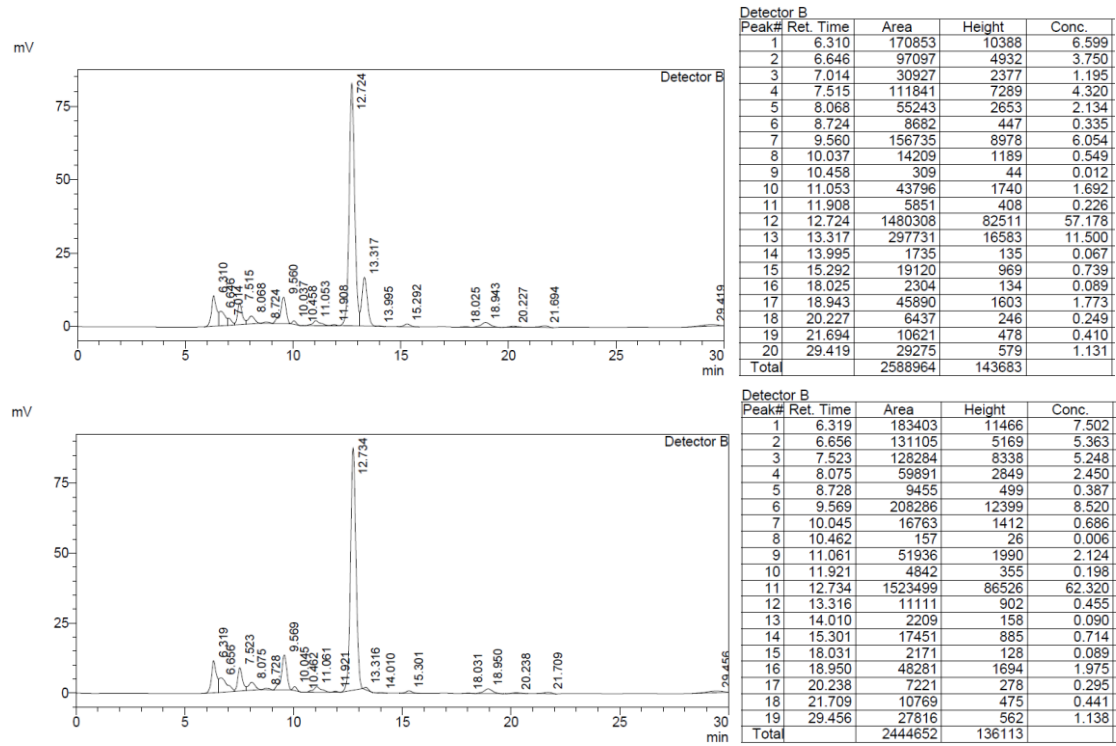

Figure S4 Standard curves

- Lactic acid (12.68 min) and acetic acid (15.29 min)  
0.02 g/L 0.05 g/L

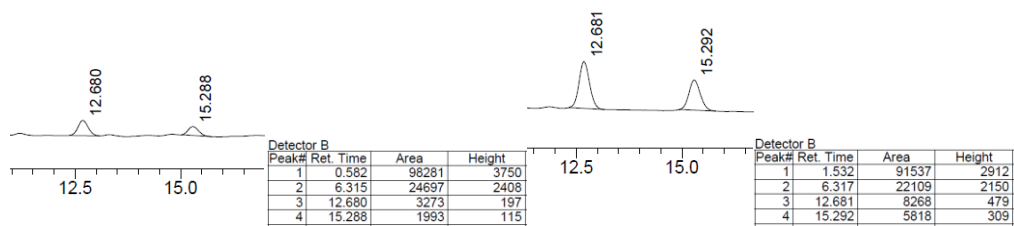

0.101 g/L

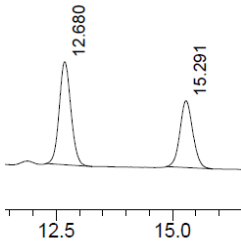

| Detector B |           |       |        |
|------------|-----------|-------|--------|
| Peak#      | Ret. Time | Area  | Height |
| 1          | 1.554     | 80690 | 2995   |
| 2          | 6.318     | 18548 | 1812   |
| 3          | 12.680    | 17260 | 987    |
| 4          | 15.291    | 12340 | 640    |

0.202 g/L

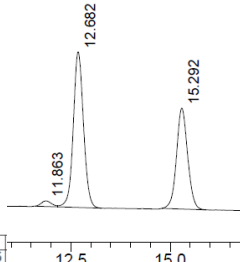

| Detector B |           |       |        |
|------------|-----------|-------|--------|
| Peak#      | Ret. Time | Area  | Height |
| 1          | 1.547     | 92990 | 3445   |
| 2          | 6.325     | 11672 | 1139   |
| 3          | 11.863    | 1222  | 69     |
| 4          | 12.682    | 35195 | 1976   |
| 5          | 15.292    | 25036 | 1281   |

0.505 g/L

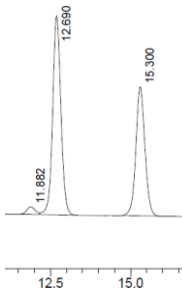

| Detector B |           |       |        |
|------------|-----------|-------|--------|
| Peak#      | Ret. Time | Area  | Height |
| 1          | 1.554     | 91338 | 3390   |
| 2          | 11.882    | 3607  | 190    |
| 3          | 12.690    | 89481 | 5011   |
| 4          | 15.300    | 63961 | 3247   |

1.01 g/L

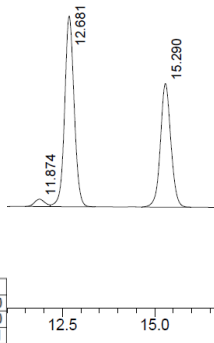

| Detector B |           |        |        |
|------------|-----------|--------|--------|
| Peak#      | Ret. Time | Area   | Height |
| 1          | 1.563     | 83540  | 3101   |
| 2          | 11.874    | 7588   | 389    |
| 3          | 12.681    | 179666 | 10055  |
| 4          | 15.290    | 128942 | 6521   |

2.02 g/L

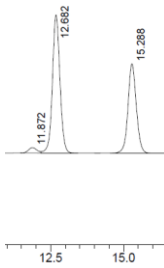

| Detector B |           |        |        |
|------------|-----------|--------|--------|
| Peak#      | Ret. Time | Area   | Height |
| 1          | 1.547     | 76876  | 2849   |
| 2          | 11.872    | 15256  | 776    |
| 3          | 12.682    | 358454 | 20038  |
| 4          | 15.288    | 257402 | 12975  |

## 2. Formic acid

0.02 g/L

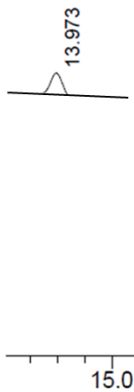

| Detector B |           |       |
|------------|-----------|-------|
| Peak#      | Ret. Time | Area  |
| 1          | 6.310     | 26160 |
| 2          | 13.973    | 12975 |

0.05 g/L

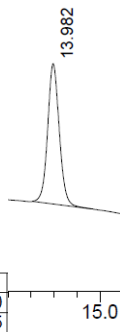

| Detector B |           |       |        |
|------------|-----------|-------|--------|
| Peak#      | Ret. Time | Area  | Height |
| 1          | 1.923     | 71490 | 496    |
| 2          | 6.313     | 21111 | 2114   |
| 3          | 13.982    | 29621 | 1686   |

0.1 g/L

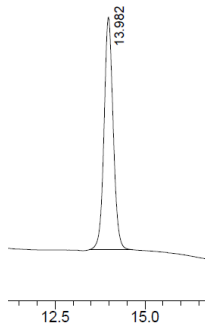

| Detector B |           |       |        |
|------------|-----------|-------|--------|
| Peak#      | Ret. Time | Area  | Height |
| 1          | 6.314     | 16675 | 1676   |
| 2          | 13.982    | 59769 | 3385   |

0.2 g/L

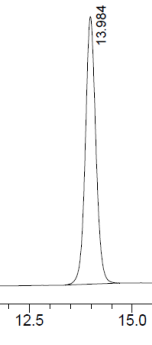

| Detector B |           |        |        |
|------------|-----------|--------|--------|
| Peak#      | Ret. Time | Area   | Height |
| 1          | 6.321     | 10178  | 948    |
| 2          | 13.984    | 117902 | 6660   |

0.5 g/L

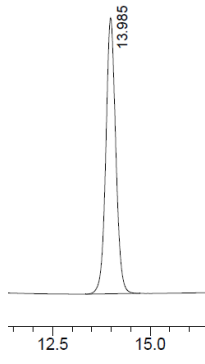

| Detector B |           |        |        |
|------------|-----------|--------|--------|
| Peak#      | Ret. Time | Area   | Height |
| 1          | 0.447     | 37610  | 1688   |
| 2          | 6.573     | 10880  | 510    |
| 3          | 13.985    | 291259 | 16483  |

1 g/L

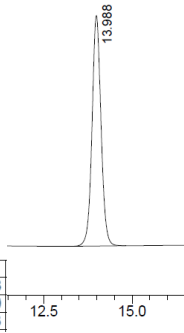

| Detector B |           |        |        |
|------------|-----------|--------|--------|
| Peak#      | Ret. Time | Area   | Height |
| 1          | 6.582     | 35684  | 1575   |
| 2          | 13.988    | 580263 | 32805  |

2 g/L

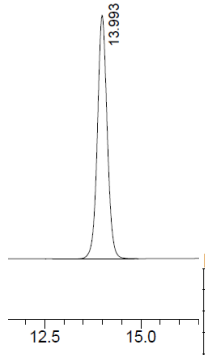

| Detector B |           |         |        |
|------------|-----------|---------|--------|
| Peak#      | Ret. Time | Area    | Height |
| 1          | 6.587     | 81662   | 3400   |
| 2          | 9.528     | 2912    | 203    |
| 3          | 13.993    | 1148894 | 64898  |

3. Glucose (8.9 min) and xylose (9.5 min)

0.02 g/L

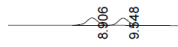

0.05 g/L

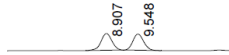

Detector B

| Peak# | Ret. Time | Area  | Height |
|-------|-----------|-------|--------|
| 1     | 8.906     | 5214  | 335    |
| 2     | 9.548     | 4846  | 323    |
| Total |           | 10060 | 658    |

Detector B

| Peak# | Ret. Time | Area  | Height |
|-------|-----------|-------|--------|
| 1     | 3.790     | 48056 | 1867   |
| 2     | 8.907     | 12746 | 838    |
| 3     | 9.548     | 12114 | 806    |
| Total |           | 72916 | 3511   |

0.1 g/L

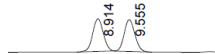

0.2 g/L

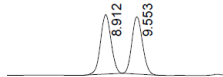

Detector B

| Peak# | Ret. Time | Area   | Height |
|-------|-----------|--------|--------|
| 1     | 3.805     | 51554  | 2008   |
| 2     | 8.914     | 25244  | 1682   |
| 3     | 9.555     | 24358  | 1621   |
| Total |           | 101155 | 5311   |

Detector B

| Peak# | Ret. Time | Area   | Height |
|-------|-----------|--------|--------|
| 1     | 3.811     | 50617  | 1968   |
| 2     | 8.912     | 50475  | 3365   |
| 3     | 9.553     | 48815  | 3245   |
| Total |           | 149907 | 8579   |

0.5 g/L

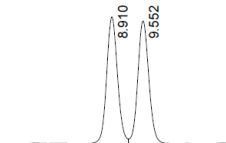

1 g/L

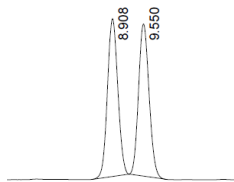

Detector B

| Peak# | Ret. Time | Area   | Height |
|-------|-----------|--------|--------|
| 1     | 3.810     | 50988  | 1989   |
| 2     | 8.910     | 151122 | 10184  |
| 3     | 9.552     | 147346 | 9816   |
| Total |           | 349456 | 21989  |

Detector B

| Peak# | Ret. Time | Area   | Height |
|-------|-----------|--------|--------|
| 1     | 3.815     | 51245  | 2001   |
| 2     | 8.908     | 254100 | 17178  |
| 3     | 9.550     | 248009 | 16553  |
| Total |           | 553354 | 35732  |

2 g/L

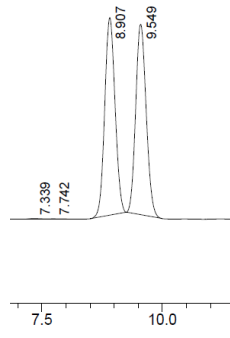

| Detector B |           |         |        |
|------------|-----------|---------|--------|
| Peak#      | Ret. Time | Area    | Height |
| 1          | 3.805     | 50907   | 1982   |
| 2          | 7.339     | 1965    | 121    |
| 3          | 7.742     | 1085    | 59     |
| 4          | 8.907     | 509951  | 34520  |
| 5          | 9.549     | 498222  | 33252  |
| Total      |           | 1062130 | 69934  |

5 g/L

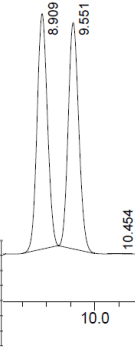

| Detector B |           |         |        |
|------------|-----------|---------|--------|
| Peak#      | Ret. Time | Area    | Height |
| 1          | 3.807     | 50513   | 1972   |
| 2          | 6.788     | 348334  | 9008   |
| 3          | 7.340     | 201472  | 5659   |
| 4          | 7.744     | 65693   | 2862   |
| 5          | 8.909     | 1282274 | 87084  |
| 6          | 9.551     | 1255553 | 83661  |
| 7          | 10.454    | 1019    | 76     |
| 8          | 11.196    | 1037    | 73     |
| Total      |           | 3205876 | 190394 |
